# Supplementary material for: Switching between mono and doubly reduced odd alternant hydrocarbon: designing a redox catalyst
Source: Royal Society of Chemistry journal article supplement (doi:10.1039/d0sc05972b), 2020-12-23
Supplement: d0sc05972b1.pdf [file d0sc05972b1.pdf]

## **Supporting Information**

### **Switching between mono- and doubly-reduced odd alternant hydrocarbon: Designing redox catalyst**

Jasimuddin Ahmed,<sup>a</sup> Paramita Datta,<sup>a</sup> Arpan Das,<sup>a</sup> Stephy Jomy<sup>a,b</sup> and Swadhin K. Mandal<sup>a\*</sup>

<sup>a</sup>Department of Chemical Sciences, Indian Institute of Science Education and Research-Kolkata, Mohanpur-741246, India.

<sup>b</sup>Department of Chemistry, Indian Institute of Technology Madras, Chennai-600036, India.

\*Correspondence to: [swadhin.mandal@iiserkol.ac.in](mailto:swadhin.mandal@iiserkol.ac.in)

|                                                                                                                           |     |
|---------------------------------------------------------------------------------------------------------------------------|-----|
| 1. Experimental section.....                                                                                              | S4  |
| 2. Preparation and characterization of phenalenyl ligand and<br>the K-phenalenyl complexes.....                           | S5  |
| I. Synthesis and characterization PLY(O,O)-K ( <b>1a</b> and <b>1a(CE)</b> ).....                                         | S5  |
| II. Synthesis and characterization PLY(N,O)-K ( <b>1b</b> and <b>1b(CE)</b> ).....                                        | S6  |
| III. Isolation, characterization and crystallization of<br>PLY(O,O)-K monoreduced complex ( <b>2</b> ).....               | S6  |
| IV. Synthesis and characterization of doubly-reduced PLY(O,O)-K complex ( <b>3</b> ).....                                 | S7  |
| V. Trapping and characterization of doubly-reduced PLY(O,O)-K.....                                                        | S8  |
| VI. Trapping and characterization of deuterium leveled doubly-reduced PLY(O,O)-K.....                                     | S9  |
| 3. Cyclic voltametric experiment of potassium phenalenyl complex.....                                                     | S11 |
| 4. <sup>1</sup> H, <sup>13</sup> C NMR spectra and mass spectra of various phenalenyl species<br>and K-complexes.....     | S12 |
| 5. Computational Details.....                                                                                             | S24 |
| 6. Theoretically predicted <sup>1</sup> H NMR spectra.....                                                                | S25 |
| 7. Electrostatic potential maps of PLY(N,O)-K.....                                                                        | S26 |
| 8. Anisotropic Induced Current Density (AICD) plots.....                                                                  | S27 |
| 9. Model example for Nuclear Independent Chemical Shift (NICS) calculation.....                                           | S29 |
| 10. Theoretical calculations for all reduction processes.....                                                             | S34 |
| 11. Optimized geometries of three different redox states of PLY(O,O)-K complex.....                                       | S35 |
| 12. DFT calculation for the quenching experiment by HCl treatment<br>of doubly-reduced PLY-K complex.....                 | S36 |
| 13. Frontier molecular orbital diagrams of three different redox states<br>of K-phenalenyl complex.....                   | S37 |
| 14. Crystallographic and data collection parameters for <b>1a(CE)</b> , <b>1a(CE)</b> , <b>2</b> .....                    | S39 |
| 15. Reaction Optimization for direct C-H arylation of N-methyl pyrrole<br>with 4-chlorobenzonitrile coupling partner..... | S46 |
| 16. C-H arylation of arenes/heteroarenes with 4-chlorobenzonitrile<br>in absence of catalyst.....                         | S47 |

|                                                                                       |      |
|---------------------------------------------------------------------------------------|------|
| 17. General procedure for C-H arylation of arenes/heteroarenes with aryl halides..... | S48  |
| 18. General procedure for intramolecular coupling reactions.....                      | S48  |
| 19. Radical scavenging experiment in presence of TEMPO.....                           | S49  |
| 20. Radical trapping experiment.....                                                  | S50  |
| 21. The analytical and spectral characterization data of the catalytic products.....  | S51  |
| 22. <sup>1</sup> H and <sup>13</sup> C NMR Spectra of the catalytic products.....     | S66  |
| 23. Mass spectra.....                                                                 | S101 |
| 24. All computational details and theoretically obtained parameter.....               | S104 |
| 25. Coordinates of all DFT optimized structures.....                                  | S117 |
| 26. Reference.....                                                                    | S168 |

## 1. Experimental Section

### Materials and Methods:

All solvents except THF and toluene used in the experiments were distilled from calcium hydride under inert condition prior to use. Toluene and THF were distilled using Na/benzophenone. All chemicals were purchased and used as received. The  $^1\text{H}$ ,  $^{13}\text{C}$  NMR spectra were recorded on 400 and 500 MHz spectrometers in  $\text{CDCl}_3$  with residual undeuterated solvent ( $\text{CDCl}_3$ , 7.26/77.0) as an internal standard. Chemical shifts ( $\delta$ ) are given in ppm, and J values are given in Hz. All chemical shifts were reported in ppm using tetramethylsilane as a reference. Chemical shifts ( $\delta$ ) downfield from the reference standard were assigned positive values. Column chromatography including thin-layer chromatography (TLC) was performed on silica gel (Merck silica gel 100-200 mesh). Evaporation of solvents was performed under reduced pressure using a rotary evaporator. High-resolution mass spectra (HRMS) were obtained on a Bruker maXis impact. ESI-mass spectra were recorded on a water Micro-MS mass spectrometer. EPR spectroscopic measurements were performed in Bruker (X-band) spectrometer. All the glassware and NMR tubes used for experiments were kept in oven at 120 °C for overnight (12h). X-ray crystallographic measurements were performed in Agilent X-ray diffractometer. All chemicals have been directly purchased from Sigma-Aldrich. 9-Hydroxyphenalenone ligand has been prepared by following the literature report<sup>1</sup>. The starting materials for intramolecular coupling reactions have been prepared by following the previous literature<sup>2</sup>.

## 2. Preparation and characterization of phenalenyl ligand and the K-phenalenyl complexes:

### I. Synthesis and characterization PLY(O,O)-K complex (1a and 1a(CE)):

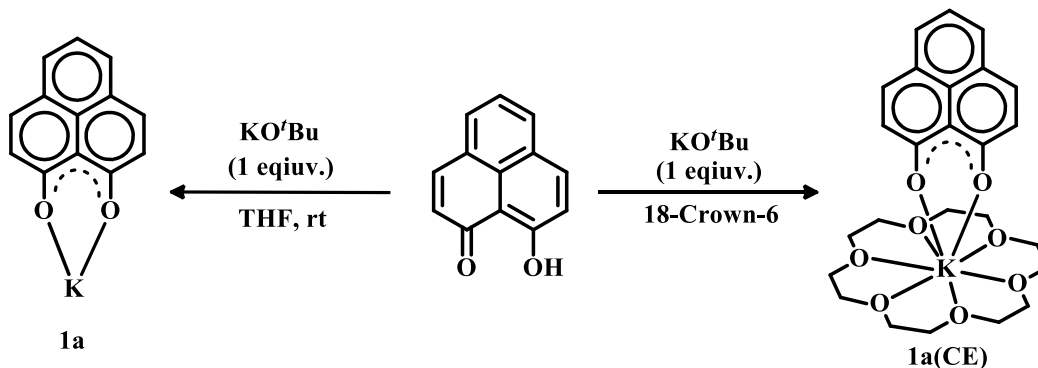

Inside an argon filled glovebox, 0.1 mmol (20 mg) PLY(O,OH), 0.1 mmol (12 mg) KO<sup>t</sup>Bu and 0.12 mmol (25 mg) 18-crown-6 were mixed together with 1.2 mL THF in a glass vial. The reaction mixture was stirred at room temperature for 10 min. The clear reddish solution was transferred to another vial and for crystallization under -35 °C along with 0.5 mL toluene as co-solvent. Rod shaped crystals were grown at overnight standing. A suitable crystal was coated with precooled inert oil and was analyzed by solid state structure. Also it was characterized by NMR spectroscopy.

The **1a** has been prepared following same procedure without adding 18-crown-6 and it was collected as precipitate.

**<sup>1</sup>H NMR** (500 MHz, DMSO-d<sub>6</sub>, 298K)  $\delta$  (ppm) 3.55 (s, 24H), 6.56 (d, 2H,  $J = 8$  Hz), 7.05 (t, 1H,  $J = 6$  Hz), 7.57 (dd, 4H,  $J_1 = 8$  Hz,  $J_2 = 12$  Hz).

**<sup>13</sup>C{<sup>1</sup>H} NMR** (125 MHz, DMSO-d<sub>6</sub>, 298K)  $\delta$  (ppm) 69.9, 115.7, 118.2, 123.5, 129.1, 131.9, 132.3, 135.2, 179.7.

**DEPT 135** (125 MHz, DMSO-d<sub>6</sub>, 298K)  $\delta$  (ppm) 69.9 (s, CH<sub>2</sub>), 118.2 (CH), 129.1 (CH), 131.9 (CH), 135.2 (CH).

## II. Synthesis and characterization PLY(N,O)-K (1b and 1b(CE)):

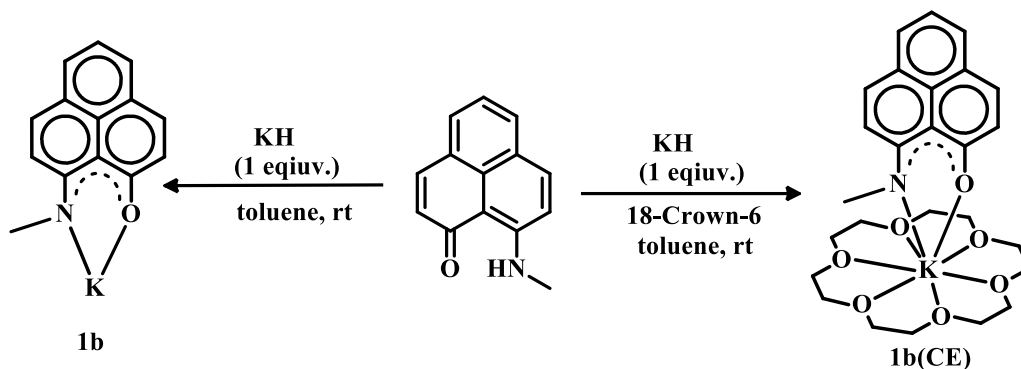

Inside an argon filled glovebox, 0.1 mmol (22 mg) PLY(O,NH), 0.1 mmol (4 mg) KH and 0.12 mmol (25 mg) 18-crown-6 were mixed together with 1.2 mL toluene in a glass vial. The reaction mixture was stirred at room temperature for 2-3 mins. The clear reddish solution was transferred to another vial and for crystallization under  $-35\text{ }^{\circ}\text{C}$  along. Red colored block shaped crystals were grown at overnight standing. A suitable crystal was coated with precooled inert oil and mounted under 100 K and analyzed by solid state structure. Instability of this molecule in DMSO and very low solubility in THF or toluene does not allow us to record the NMR spectrum.

**1b** was prepared following the same procedure without adding 18-crown-6 and it was collected as precipitate.

## III. Synthesis and characterization of PLY(O,O)-K mono-reduced complex (2):

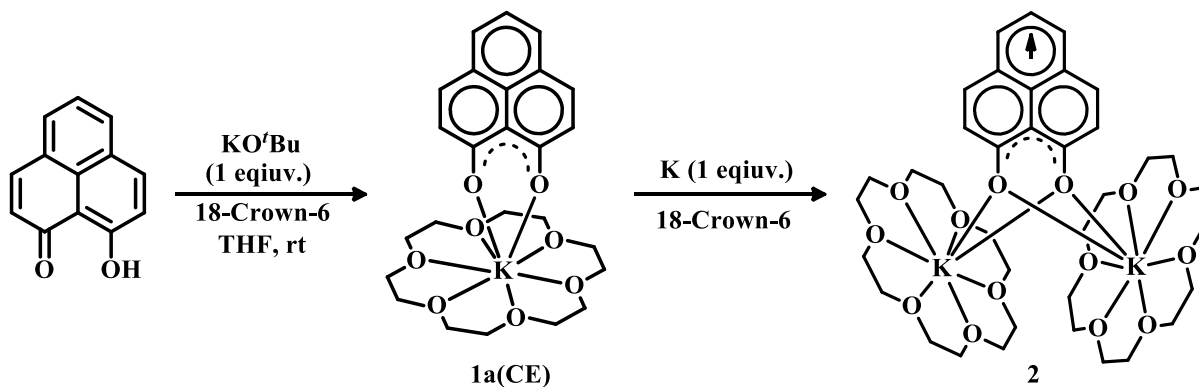

Inside an argon filled glovebox, 0.1 mmol (20 mg) PLY(O,OH), 0.1 mmol (12 mg) KO<sup>t</sup>Bu and 0.12 mmol (25 mg) 18-crown-6 were mixed together with 1.2 mL THF in a glass vial. 0.12 mmol (5 mg) K and 0.12 mmol (25 mg) 18-crown-6 were added in the reaction mixture. The final reaction mixture was stirred for 10 min and the red colored solution slowly turned into a green colored solution. The clear green solution was transferred to another vial and for crystallization under -35 °C along with 0.5 mL toluene as co-solvent. Blocked shaped crystals were grown at overnight standing. A suitable crystal was coated with precooled inert oil and was analyzed by solid state structure.

EPR measurement of this green crystal shows a sharp signal at  $g = 2.0001$  in X-band. NMR spectroscopic measurement shows broad NMR signals in the <sup>1</sup>H NMR spectrum.

#### IV. Synthesis and characterization of doubly-reduced PLY(O,O)-K complex (3):

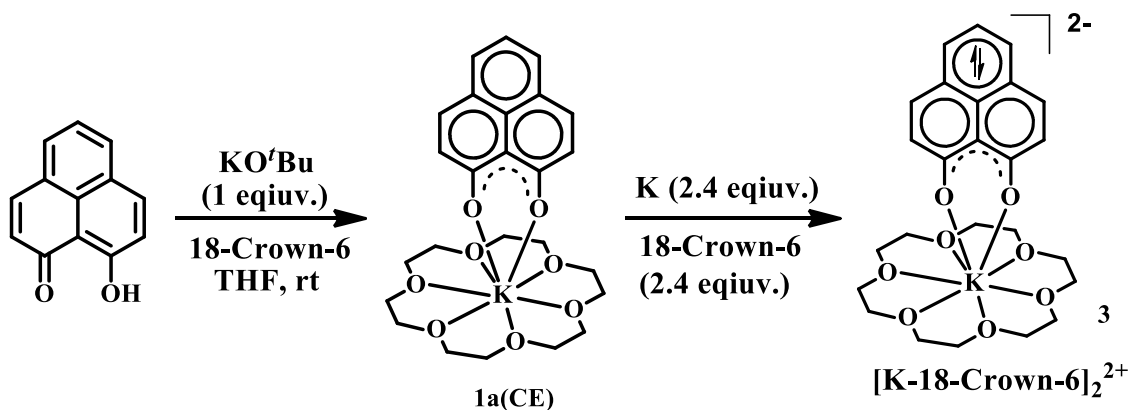

Inside an argon filled glovebox, 0.1 mmol (20 mg) PLY(O,OH), 0.1 mmol (12 mg) KO<sup>t</sup>Bu and 0.12 mmol (25 mg) 18-crown-6 were mixed together with 2 mL THF in a glass vial. 0.24 mmol (12 mg) K and 0.24 mmol (50 mg) 18-crown-6 were added in the reaction mixture. The final reaction mixture was stirred at room temperature, after 10 min the red colored solution slowly turned into a green colored solution and after another 15 min, this green color slowly turns into

dark brown solution. EPR measurement of this brown colored solution shows it as EPR silent.  $^1\text{H}$  NMR spectroscopic measurement of this brown solution shows resonance signal at upfield region with respect to the neutral PLY(O,O)-K (Figure S10).

### V. Trapping and characterization of doubly-reduced PLY(O,O)-K:

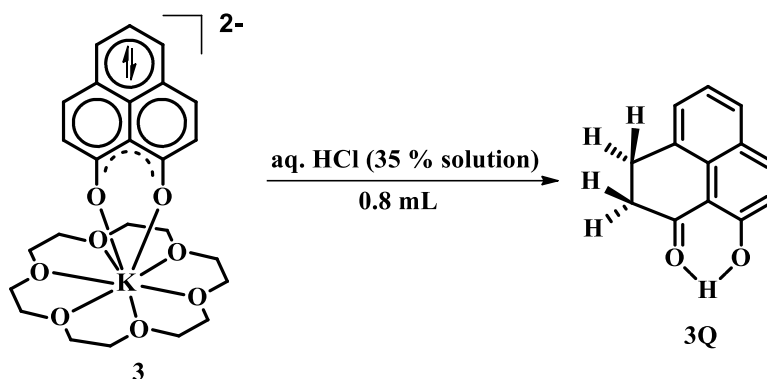

Inside an argon filled glovebox, 0.1 mmol (20 mg) PLY(O,OH), 0.1 mmol (12 mg) KO<sup>t</sup>Bu and 0.12 mmol (25 mg) 18-crown-6 were mixed together with 2 mL THF in a glass vial. 0.24 mmol (12 mg) K and 0.24 mmol (50 mg) 18-crown-6 were added in the reaction mixture. The final reaction mixture was stirred at room temperature, after 10 min, the red colored solution slowly turned into a green colored solution and after another 15 min, this green color slowly turns into dark brown solution. 0.8 mL aq. HCl solution (35%) was added into that brown solution. The organic compound was extracted in ethylacetate from water and after solvent evaporation, the organic compound was dried. The product was isolated from column chromatography using hexane as eluent over silica. The isolated product was characterized by mass and NMR spectroscopic measurements.



$^1\text{H NMR}$  (500 MHz,  $\text{CDCl}_3$ , 298K)  $\delta$  (ppm) 2.94 (t, 2H,  $J = 6$  Hz), 3.33 (t, 2H,  $J = 6$  Hz), 7.16 (d, 1H,  $J = 10$  Hz), 7.33 (t, 1H,  $J = 7$  Hz), 7.41 (d, 1H,  $J = 8$  Hz), 7.66 (d, 1H,  $J = 8.4$  Hz), 7.97 (d, 1H,  $J = 8.2$  Hz), 13.1 (s, 1H).

$^{13}\text{C}\{^1\text{H}\}$  NMR (125 MHz,  $\text{CDCl}_3$ , 298K)  $\delta$  (ppm) 27.6, 37.1, 110.2, 119.3, 124.0, 126.6, 126.7, 127.1, 130.7, 131.6, 138.1, 162.5, 203.8.

DEPT 135 (125 MHz,  $\text{CDCl}_3$ , 298K)  $\delta$  (ppm) 27.6 (CH<sub>2</sub>), 37.1 (CH<sub>2</sub>), 119.3 (CH), 124.0 (CH), 126.6 (CH), 126.7 (CH), 138.1 (CH).

## VI. Trapping and characterization of deuterium leveled doubly-reduced PLY(O,O)-K:

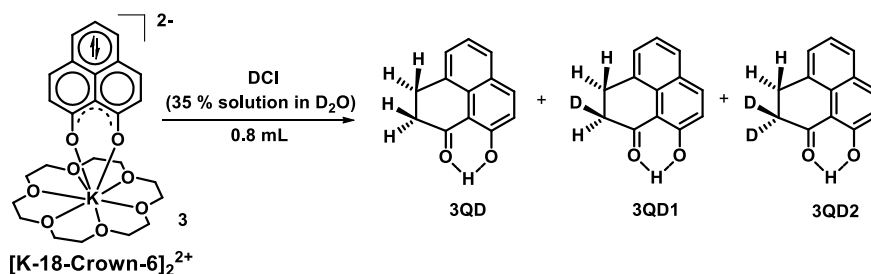

Inside an argon filled glovebox, 0.1 mmol (20 mg) PLY(O,OH), 0.1 mmol (12 mg) KO<sup>t</sup>Bu and 0.12 mmol (25 mg) 18-crown-6 were mixed together with 2 mL THF in a glass vial. 0.24 mmol (12 mg) K and 0.24 mmol (50 mg) 18-crown-6 were added to the reaction mixture. The final reaction mixture was stirred at room temperature, after 10 min, the red colored solution slowly turned into green colored solution and after another 15 min this green color slowly turned into dark brown solution. 0.8 mL DCI solution (35% in D<sub>2</sub>O) was added into that brown solution. The organic compound was extracted in ethyl acetate from water, after solvent evaporation the organic compound was dried. The reaction mixture was subjected to the mass spectrometric measurement

(HRMS). The mass spectrum shows the presence of non-deuterated, mono-deuterated and di-deuterated quenched species along with these we could found PLY(O,OH). The mass spectrum has been presented in Figure S17.

The product was isolated by column chromatography using hexane as eluent over silica. The isolated product was characterized by mass and NMR spectroscopic measurements.

**<sup>1</sup>H NMR** (500 MHz, CDCl<sub>3</sub>, 298K)  $\delta$  (ppm) 2.94 (m, 0.73 H), 3.33 (m, 2.34H), 7.16 (d, 1H,  $J$  = 10 Hz), 7.33 (t, 1H,  $J$  = 7 Hz), 7.41 (d, 1H,  $J$  = 8 Hz), 7.66 (d, 1H,  $J$  = 8.4 Hz), 7.97 (d, 1H,  $J$  = 8.2 Hz), 13.1 (s, 1H).

**DEPT 135** (125 MHz, CDCl<sub>3</sub>, 298K)  $\delta$  (ppm) 27.6 (CH<sub>2</sub>, m), 37.1 (CH, d), 119.3 (CH), 124.0 (CH), 126.6 (CH), 126.7 (CH), 138.1 (CH).

**<sup>2</sup>D NMR** (500 MHz, CHCl<sub>3</sub>, 298K)  $\delta$  (ppm) 2.93 (s, CD<sub>2</sub>).

### 3. Cyclic voltammetric study:

Cyclic voltammetric study of PLY(O,O)-K complex (**1a**) was carried out in  $NnBu_4ClO_4$  0.1 M solution in DMF using Ag/AgCl reference electrode with  $100mVs^{-1}$  at room temperature under  $N_2$  atmosphere.

a)

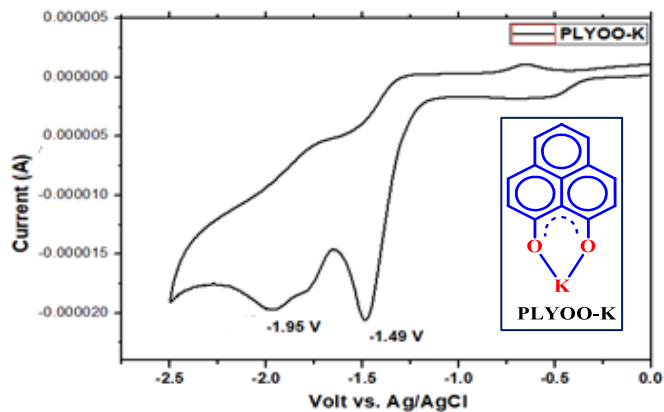

b)

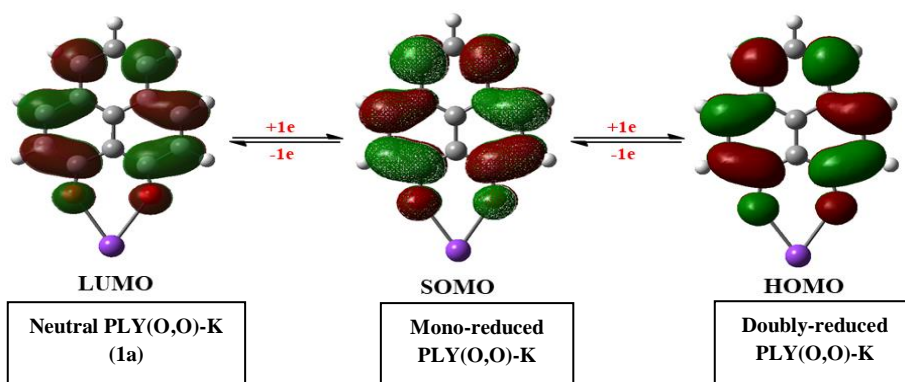

**Figure S1.** a) Cyclic voltammogram of **1a**; b) Frontier Molecular Orbital (FMO) diagram of three different redox states.

4.  $^1\text{H}$ ,  $^{13}\text{C}$  NMR spectra and mass spectra of various phenalenyl species and K-complexes:

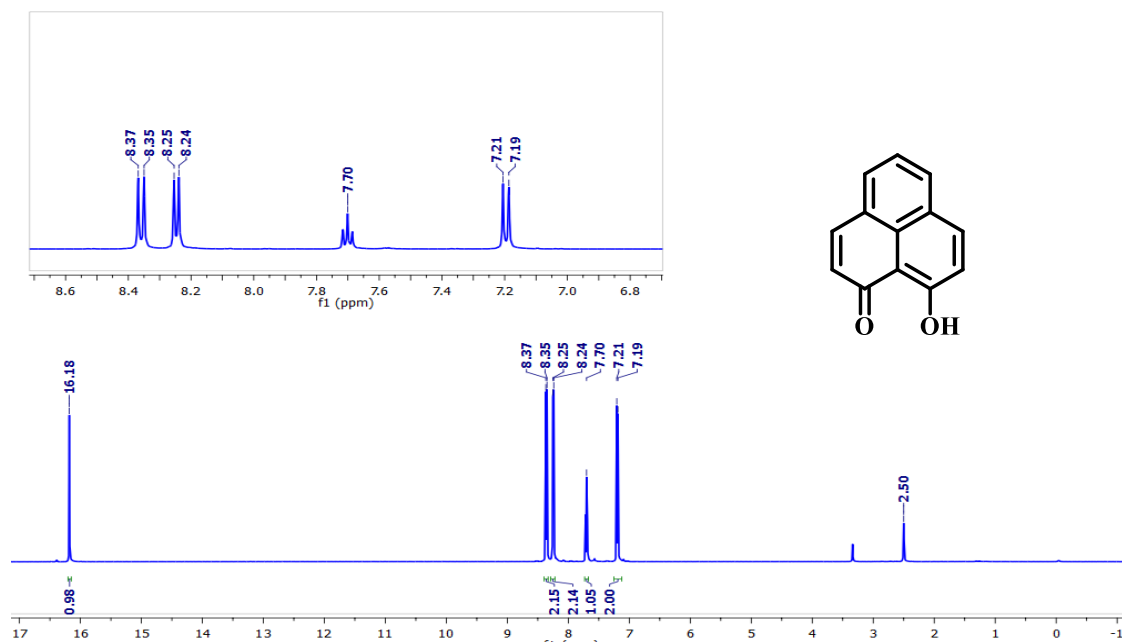

Figure S2.  $^1\text{H}$  NMR ( $\text{CDCl}_3$ ) spectrum of 9-hydroxyphenalenone (PLY(OH,O)).

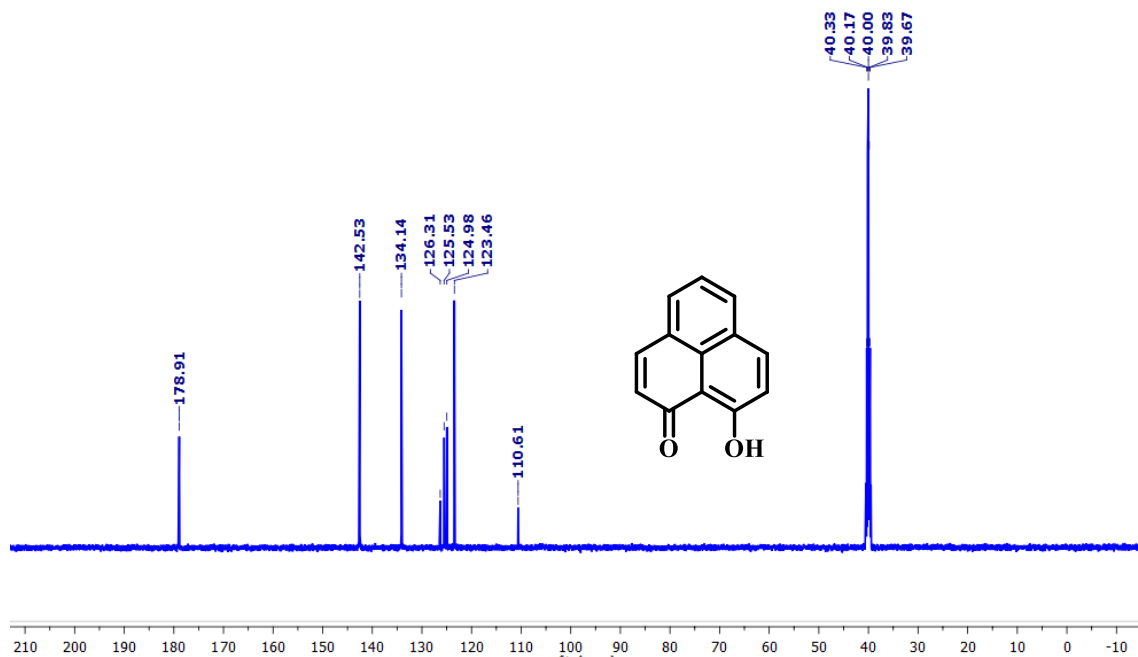

Figure S3.  $^{13}\text{C}$  NMR ( $\text{CDCl}_3$ ) spectrum of 9-hydroxyphenalenone (PLY(OH,O)).

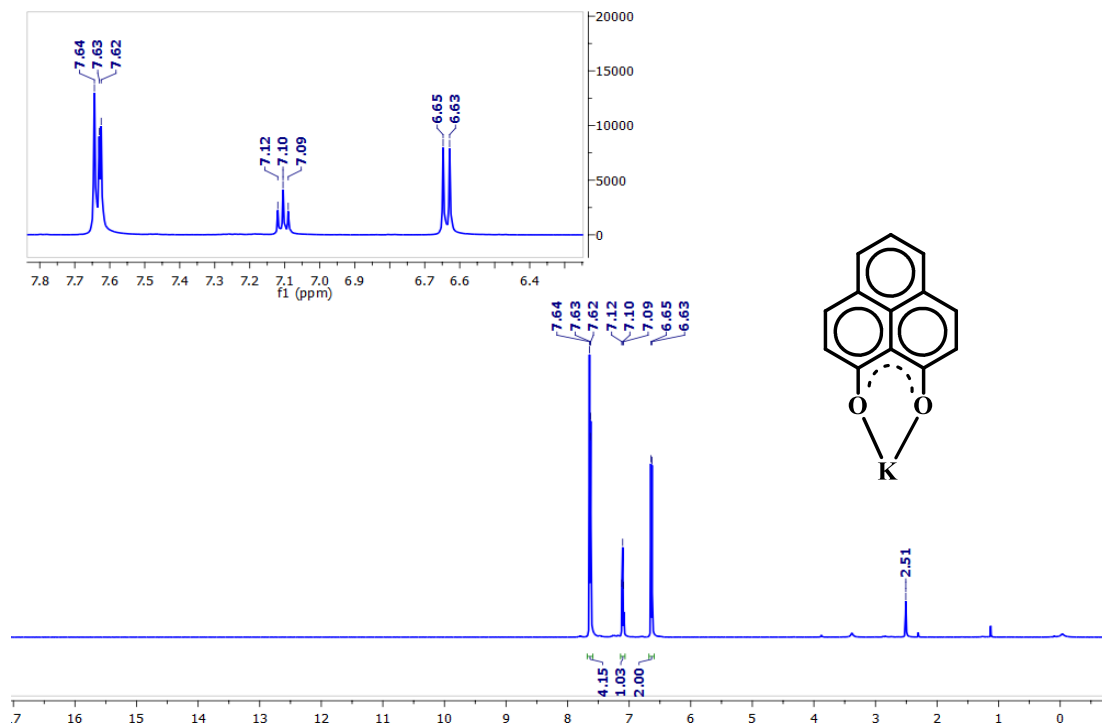

**Figure S4.**  $^1\text{H}$  NMR (DMSO- $d_6$ ) spectrum of PLY(O,O)-K complex (**1a**).

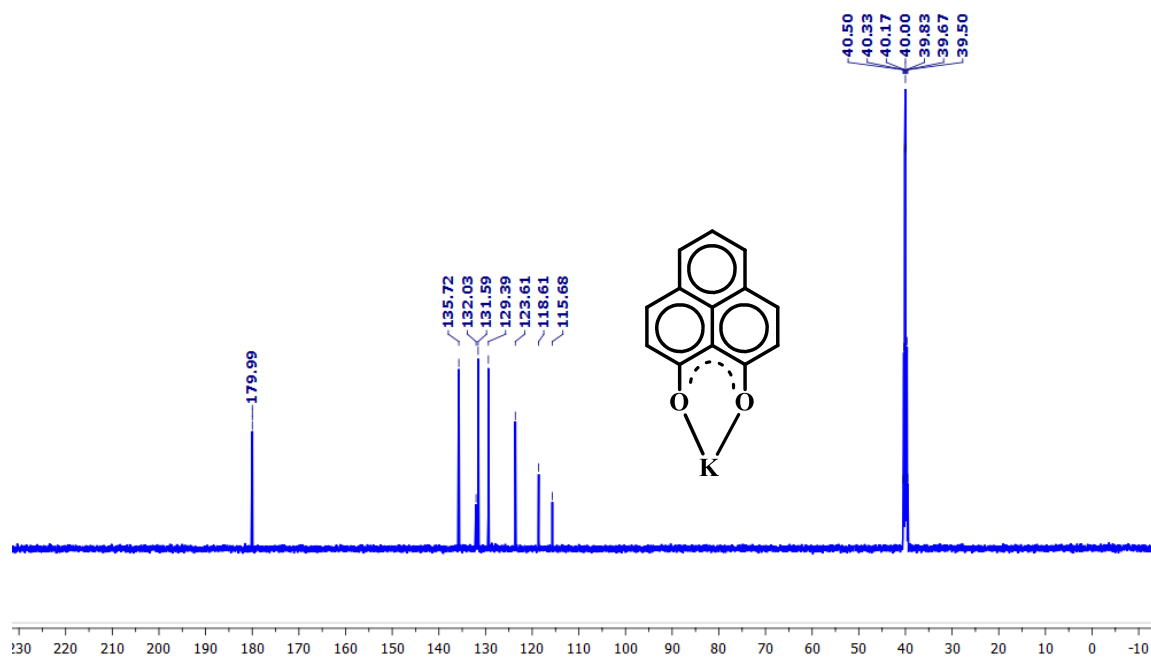

**Figure S5.**  $^{13}\text{C}$  NMR (DMSO- $d_6$ ) spectrum of PLY(O,O)-K complex (**1a**).

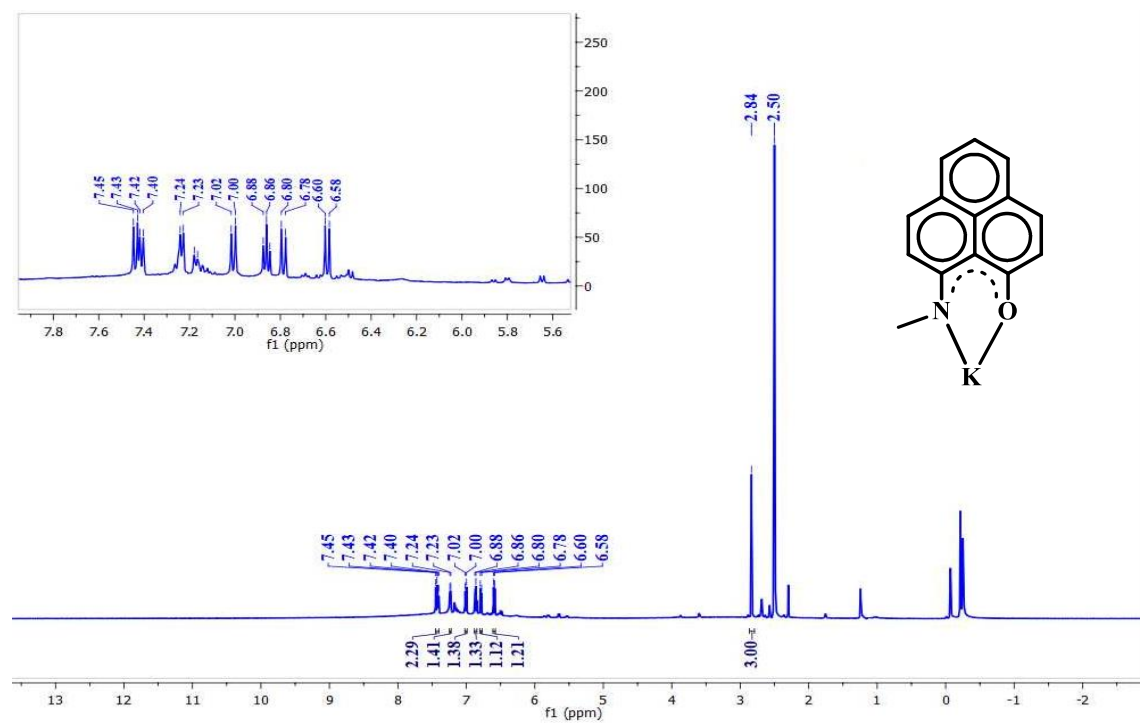

**Figure S6.**  $^1\text{H}$  NMR ( $\text{DMSO-d}_6$ ) spectrum of PLY(N,O)-K complex (1b)

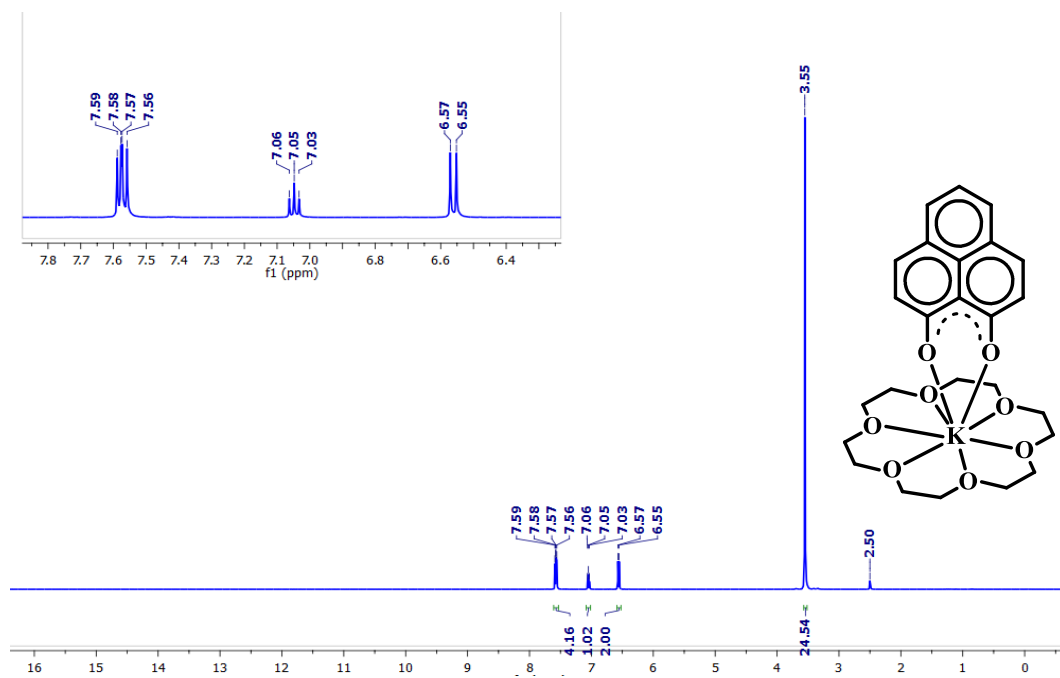

**Figure S7.**  $^1\text{H}$  NMR ( $\text{DMSO-d}_6$ ) spectrum of PLY(O,O)-K(18-crown-6) complex (1a(CE)).

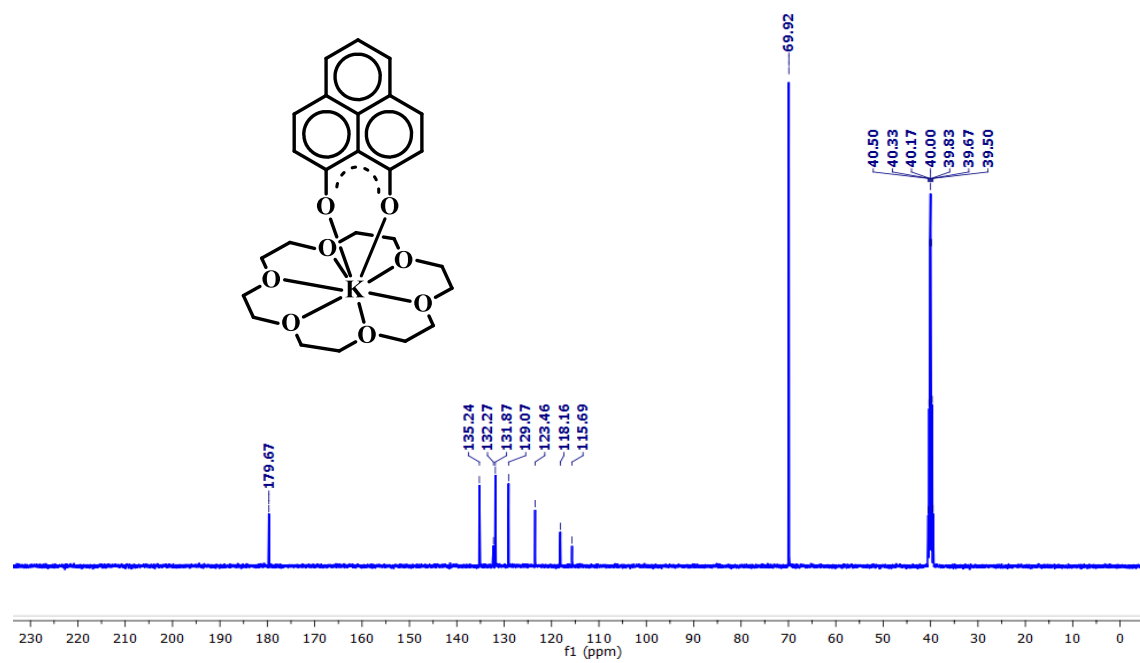

**Figure S8.**  $^{13}\text{C}$  NMR ( $\text{DMSO-d}_6$ ) spectrum of PLY(O,O)-K(18-crown-6) complex (**1a(CE)**).

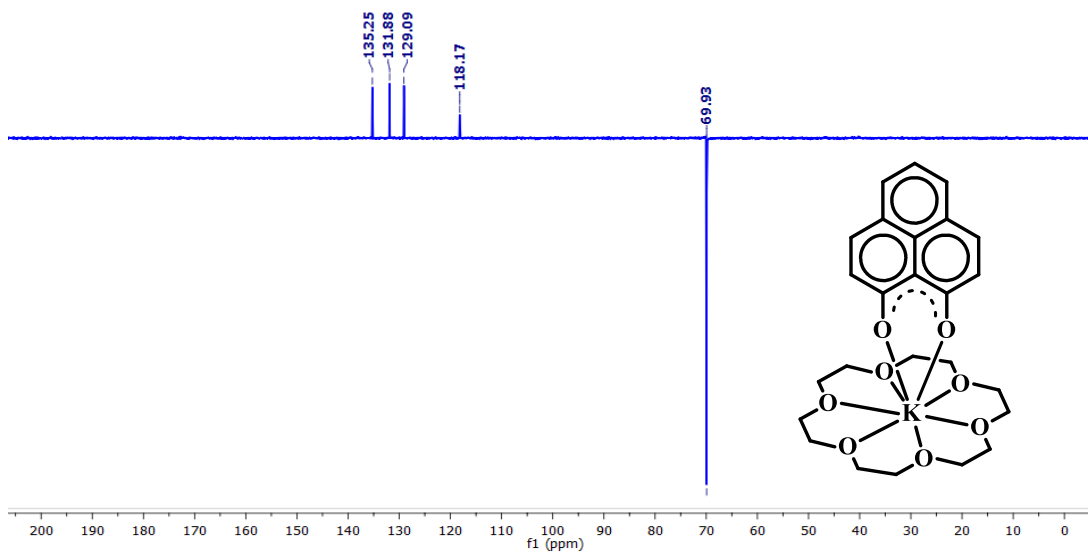

**Figure S9.** ( $^{13}\text{C}$ ) DEPT 135 NMR ( $\text{DMSO-d}_6$ ) spectrum of PLY(O,O)-K(18-crown-6) complex (**1a(CE)**).

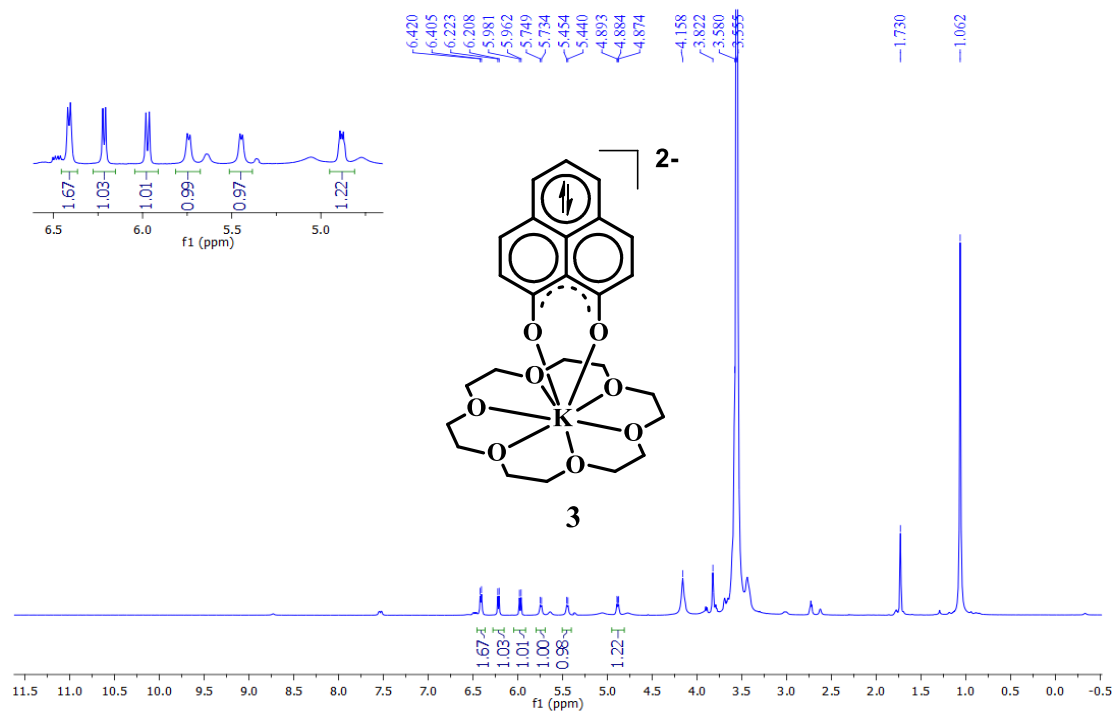

**Figure S10.** <sup>1</sup>H NMR (THF-d<sub>8</sub>) spectrum of reaction mixture of doubly-reduced PLY species **3**.

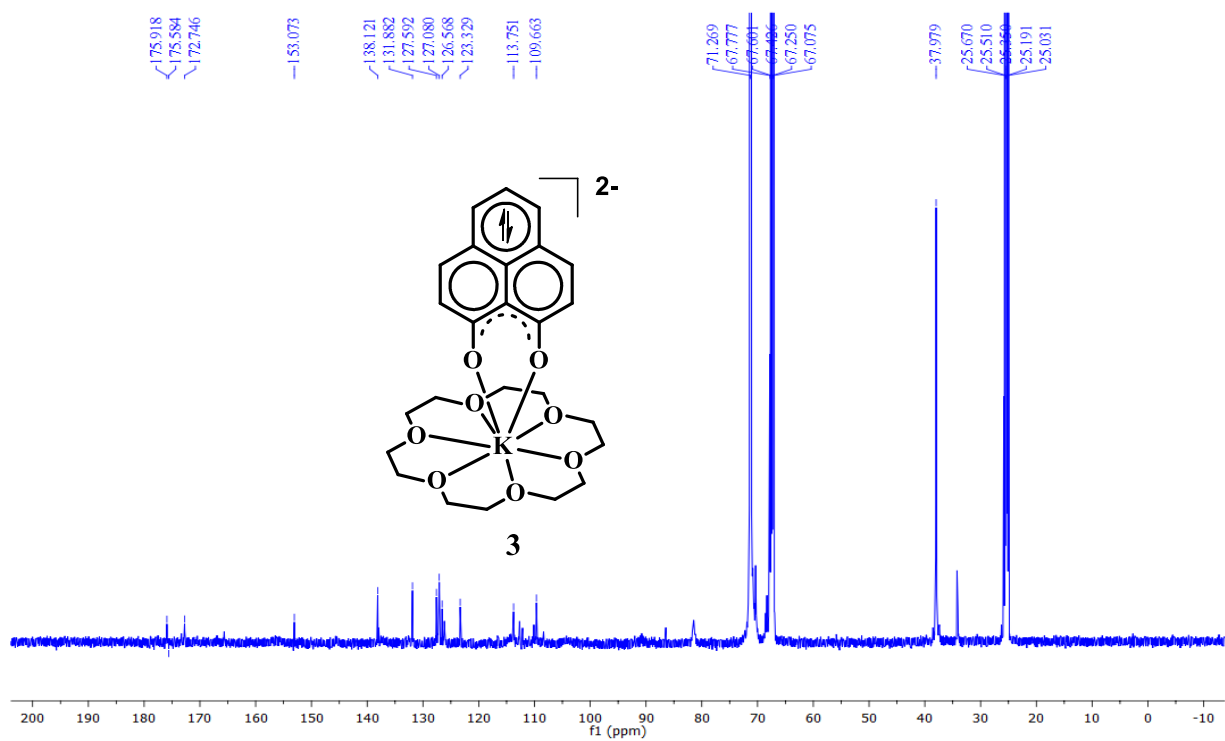

**Figure S11.** <sup>13</sup>C NMR (THF-d<sub>8</sub>) spectrum of reaction mixture of doubly-reduced PLY species **3**.



NMR files  
 GROUP SKM  
 SKM-JM-DR in THF-d8  
 DEPT-135

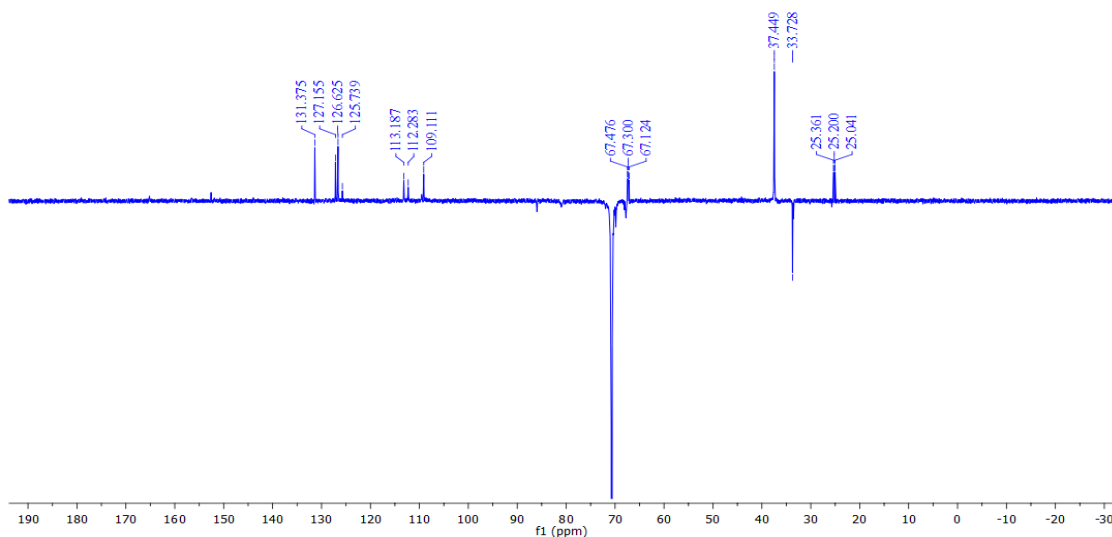

**Figure S12.** ( $^{13}\text{C}$ ) DEPT 135 NMR (THF- $d_8$ ) spectrum of reaction mixture of doubly-reduced PLY species 3.

GROUP SKM  
 SKM-JM-DR1 in THF-d8

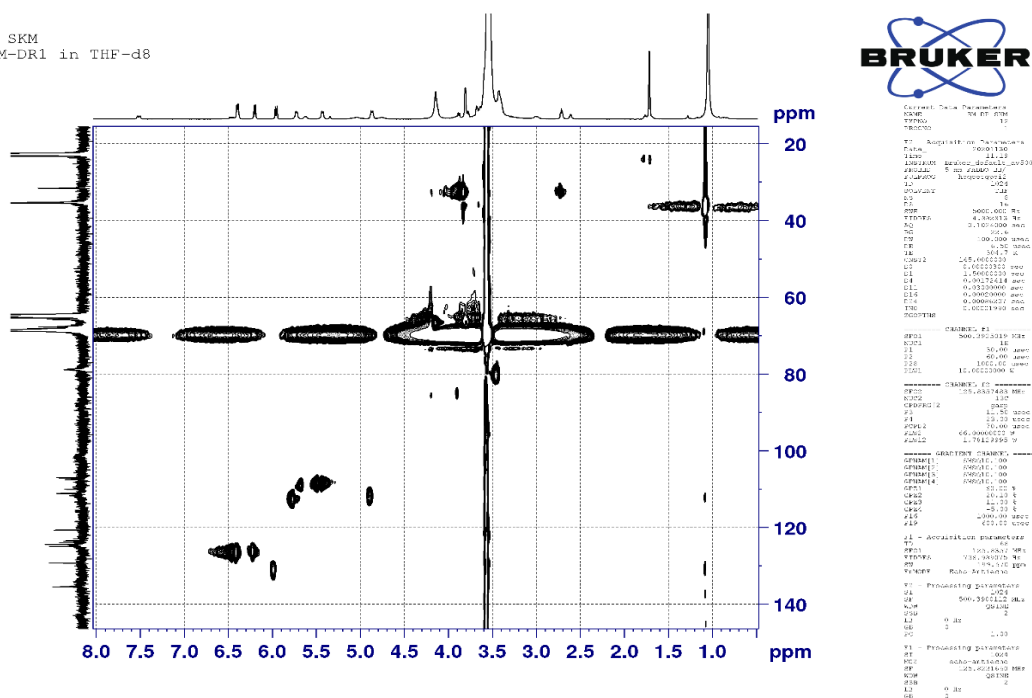

**Figure S13.** HSQC NMR (THF- $d_8$ ) spectrum of reaction mixture of doubly-reduced PLY species 3.

3.

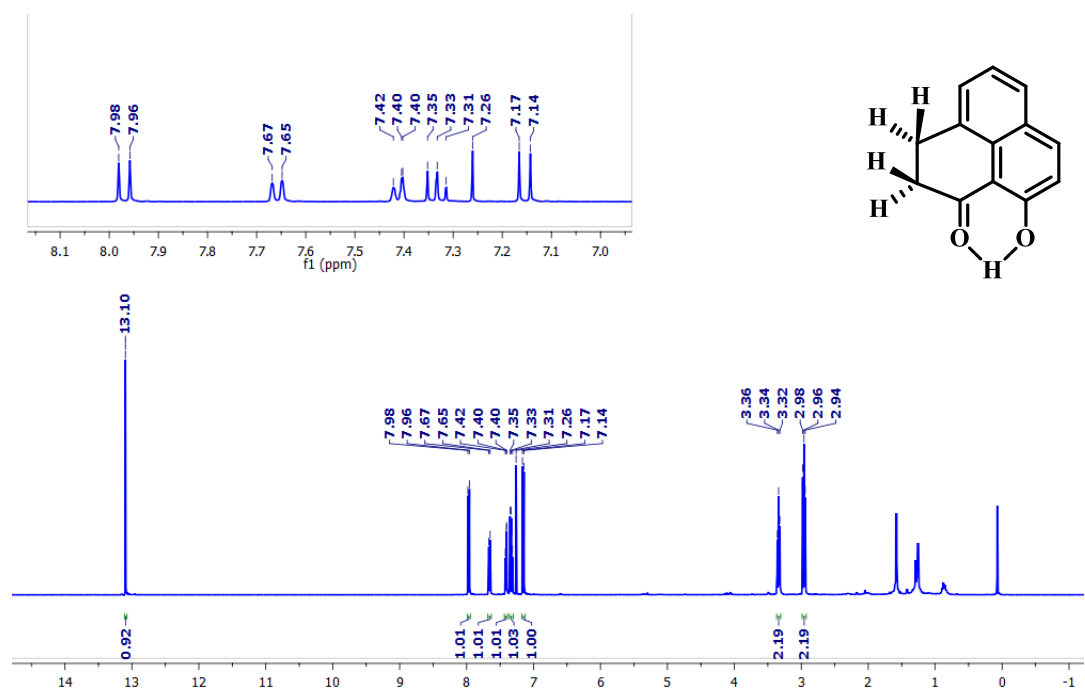

**Figure S14.** <sup>1</sup>H NMR (CDCl<sub>3</sub>) spectrum of quenched PLY(O,O) (**3Q**).

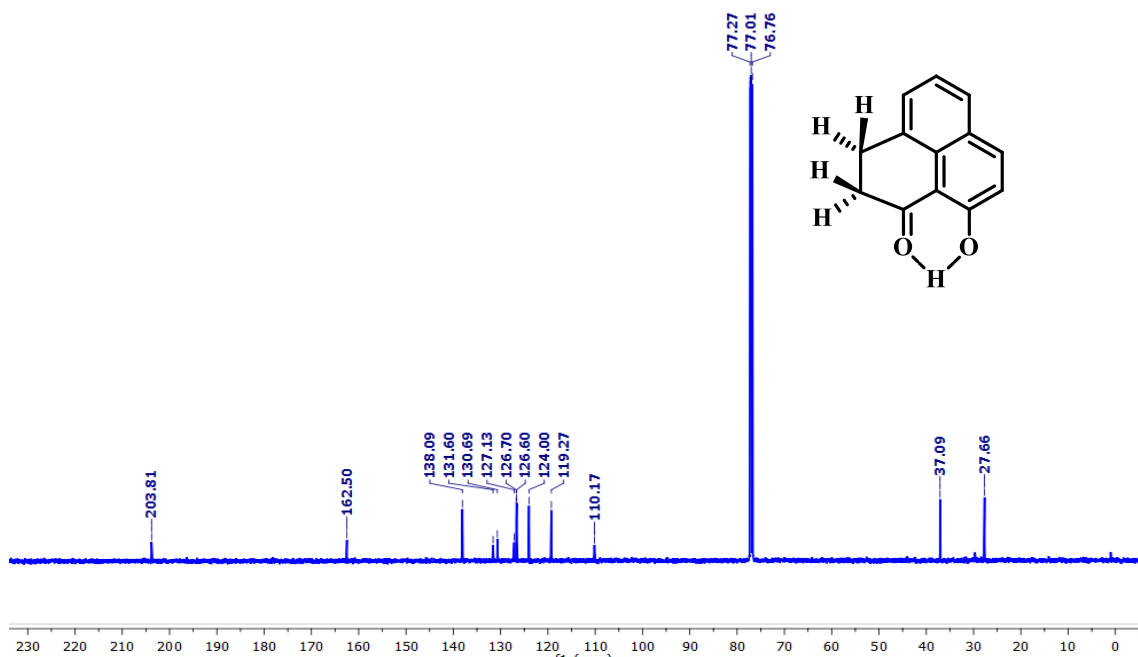

**Figure S15.** <sup>13</sup>C NMR (CDCl<sub>3</sub>) spectrum of quenched PLY(O,O) (**3Q**).

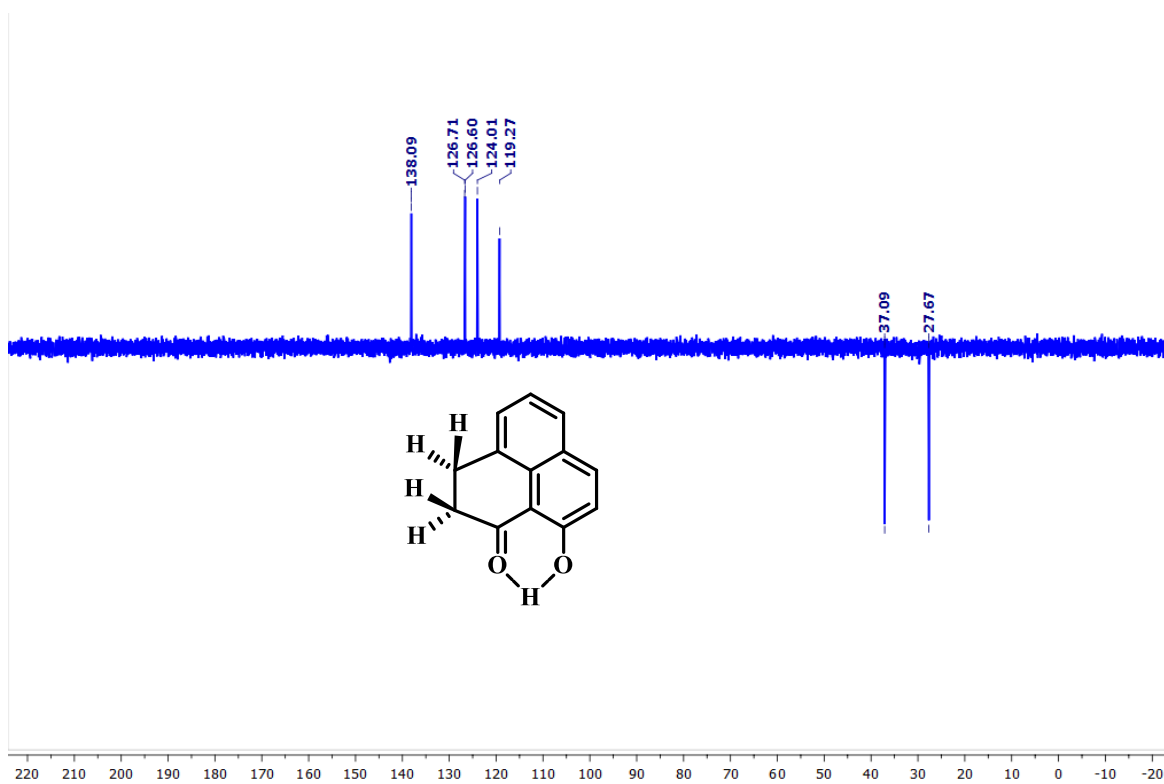

**Figure S16.** ( $^{13}\text{C}$ ) DEPT135 NMR ( $\text{CDCl}_3$ ) spectrum of quenched PLY(O,O) (**3Q**).

## Display Report

**Analysis Info**

Analysis Name D:\Data\User data\2020\NOV\skm-jmd1.d  
 Method Tune\_pos\_Standard.m  
 Sample Name skm-jmd1  
 Comment

Acquisition Date 12/9/2020 2:51:52 PM  
 Operator IISER Kolkata  
 Instrument maXis impact 8282001.00127

**Acquisition Parameter**

|             |          |                      |          |                  |           |
|-------------|----------|----------------------|----------|------------------|-----------|
| Source Type | ESI      | Ion Polarity         | Positive | Set Nebulizer    | 0.5 Bar   |
| Focus       | Active   | Set Capillary        | 3400 V   | Set Dry Heater   | 200 °C    |
| Scan Begin  | 50 m/z   | Set End Plate Offset | -500 V   | Set Dry Gas      | 4.0 l/min |
| Scan End    | 1000 m/z | Set Charging Voltage | 2000 V   | Set Divert Valve | Source    |
|             |          | Set Corona           | 0 nA     | Set APCI Heater  | 0 °C      |

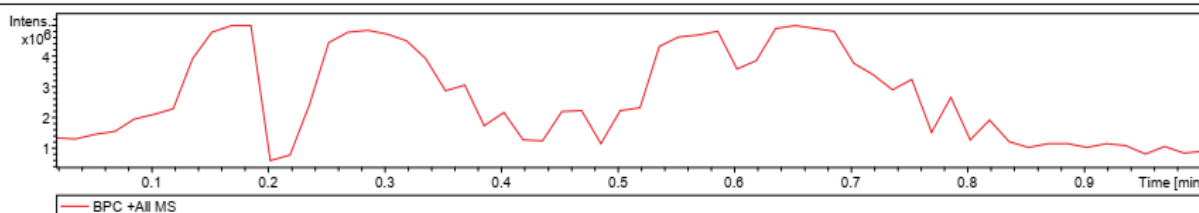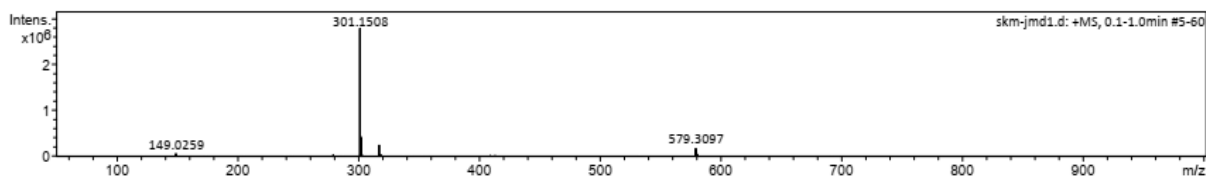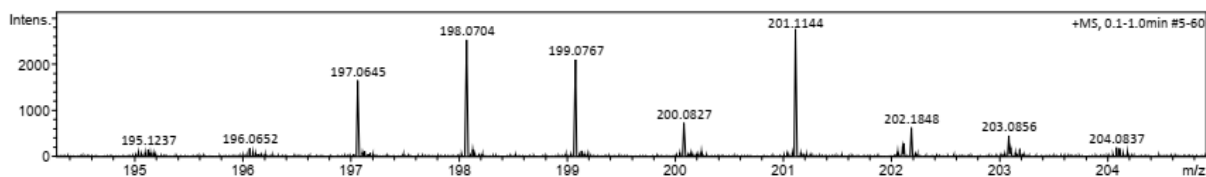

skm-jmd1.d

Bruker Compass DataAnalysis 4.1

printed: 12/9/2020 5:25:52 PM

by: IISER Kolkata

Page 1 of 1

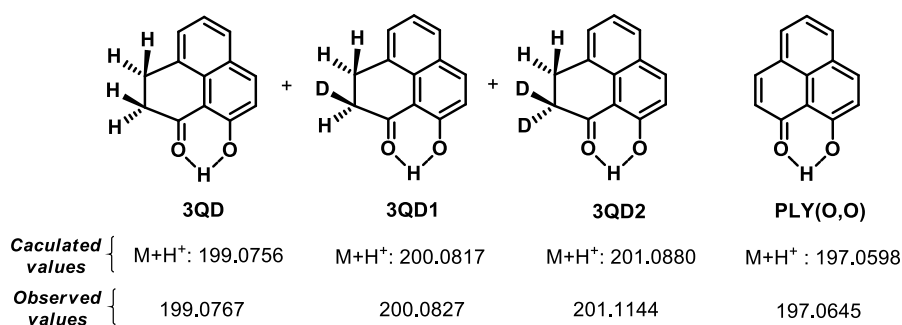

**Figure S17.** Mass spectrum of reaction mixture of quenched PLY(O,O) with DCI.

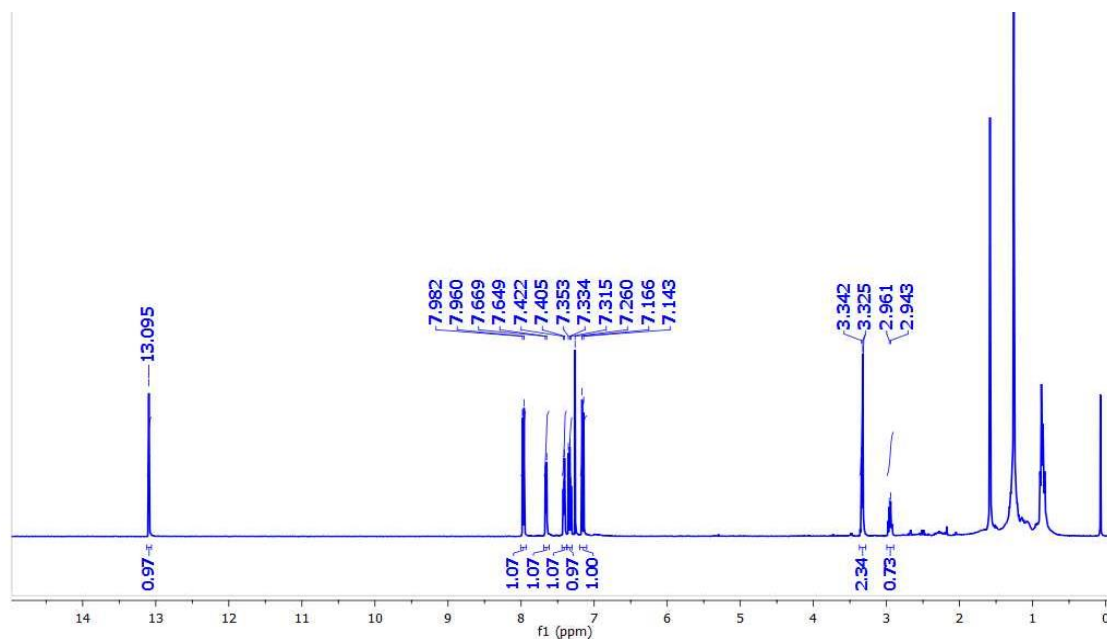

**Figure S18.**  $^1\text{H}$  NMR ( $\text{CDCl}_3$ ) spectrum of quenched PLY(O,O) with DCI (35% solution in  $\text{D}_2\text{O}$ ).

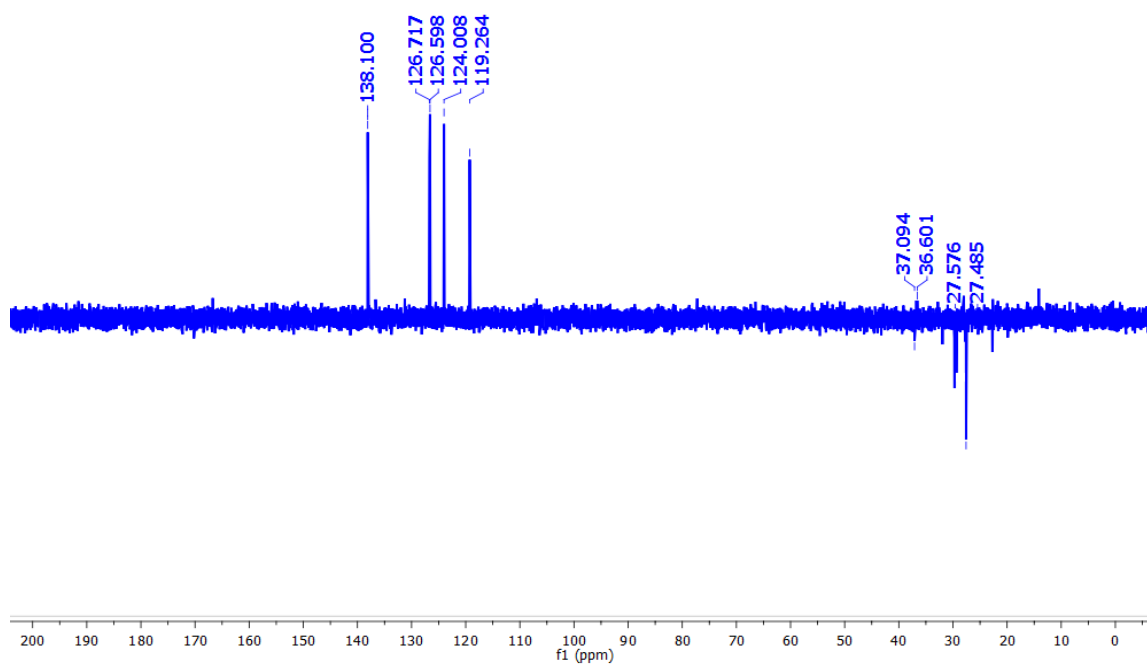

**Figure S19.** ( $^{13}\text{C}$ ) DEPT 135 NMR ( $\text{CDCl}_3$ ) spectrum of quenched PLY(O,O) with DCI (35% solution in  $\text{D}_2\text{O}$ ) (**3QD**).

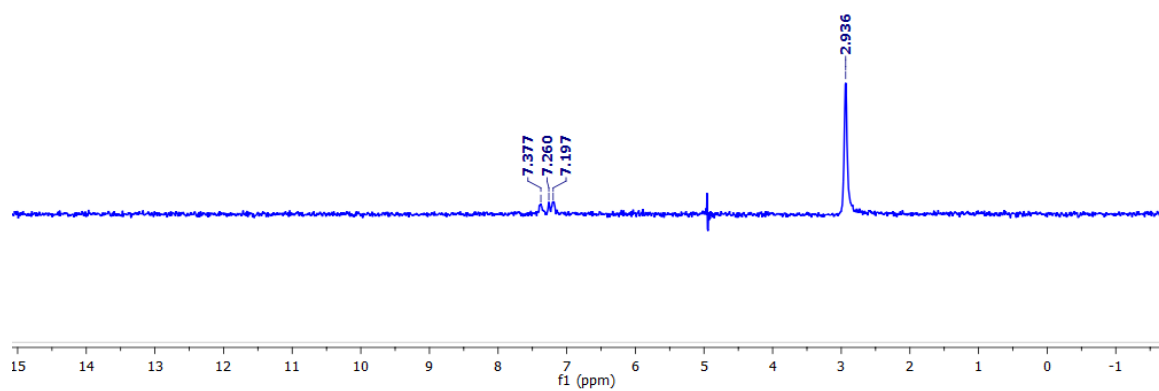

**Figure S20.** 1D NMR ( $\text{CHCl}_3$ ) spectrum of quenched PLY(O,OH) with DCI (35% solution in  $\text{D}_2\text{O}$ ).

**Acquisition Parameter**

|             |          |                      |          |                  |           |
|-------------|----------|----------------------|----------|------------------|-----------|
| Source Type | ESI      | Ion Polarity         | Positive | Set Nebulizer    | 0.3 Bar   |
| Focus       | Active   | Set Capillary        | 3400 V   | Set Dry Heater   | 200 °C    |
| Scan Begin  | 50 m/z   | Set End Plate Offset | -500 V   | Set Dry Gas      | 4.0 l/min |
| Scan End    | 1000 m/z | Set Charging Voltage | 2000 V   | Set Divert Valve | Source    |
|             |          | Set Corona           | 0 nA     | Set APCI Heater  | 0 °C      |

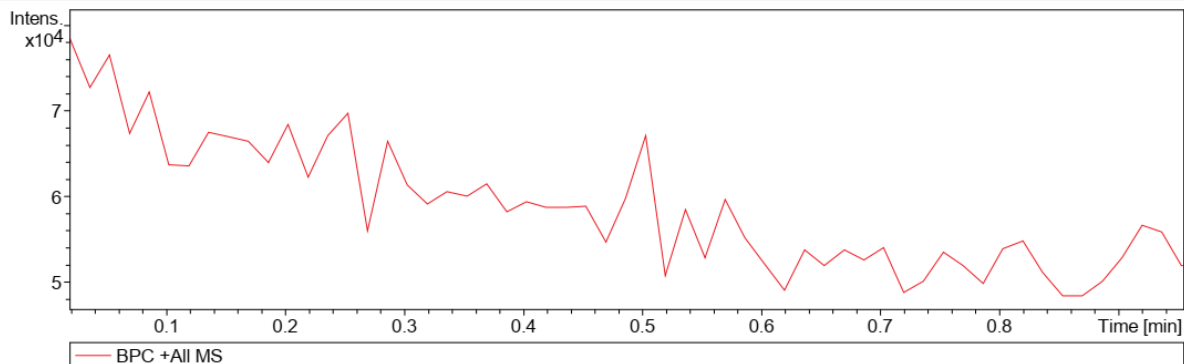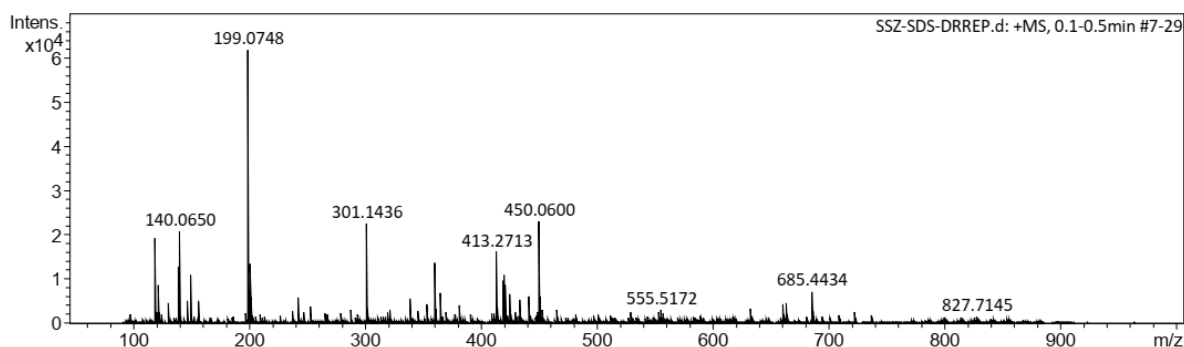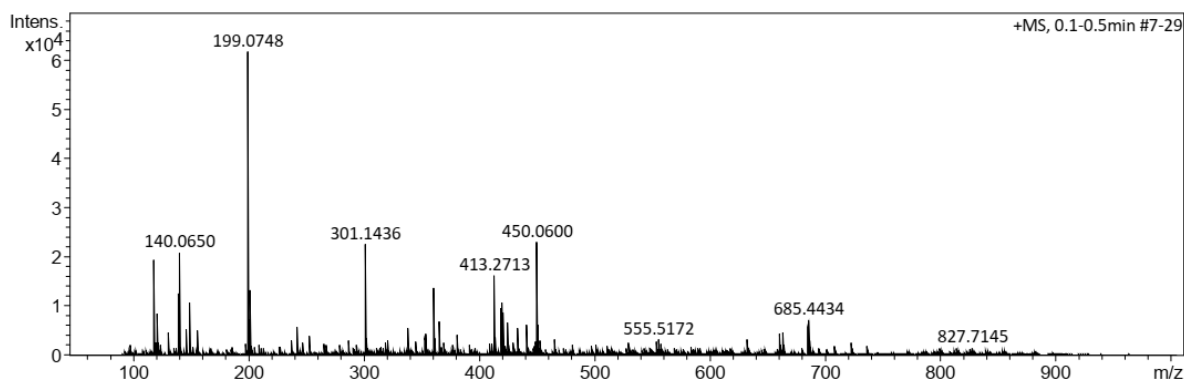

**Figure S21.** Mass Spectrum of quenched PLY(O,O) (**3Q**).

## 5. Computational Details:

Theoretical calculations were performed with the Gaussian16 program suite<sup>3</sup>. All theoretical calculations were carried out using the density functional theory (DFT) method with Becke's three-parameter hybrid exchange functionals and the Lee-Yang-Parr correlation functional (B3LYP) employing the 6-31G(d) basis set<sup>4-5</sup> for all atoms. Anisotropic Induced Current Density (ACID) plots (B3LYP/6-311g(d,p)) were calculated by using the method developed by Herges and only  $\pi$ -orbitals are considered. CSGT NMR calculation was performed for this ACID plots<sup>6,7</sup>. The plots were generated using with AICD-3.0.2 version with threshold vector 1.5 Å and isovalue 0.04. Nuclear Independent Chemical Shift (NICS) values were calculated (B3LYP/6-311G(d,p)) using the standard GIAO procedure<sup>8</sup>. CPCM solvent model has been used in these calculations<sup>9</sup>.



## 6. Theoretically predicted $^1\text{H}$ NMR spectra:

Structure of neutral PLY(O,O)-K complex and doubly-reduced **3** have been optimized by DFT at the level of B3LYP with basis set 6-31+g(d,p).  $^1\text{H}$  NMR resonances have been predicted by GIAO method considering THF(CPCM) as solvent model.

### Neutral PLY(O,O)-K complex (1a):

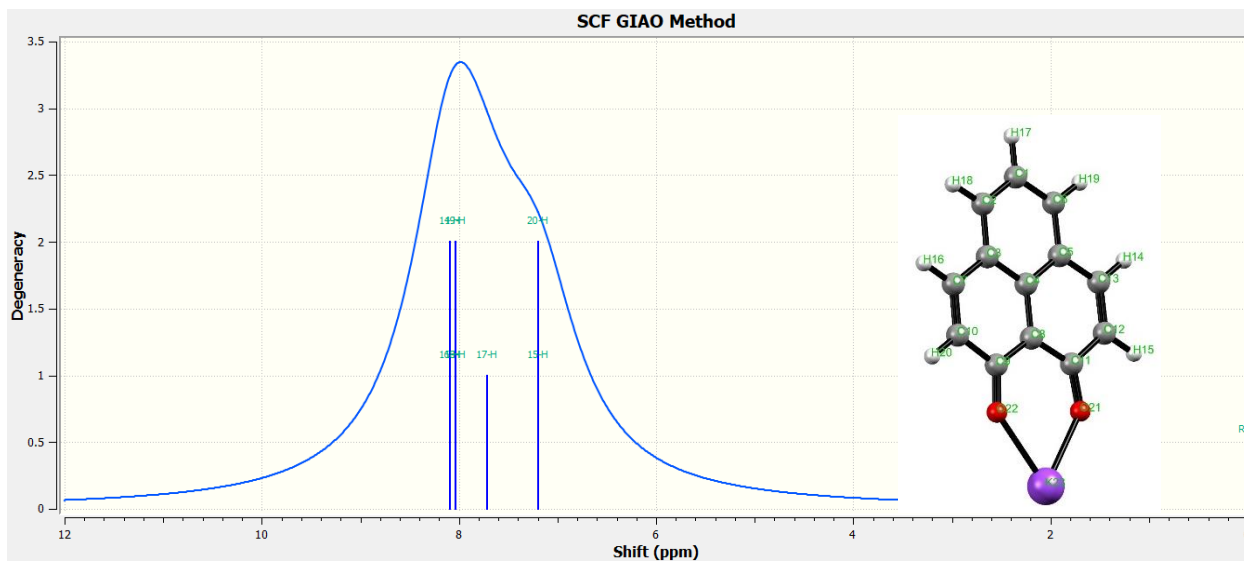

### Doubly-reduced PLY(O,O)-K complex:

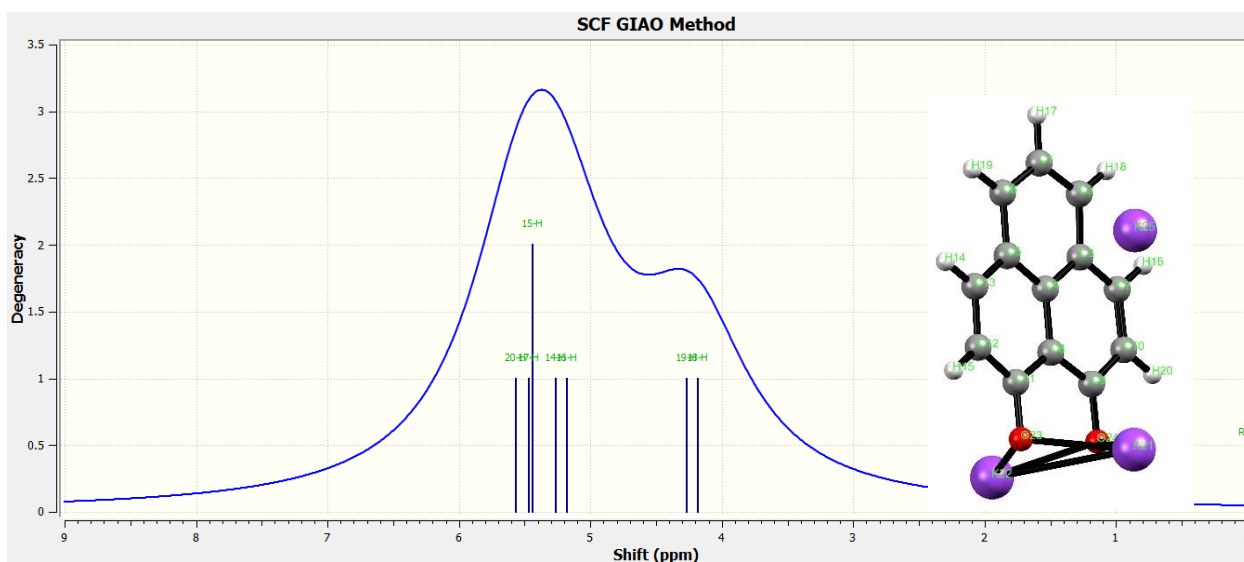

## 7. Electrostatic potential maps of PLY(N,O)-K:

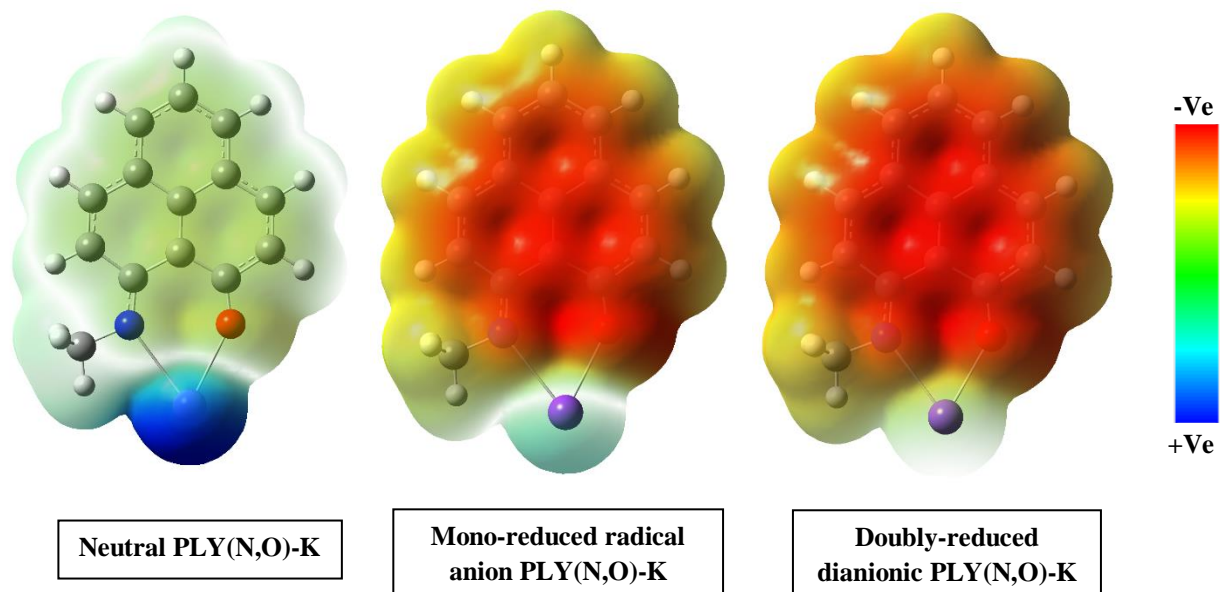

**Figure S22:** Electrostatic potential maps of three redox states of PLY(N,O)-K complex (Isovalue = 0.002).

## 8. Anisotropic Induced Current Density (AICD) plots:

a) Neutral PLY(O,O)-K complex (**1a**):

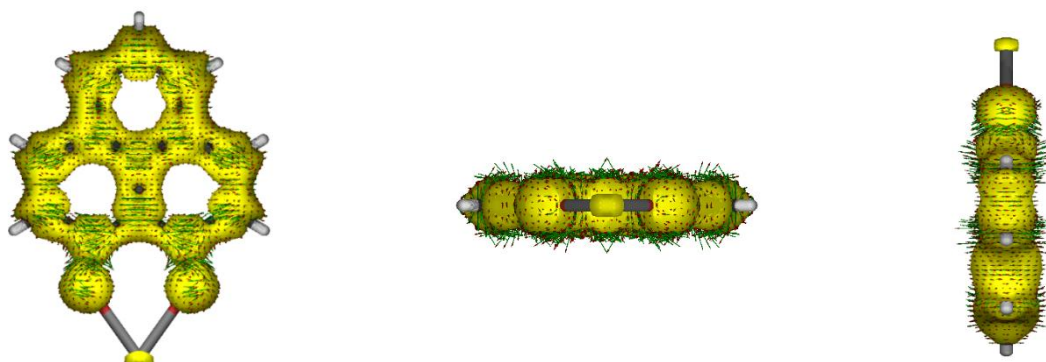

b) Mono-reduced PLY(O,O)-K complex:

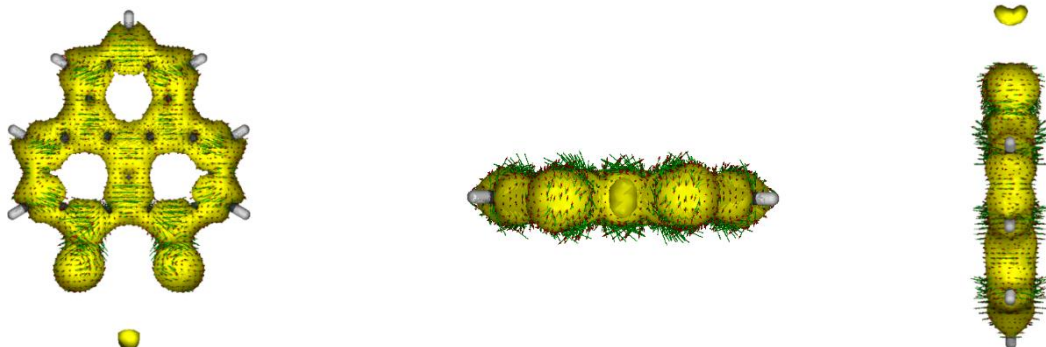

c) Doubly-reduced PLY(O,O)-K complex:

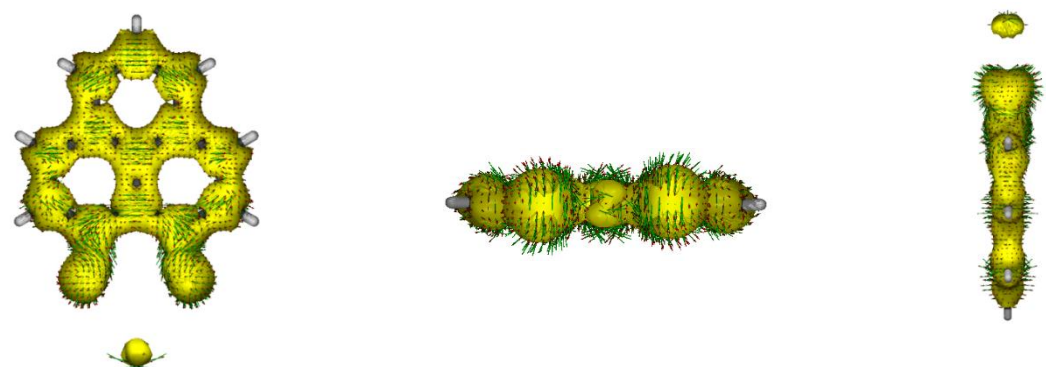

**Figure S23.** Three different views of AICD plots of different redox states of PLY(O,O)-K complex, a) For neutral PLY(O,O)-K complex (**1a**); b) For mono-reduced radical PLY(O,O)-K complex; c) For doubly-reduced PLY(O,O)-K complex.

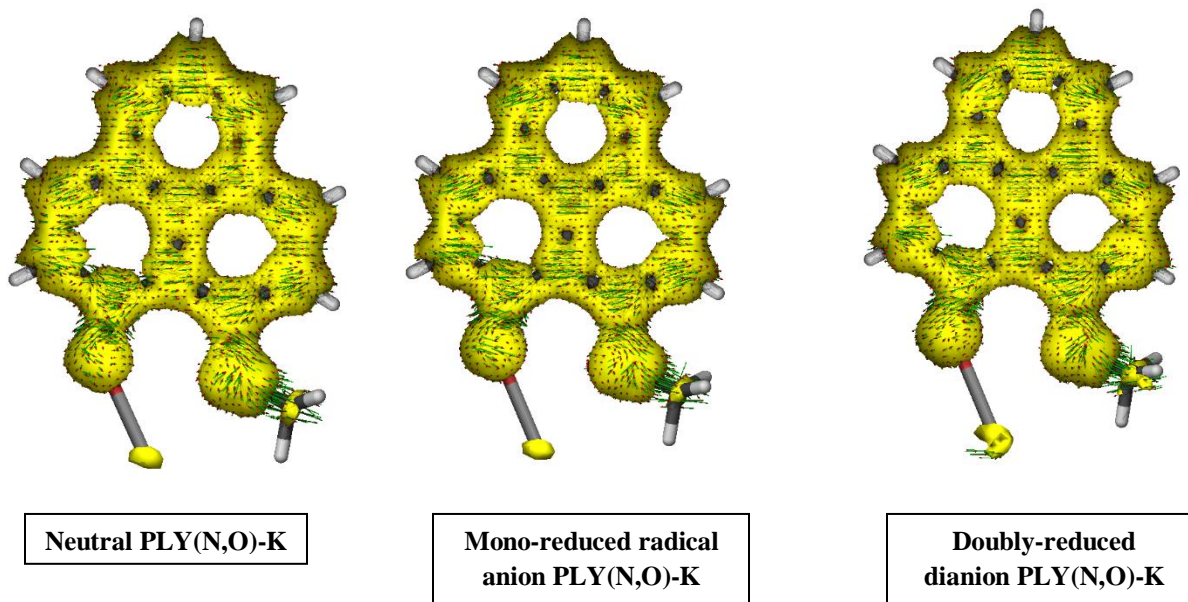

Figure S24: ACID plot of and PLY(N,O)-K complex (**1b**) in three different redox states.

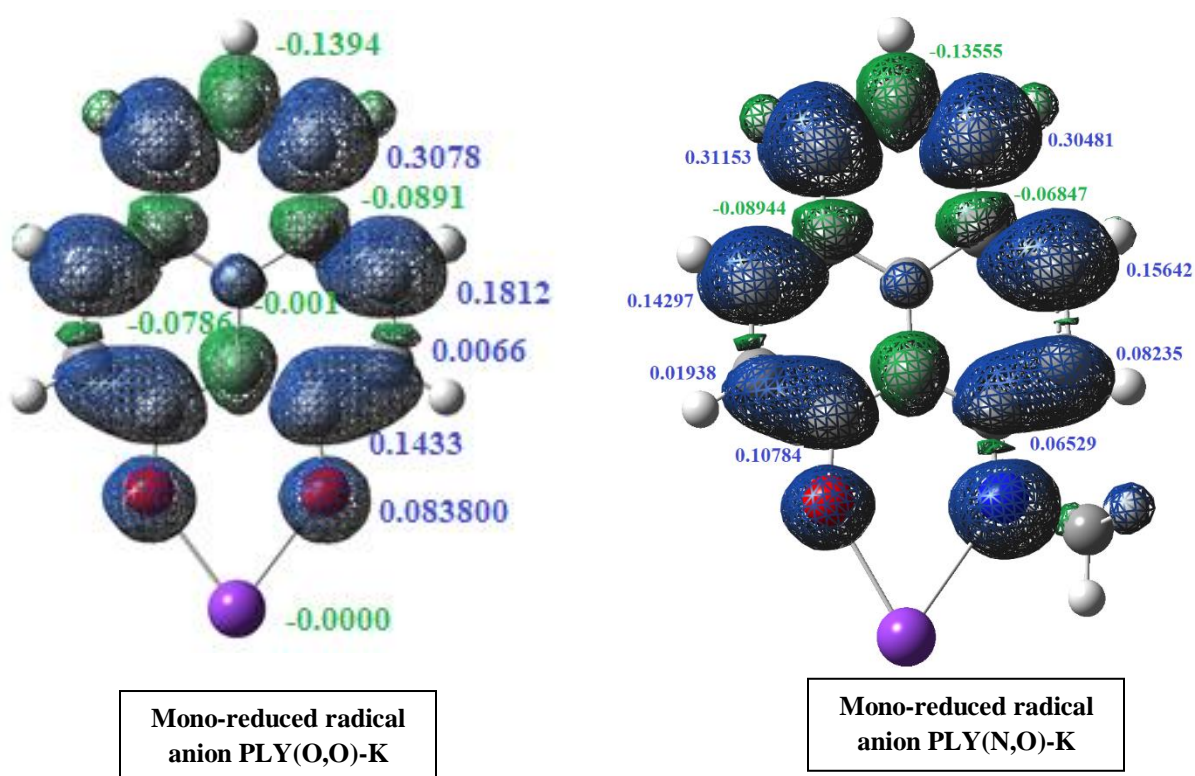

Figure S25. Spin density plots of mono-reduced PLY moieties.

## 9. Model example for Nuclear Independent Chemical Shift (NICS) calculation:

### I. NICS calculation for the top aromatic ring of PLY(O,O)-K (1a):

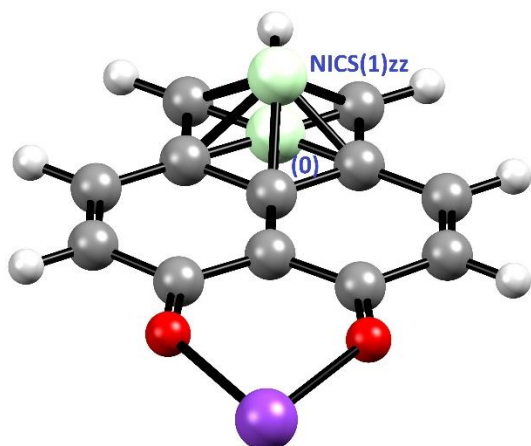

**PLY(O,O)-K neutral:**

NICS(1)zz = 25.0 ppm

**PLY(O,O)-K anion:**

NICS(1)zz = 16.9 ppm

**PLY(O,O)-K dianion:**

NICS(1)zz = 6.6 ppm

### II. NICS calculation for the two equivalent aromatic ring (side rings) of PLY(O,O)-K (1a):

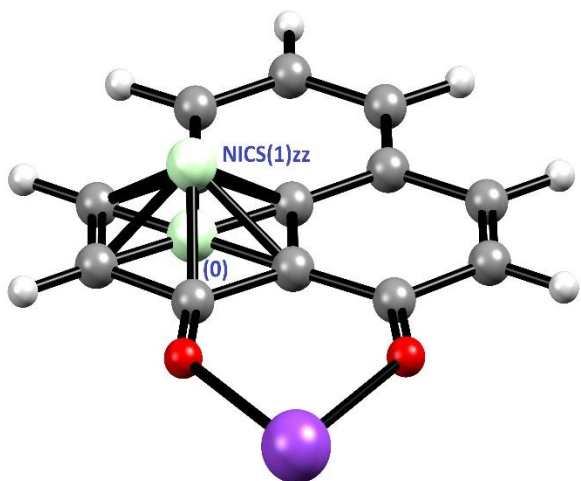

**PLY(O,O)-K neutral:**

NICS(1)zz = 9.6 ppm

**PLY(O,O)-K anion:**

NICS(1)zz = 8.9 ppm

**PLY(O,O)-K dianion:**

NICS(1)zz = 7.4 ppm

## SCF GIAO Magnetic shielding tensor (ppm):

1.

### a) PLY(O,O)-K (top ring):

6. Bq (0) Isotropic = 8.1380 Anisotropy = 0.6068

XX= 8.5419 YX= -0.0215 ZX= -0.0331

XY= 0.0022 YY= 7.9282 ZY= 0.0833

XZ= 0.0013 YZ= 0.0797 ZZ= 7.9440

Eigenvalues: 7.8542 8.0173 8.5425

7. Bq Isotropic = 10.3276 Anisotropy = 22.4018

XX= 24.9996 YX= 3.5564 ZX= 1.9117

XY= 0.6070 YY= 3.1251 ZY= 0.2707

XZ= 0.4828 YZ= 0.2647 ZZ= 2.8581

Eigenvalues: 2.6920 3.0287 25.2621

### b) PLY(O,O)-K (side rings).

6 Bq Isotropic = 2.1849 Anisotropy = 12.8656

XX= -8.0601 YX= -0.1569 ZX= -0.0102

XY= -0.1674 YY= 10.7372 ZY= -0.8200

XZ= 0.0030 YZ= 0.0181 ZZ= 3.8776

Eigenvalues: -8.0615 3.8543 10.7620

7 Bq Isotropic = 5.3896 Anisotropy = 9.4100

XX= 9.5909 YX= 4.3790 ZX= 4.6344

XY= 1.0645 YY= 4.6776 ZY= -0.2043

XZ= 1.6222 YZ= 0.2760 ZZ= 1.9002

Eigenvalues: 0.5656 3.9402 11.6629

**2.a) Mono-reduced PLY(O,O)-K (top ring)**

6 Bq Isotropic = 5.1816 Anisotropy = 5.2957

XX= -1.1644 YX= -0.1149 ZX= -0.0231

XY= -0.3037 YY= 8.1521 ZY= -0.2903

XZ= 0.4094 YZ= -0.2811 ZZ= 8.5571

Eigenvalues: -1.1727 8.0054 8.7121

7 Bq Isotropic = 7.5944 Anisotropy = 14.4618

XX= 16.9327 YX= 2.8929 ZX= 1.8749

XY= 0.2226 YY= 2.9397 ZY= 0.0492

XZ= 0.8646 YZ= 0.1579 ZZ= 2.9108

Eigenvalues: 2.7268 2.8207 17.2356

**b) Mono-reduced PLY(O,O)-K (side rings):**

6 Bq Isotropic = 2.2606 Anisotropy = 12.9684

XX= -8.7395 YX= 0.2155 ZX= 0.4257

XY= 0.0326 YY= 10.8219 ZY= -0.9934

XZ= 0.1245 YZ= -0.4488 ZZ= 4.6993

Eigenvalues: -8.7461 4.6217 10.9062

7 Bq Isotropic = 5.2616 Anisotropy = 8.1911

XX= 8.8841 YX= 3.6864 ZX= 3.7492

XY= 1.0212 YY= 4.3829 ZY= -0.1436

XZ= 1.7475 YZ= 0.4858 ZZ= 2.5177

Eigenvalues: 1.3187 3.7437 10.7223

### 3.

#### a) Doubly-reduced PLY(O,O)-K (top ring):

6 Bq Isotropic = 1.0290 Anisotropy = 12.5250

XX= -13.5032 YX= -0.3105 ZX= 0.1891

XY= -0.8729 YY= 7.7619 ZY= -0.9362

XZ= 1.2629 YZ= -0.8651 ZZ= 8.8282

Eigenvalues: -13.5416 7.2495 9.3790

7 Bq Isotropic = 3.8663 Anisotropy = 5.4113

XX= 6.5940 YX= 2.2258 ZX= 1.9996

XY= -0.1141 YY= 2.3540 ZY= -0.3106

XZ= 1.6413 YZ= -0.0240 ZZ= 2.6508

Eigenvalues: 1.5162 2.6088 7.4738

#### b) Doubly-reduced PLY(O,O)-K (side rings):

6 Bq(0) Isotropic = 2.1511 Anisotropy = 12.8986

XX= -9.7551 YX= 0.7836 ZX= 1.2722

XY= 0.2615 YY= 10.6000 ZY= -1.0092

XZ= 0.2191 YZ= -0.7020 ZZ= 5.6084

Eigenvalues: -9.8068 5.5099 10.7502



7 Bq(1) Isotropic = 4.8140 Anisotropy = 6.9933

XX= 7.3866 YX= 2.8677 ZX= 2.8169

XY= 0.9055 YY= 3.6386 ZY= 0.1098

XZ= 2.3355 YZ= 2.1437 ZZ= 3.4168

Eigenvalues: 2.1096 2.8562 9.4762

## 10. Theoretical calculations for all reduction processes:

The theoretical calculation for the different redox process have been carried out by DFT with B3LYP of calculation using 6-31g(d) basis set.

a. Gibbs free energy change for the mono-reduced PLY(O,O)-K complex preparation from neutral PLY(O,O)-K complex.

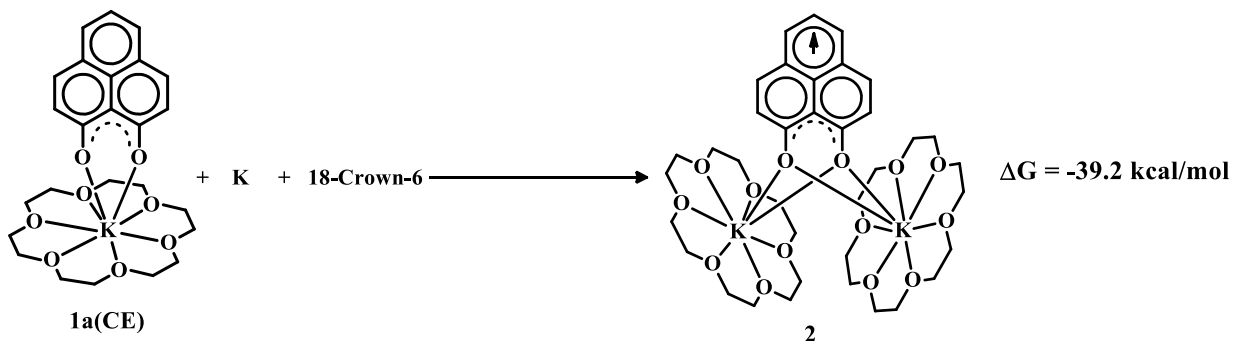

b. Gibbs free energy change for the doubly-reduced PLY(O,O)-K complex preparation from mono-reduced PLY(O,O)-K complex.

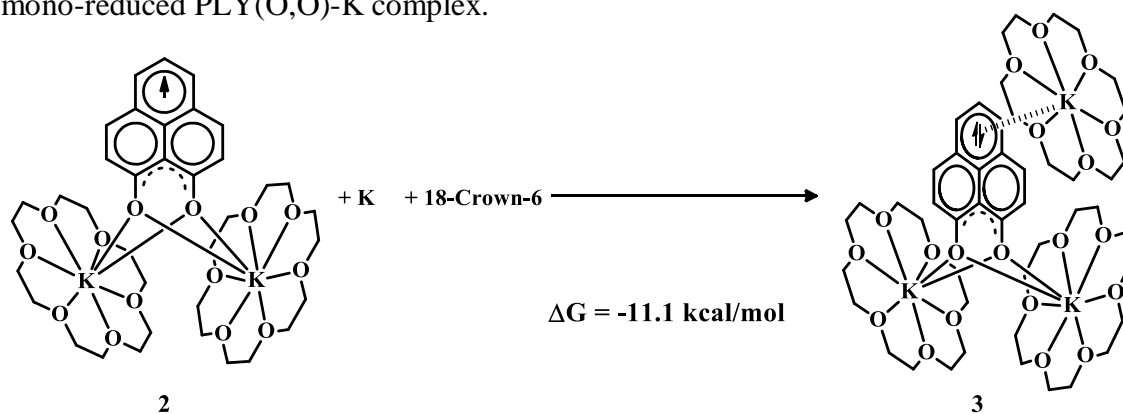

**Scheme S1:** Gibbs free energy change for different reduction processes. a) For mono reduction; b) for double reduction of PLY(O,O)-K(18-crown-6) complex.

11. Optimized geometries of three different redox states of PLY(O,O)-K complex:

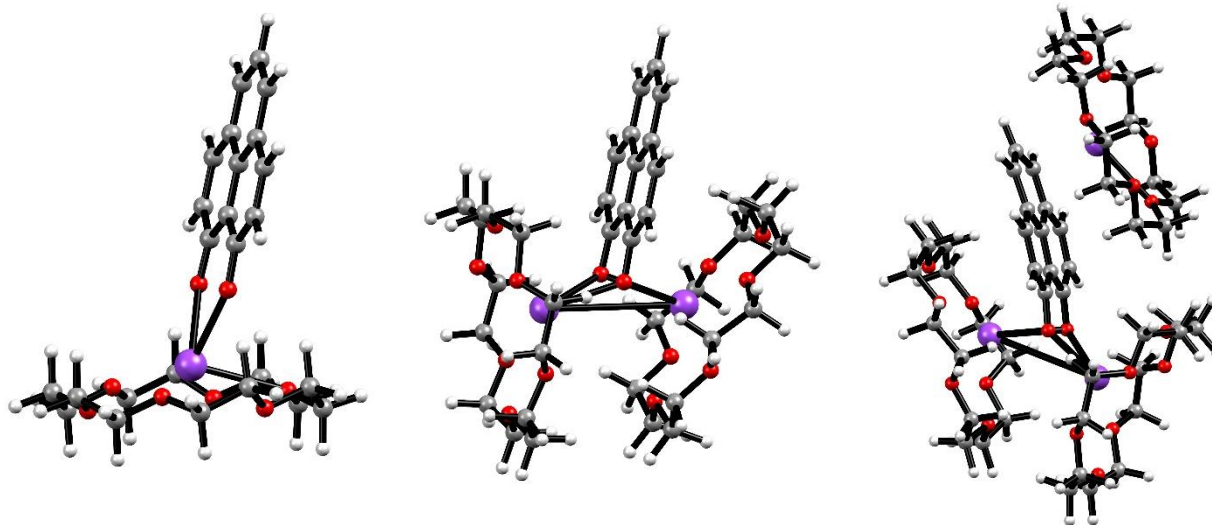

[PLY-K(18-Crown-6)](1a(CE))    [PLY-K(18-Crown-6)<sub>2</sub>](2)    [PLY-K(18-Crown-6)<sub>3</sub>](3)

**Table S1:** Energies, enthalpies, and free energies (in Hartree) of the structures calculated with B3LYP/6-31G(d).

| Structure      | ZPE     | $\Delta E$ | $\Delta H$ | $\Delta G$ | E               | H               | G               | IF(cm <sup>-1</sup> ) | Infrared |
|----------------|---------|------------|------------|------------|-----------------|-----------------|-----------------|-----------------------|----------|
| <b>PLY-Kc</b>  | 0.53557 | 0.56889    | 0.56984    | 0.46855    | -<br>2172.52029 | -<br>2172.51934 | -<br>2172.62063 |                       |          |
| <b>K</b>       | 0.00000 | 0.00141    | 0.00236    | -0.0158    | -599.88896      | -599.88801      | -599.90620      |                       |          |
| <b>Crown</b>   | 0.37011 | 0.38972    | 0.39066    | 0.32065    | -922.58725      | -922.58631      | -922.65632      |                       |          |
| <b>PLY-2Kc</b> | 0.90639 | 0.96278    | 0.96372    | 0.81065    | -<br>3695.09349 | -<br>3695.09254 | -<br>3695.24562 |                       |          |
| <b>PLY-3Kc</b> | 1.27698 | 1.35680    | 1.35775    | 1.15323    | -<br>5217.62234 | -<br>5217.62140 | -<br>5217.82592 |                       |          |

## 12. DFT calculation for the quenching experiment by HCl treatment of doubly-reduced

PLY(O,O)-K complex (3):

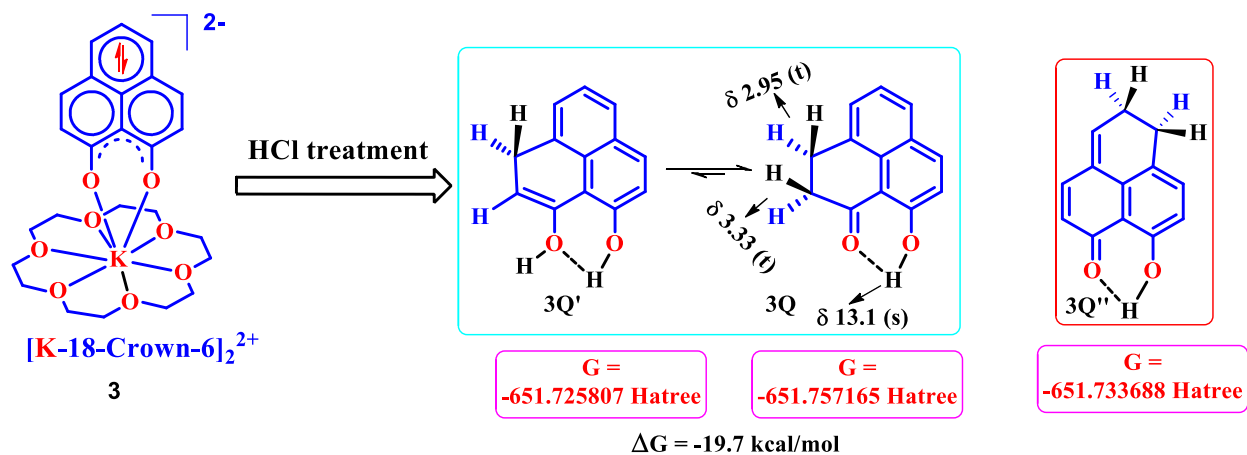

Optimized Structures:

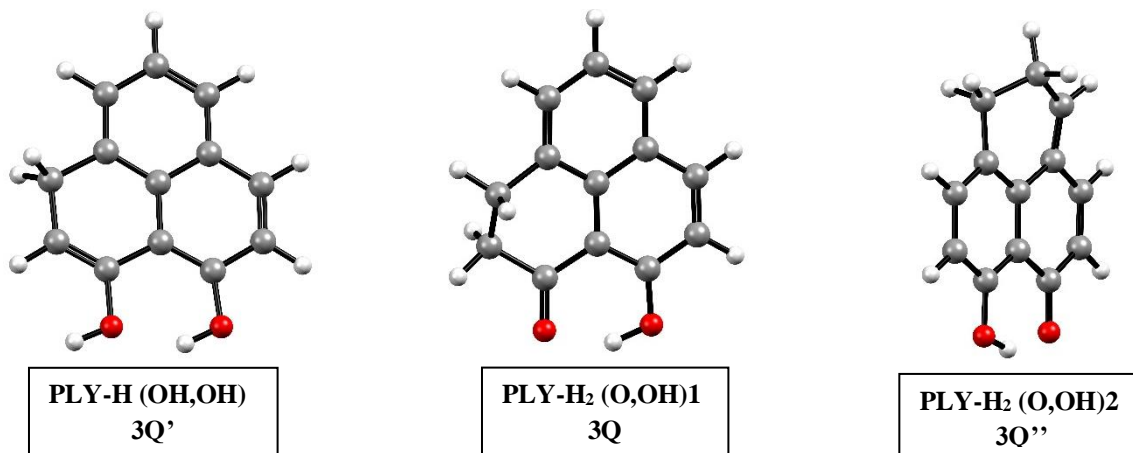

**Table S2:** Energies, enthalpies, and free energies (in Hartree) of the structures calculated with B3LYP/6-31G(d).

| Structure            | ZPE     | $\Delta E$ | $\Delta H$ | $\Delta G$ | E          | H          | G          | IF(cm <sup>-1</sup> ) <sup>1)</sup> | Infrared |
|----------------------|---------|------------|------------|------------|------------|------------|------------|-------------------------------------|----------|
| PLY-H                | 0.19658 | 0.20781    | 0.20876    | 0.15966    | -651.67765 | -651.67670 | -651.72580 |                                     |          |
| PLY-H <sub>2</sub> 1 | 0.19792 | 0.20850    | 0.20944    | 0.16188    | -651.71054 | -651.70959 | -651.75716 |                                     |          |
| PLY-H <sub>2</sub> 2 | 0.19721 | 0.20796    | 0.20891    | 0.16101    | -651.68673 | -651.68578 | -651.73368 |                                     |          |

**13. Frontier molecular orbital diagrams of three different redox states of K-phenalenyl complex:**

a) Neutral PLY(O,O)-K complex (**1a**).

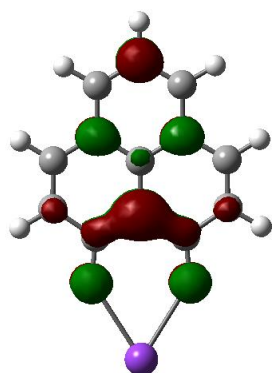

HOMO (-5.48 eV)

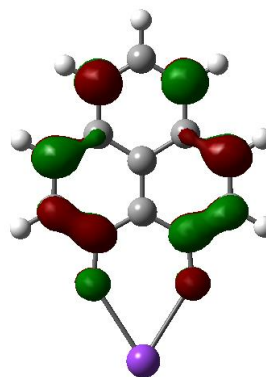

LUMO (-2.07 eV)

b) Mono-reduced PLY(O,O)-K complex (**II**).

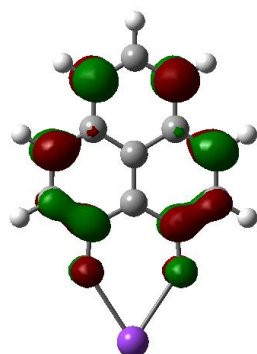

SOMO (-2.64 eV)

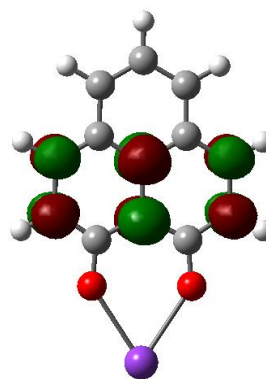

LUMO (-0.25 eV)

c) Doubly-reduced PLY(O,O)-K complex (**III**):

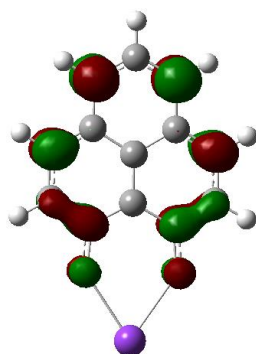

HOMO (-1.75 eV)

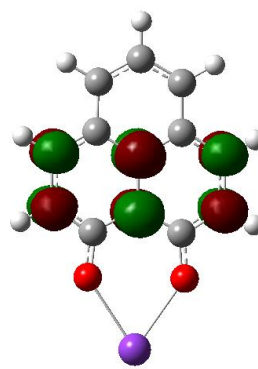

LUMO (-0.18 eV)

**Figure S26.** Frontier molecular orbital diagrams and energies of three different redox states of PLY(O,O)-K complex (**1a**).

a) Neutral PLY(N,O)-K complex(**1b**).

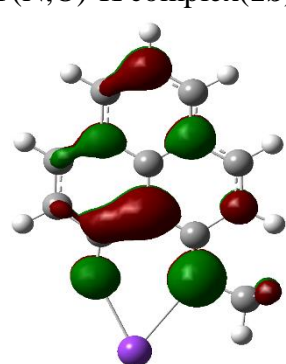

HOMO (-4.96 eV)

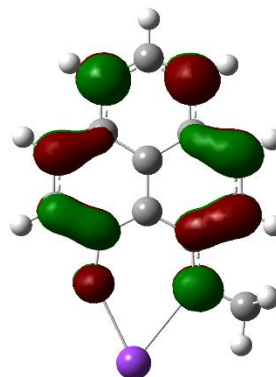

LUMO (-1.87 eV)

b) Mono-reduced PLY(N,O)-K complex.

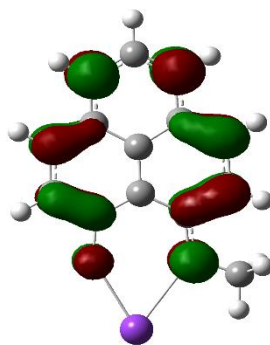

SOMO (-2.45 eV)

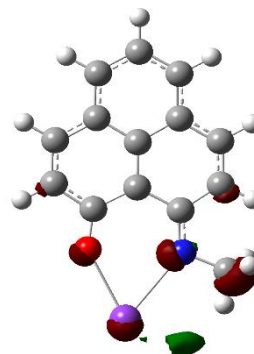

LUMO (-0.27 eV)

c) Doubly-reduced PLY(N,O)-K complex:

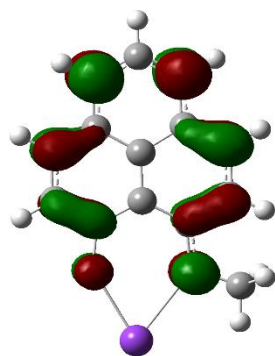

HOMO (-1.68 eV)

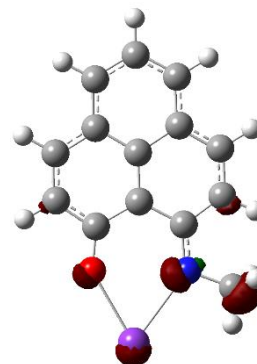

LUMO (-0.20 eV)

**Figure S27.** Frontier molecular orbital diagrams and energies of three different redox states of PLY(N,O)-K complex (**1b**).

#### **14. Crystallographic and data collection parameters for 1a(CE), 1b(CE), 2:**

##### **X-ray crystallographic details:**

Suitable single crystals of **1a(CE)**, **1b(CE)** and **2** were selected and mounted under nitrogen atmosphere using the X-TEMP2 and intensity data were collected on a Super Nova, Dual, Cu at zero, Eos diffractometer. Both the crystals were kept at 100 K during data collection. Using Olex2<sup>10</sup>, the structure was solved with the ShelX<sup>11</sup> structure solution program using Intrinsic Phasing and refined with the ShelXL<sup>11</sup> refinement package using Least Squares minimisation. All nonhydrogen atoms were refined with anisotropic displacement parameters. Crystallographic data (including structure factors) for the structures have been deposited with the Cambridge Crystallographic Data Centre. Copies of the data can be obtained free of charge from The Cambridge Crystallographic Data Centre *via* [www.ccdc.cam.ac.uk/data\\_request/cif](http://www.ccdc.cam.ac.uk/data_request/cif). CCDC 1991245, 2015680 and 1991246 contains the supplementary crystallographic data of compounds **1a(CE)**, **1b(CE)** and **2** respectively for this paper.

**Table S3: Crystal data and structure refinement for PLY(O,O)-K[18-crown-6] (1a(CE)).**

|                                      |                                                 |
|--------------------------------------|-------------------------------------------------|
| CCDC                                 | 1991245                                         |
| Empirical formula                    | C <sub>25</sub> H <sub>31</sub> KO <sub>8</sub> |
| Formula weight                       | 498.60                                          |
| Temperature/K                        | 100.00(10)                                      |
| Crystal system                       | Monoclinic                                      |
| Space group                          | P2 <sub>1</sub> /c                              |
| a/Å                                  | 8.3399(4)                                       |
| b/Å                                  | 27.1397(12)                                     |
| c/Å                                  | 11.0226(5)                                      |
| α/°                                  | 90                                              |
| β/°                                  | 100.071(4)                                      |
| γ/°                                  | 90                                              |
| Volume/Å <sup>3</sup>                | 2456.4(2)                                       |
| Z                                    | 4                                               |
| ρ <sub>calc</sub> /g/cm <sup>3</sup> | 1.348                                           |
| μ/mm <sup>-1</sup>                   | 2.296                                           |
| F(000)                               | 1056.0                                          |
| Crystal size/mm <sup>3</sup>         | 0.3 × 0.15 × 0.1                                |
| Radiation                            | CuKα (λ = 1.54184)                              |
| 2θ range for data collection/°       | 6.514 to 132.732                                |



|                                                |                                                               |
|------------------------------------------------|---------------------------------------------------------------|
| Index ranges                                   | $-8 \leq h \leq 9, -32 \leq k \leq 31, -12 \leq l \leq 13$    |
| Reflections collected                          | 16231                                                         |
| Independent reflections                        | 4218 [ $R_{\text{int}} = 0.0429, R_{\text{sigma}} = 0.0345$ ] |
| Data/restraints/parameters                     | 4218/2/295                                                    |
| Goodness-of-fit on $F^2$                       | 1.045                                                         |
| Final R indexes [ $I \geq 2\sigma(I)$ ]        | $R_1 = 0.1134, wR_2 = 0.3001$                                 |
| Final R indexes [all data]                     | $R_1 = 0.1199, wR_2 = 0.3068$                                 |
| Largest diff. peak/hole / $e \text{ \AA}^{-3}$ | 1.52/-0.78                                                    |

**Table S4: Crystal data and structure refinement for PLY(N,O)-K[18-crown-6] (1b(CE)).**

|                                               |                                            |
|-----------------------------------------------|--------------------------------------------|
| Identification code                           | JASI_NOPLY                                 |
| Empirical formula                             | $C_{66}H_{81}K_2N_2O_{14}$                 |
| Formula weight                                | 1204.52                                    |
| Temperature/K                                 | 100.00(10)                                 |
| Crystal system                                | Monoclinic                                 |
| Space group                                   | $P2_1/c$                                   |
| $a/\text{\AA}$                                | 14.2195(10)                                |
| $b/\text{\AA}$                                | 34.5380(19)                                |
| $c/\text{\AA}$                                | 13.8905(9)                                 |
| $\alpha/^\circ$                               | 90                                         |
| $\beta/^\circ$                                | 113.176(8)                                 |
| $\gamma/^\circ$                               | 90                                         |
| Volume/ $\text{\AA}^3$                        | 6271.3(8)                                  |
| Z                                             | 4                                          |
| $\rho_{\text{calc}}/\text{g/cm}^3$            | 1.276                                      |
| $\mu/\text{mm}^{-1}$                          | 1.874                                      |
| F(000)                                        | 2564.0                                     |
| Crystal size/ $\text{mm}^3$                   | $0.25 \times 0.2 \times 0.15$              |
| Radiation                                     | $\text{CuK}\alpha$ ( $\lambda = 1.54184$ ) |
| $2\Theta$ range for data collection/ $^\circ$ | 6.762 to 133.364                           |

|                                                |                                                                |
|------------------------------------------------|----------------------------------------------------------------|
| Index ranges                                   | $-16 \leq h \leq 16, -41 \leq k \leq 39, -16 \leq l \leq 15$   |
| Reflections collected                          | 39527                                                          |
| Independent reflections                        | 10947 [ $R_{\text{int}} = 0.0885, R_{\text{sigma}} = 0.0638$ ] |
| Data/restraints/parameters                     | 10947/0/712                                                    |
| Goodness-of-fit on $F^2$                       | 1.053                                                          |
| Final R indexes [ $I \geq 2\sigma(I)$ ]        | $R_1 = 0.1198, wR_2 = 0.3097$                                  |
| Final R indexes [all data]                     | $R_1 = 0.1510, wR_2 = 0.3471$                                  |
| Largest diff. peak/hole / $e \text{ \AA}^{-3}$ | 0.90/-0.75                                                     |
| CCDC number                                    | 2015680                                                        |

**Table S5: Crystal data and structure refinement for PLY(O,O)-K<sub>2</sub>[18-crown-6]<sub>2</sub> (2).**

|                                        |                                                                |
|----------------------------------------|----------------------------------------------------------------|
| CCDC                                   | 1991246                                                        |
| Empirical formula                      | C <sub>51</sub> H <sub>69</sub> K <sub>2</sub> O <sub>14</sub> |
| Formula weight                         | 984.26                                                         |
| Temperature/K                          | 100.00(10)                                                     |
| Crystal system                         | Orthorhombic                                                   |
| Space group                            | P2 <sub>1</sub> 2 <sub>1</sub> 2 <sub>1</sub>                  |
| a/Å                                    | 14.23700(10)                                                   |
| b/Å                                    | 18.7126(2)                                                     |
| c/Å                                    | 19.1013(2)                                                     |
| $\alpha$ /°                            | 90                                                             |
| $\beta$ /°                             | 90                                                             |
| $\gamma$ /°                            | 90                                                             |
| Volume/Å <sup>3</sup>                  | 5088.80(8)                                                     |
| Z                                      | 4                                                              |
| $\rho_{\text{calc}}$ /cm <sup>3</sup>  | 1.285                                                          |
| $\mu$ /mm <sup>-1</sup>                | 2.176                                                          |
| F(000)                                 | 2100.0                                                         |
| Crystal size/mm <sup>3</sup>           | 0.25 × 0.15 × 0.1                                              |
| Radiation                              | CuK $\alpha$ ( $\lambda$ = 1.54184)                            |
| 2 $\Theta$ range for data collection/° | 6.612 to 132.292                                               |
| Index ranges                           | -16 ≤ h ≤ 16, -22 ≤ k ≤ 22, -18 ≤ l ≤ 22                       |

|                                                |                                                                  |
|------------------------------------------------|------------------------------------------------------------------|
| Reflections collected                          | 34892                                                            |
| Independent reflections                        | 8827 [ $R_{\text{int}} = 0.0273$ , $R_{\text{sigma}} = 0.0212$ ] |
| Data/restraints/parameters                     | 8827/0/606                                                       |
| Goodness-of-fit on $F^2$                       | 1.028                                                            |
| Final R indexes [ $I \geq 2\sigma(I)$ ]        | $R_1 = 0.0407$ , $wR_2 = 0.1069$                                 |
| Final R indexes [all data]                     | $R_1 = 0.0415$ , $wR_2 = 0.1077$                                 |
| Largest diff. peak/hole / $e \text{ \AA}^{-3}$ | 0.55/-0.43                                                       |
| Flack parameter                                | 0.450(2)                                                         |

## 15. Reaction Optimization for direct C-H arylation of N-methyl pyrrole with 4-chlorobenzonitrile coupling partner:

Catalyst PLY(O,O)-K (0.024 mmol) and reducing agent (0.06 mmol) were taken in 1.2 mL solvent in a 25 mL pressure tube. This mixture was allowed to stir at room temperature for 30 mins. N-methylpyrrole (1.2 mmol), 4-chlorobenzonitril (0.24 mmol) and base (0.48 mmol) were added to the resulting solution of catalyst inside a nitrogen filled glovebox. The final reaction mixture was allowed to stir for appropriate time at room temperature. After completion of the reaction, product was extracted in 25 mL ethylacetate and dried over anhydrous sodium sulphate. The solvent was removed under reduced pressure to get the crude product. Reaction conversion was calculated by  $^1\text{H}$  NMR spectrum of the crude reaction mixture using 1,4-dimethoxybenzene as the internal standard.

**Table S6: Reaction optimization table.**

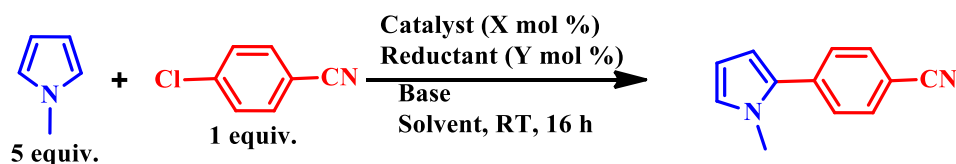

| Entry | Catalyst (mol %)       | Reductant<br>(mol%) | Base (equiv.)               | Solvent    | Yield                       |
|-------|------------------------|---------------------|-----------------------------|------------|-----------------------------|
| 1     | PLY(O,O)-K (5)         | K (15)              | KO <sup>t</sup> Bu (2)      | DMSO       | 12%                         |
| 2     | PLY(O,O)-K (10)        | K (25)              | KO <sup>t</sup> Bu (2)      | DMSO       | 15%                         |
| 3     | <b>PLY(O,O)-K (10)</b> | <b>K (25)</b>       | <b>KO<sup>t</sup>Bu (2)</b> | <b>DMF</b> | <b>54%(51%<sup>a</sup>)</b> |

|                 |                                   |               |           |      |       |
|-----------------|-----------------------------------|---------------|-----------|------|-------|
| 4               | PLY(O,O)-K (10)                   | K (25)        | KO'Bu (2) | DMAc | 40%   |
| 5               | PLY(O,O)-K (10)                   | -             | KO'Bu (2) | DMF  | 10%   |
| 6               | -                                 | K (25)        | KO'Bu (2) | DMF  | 23%   |
| 7               | Fe(PLY(O,O)) <sub>3</sub><br>(10) | K (30)        | KO'Bu (2) | DMF  | <10%  |
| 8               | PLY(O,O)-K (10)                   | K (15)        | KO'Bu (2) | DMAc | 25%   |
| 9               | PLY-O,O-K (10)                    | K (25)        | KO'Bu (2) | THF  | 0 %   |
| 10              | PLY(O,O) cat<br>(10)              | K (25)        | KO'Bu (2) | DMF  | <10 % |
| 11 <sup>b</sup> | PLY(O,O)-K (10)                   | K (25)        | KO'Bu (2) | DMF  | 52 %  |
| 12 <sup>c</sup> | PLY(O,O)-K (10)                   | K (25)        | KO'Bu (2) | DMF  | <2%   |
| 13              | PLY(N,O)-K (10)                   | K (25)        | KOtBu (2) | DMF  | 67%   |
| 14              | -                                 | K (1.5 equiv) | KO'Bu (2) | DMF  | 30%   |

<sup>a</sup> Isolated yield; <sup>b</sup> Reaction was carried out under dark condition; <sup>c</sup>The reaction was performed with chlorobenzene coupling partner.

#### 16. C-H arylation of arenes/heteroarenes with 4-chlorobenzonitrile in absence of catalyst.

Potassium (0.06 mmol), N-methylpyrrole (1.2 mmol), 4-chlorobenzonitril (0.24 mmol) and KO'Bu (0.48 mmol) were taken in 1.2 mL n,n-dimethylformamide in a 25 mL pressure tube inside an argon filled glovebox. The final reaction mixture was allowed to stir for appropriate 5time at room

temperature. After completion of the reaction, product was extracted in 25 mL ethylacetate and dried over anhydrous sodium sulphate. The solvent was removed under reduced pressure to get the crude product. Reaction conversion was calculated by  $^1\text{H}$  NMR spectrum of the crude reaction mixture using 1,4-dimethoxybenzene as the internal standard.

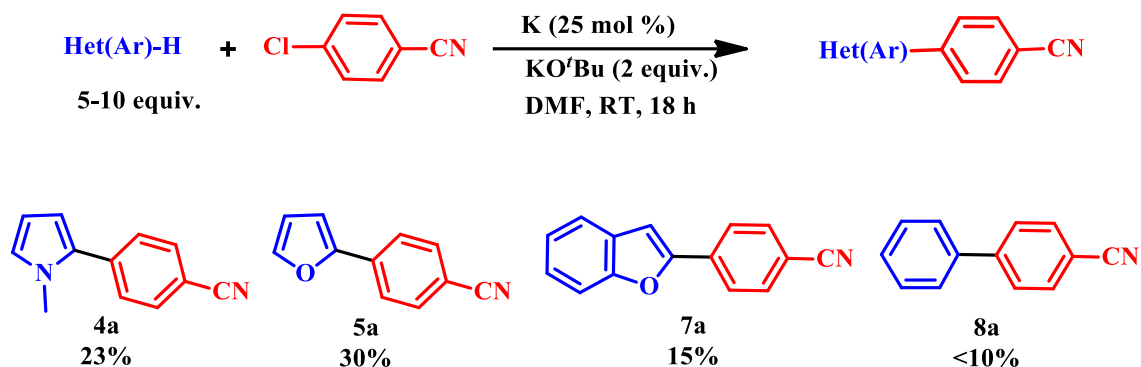

### 17. General procedure for C-H arylation of arenes/heteroarenes with aryl halides:

PLY(O,O)-K (0.024 mmol) and K (0.06 mmol) were taken in 1.2 mL DMF/DMSO solvent in a 25 mL pressure tube. This mixture was allowed to stir at room temperature for 30 mins. Arene/heteroarenes, aryl halide partner (0.24 mmol) and KO<sup>t</sup>Bu (0.48 mmol) were added to the resulting solution of catalyst inside a nitrogen filled glovebox. After the final reaction mixture was allowed to stir for appropriate time at room temperature. After completion of the reaction, product was extracted in 25 mL ethylacetate and dried over anhydrous sodium sulphate. The solvent was removed under reduced pressure and crude product was purified by column chromatography over silica gel (100-200 mesh) using hexane/EtOAc mixture to yield the pure desired products.



## 18. General procedure for intramolecular coupling reactions:

In a typical method, PLY(O,O)-K (**1a**, 0.024 mmol) and K (0.06 mmol) were taken in 1.2 mL DMF in a 25 mL pressure tube. This mixture was allowed to stir at room temperature for 30 mins. Substrates (5as-5es, 0.24 mmol) and KO<sup>t</sup>Bu (0.48 mmol) were added to the resulting solution of catalyst inside an argon filled glovebox. The final reaction mixture was allowed to stir for appropriate time at room temperature. After completion of the reaction, products were extracted in 25 mL ethylacetate and dried over anhydrous sodium sulphate. The solvent was removed under reduced pressure to get the crude products. NMR (<sup>1</sup>H and <sup>13</sup>C) spectroscopic measurements of all the reaction mixtures were carried out to characterize the products and the conversion were calculated from <sup>1</sup>H NMR peak intensities.

## 19. Radical scavenging experiment in presence of TEMPO:

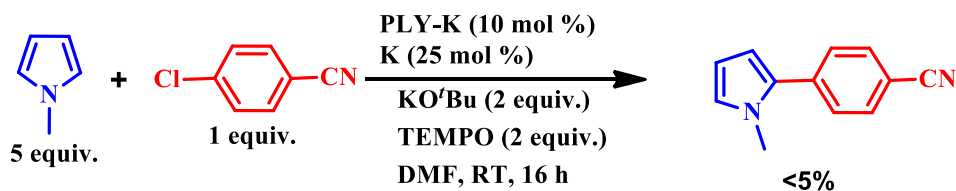

PLY(O,O)-K (**1a**, 0.024 mmol) and K (0.06 mmol) were taken in 1.2 mL DMF in a 25 mL pressure tube. This mixture was allowed to stir at room temperature for 30 mins. N-methylpyrrole (1.2 mmol), 4-chlorobenzonitril (0.24 mmol) and KO<sup>t</sup>Bu (0.48 mmol) were added to the resulting solution of catalyst inside a nitrogen filled glovebox. TEMPO (0.48 mmol) was added in the resulting reaction mixture. The final reaction mixture was allowed to stir for appropriate time at room temperature. After completion of the reaction, product was extracted in 25 mL ethylacetate and dried over anhydrous sodium sulphate. The solvent was removed under reduced pressure and crude product was subjected for <sup>1</sup>H NMR spectroscopic measurement.

## 20. Radical trapping experiment:

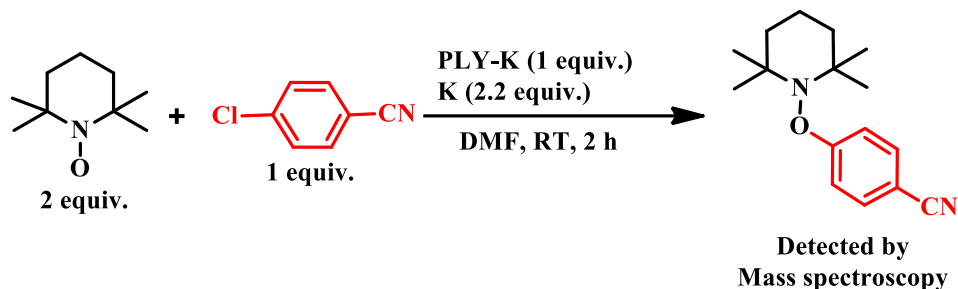

PLY(O,O)-K (**1a**, 0.24 mmol) and K (0.53 mmol) were taken in 1.2 mL DMF in a 25 mL pressure tube. This mixture was allowed to stir at room temperature for 30 min, 4-chlorobenzonitril (0.24 mmol) was added to the resulting solution of catalyst inside an argon filled glovebox. TEMPO (0.48 mmol) was added in the resulting reaction mixture. The final reaction mixture was allowed to stir for 2h at room temperature. After completion of the reaction, product was extracted in 25 mL ethylacetate and dried over anhydrous sodium sulphate. The mass spectroscopic measurement of this crude reaction mixture was carried out in acetonitrile solvent (Figure 98).

## 21. Catalyst recovery after catalytic reaction:

PLY(O,O)-K (0.107 mmol) and K (0.23 mmol) were taken in 2 mL DMF/DMSO solvent in a 25 mL pressure tube. This mixture was allowed to stir at room temperature for 30 mins. N-methylpyrrole (5.3 mmol), 4-chlorobenzonitril (1.07 mmol) and KO<sup>t</sup>Bu (0.214 mmol) were added to the resulting solution of catalyst inside a nitrogen filled glovebox. After the final reaction mixture was allowed to stir for appropriate time at room temperature. After completion of the reaction, product was extracted in 25 mL ethylacetate and dried over anhydrous sodium sulphate. The solvent was removed under reduced pressure. The phenalenyl parts were collected together from column chromatography with 10% ethylacetate in hexane mixture. The <sup>1</sup>H NMR spectrum

of this residues (Figure S96) shows the presence of PLY(O,OH) along with other species. We could isolate 6 mg of PLY(O,OH) from this mixture which indicates ~30% recovery of the catalyst.

## 21. The analytical and spectral characterization data of the catalytic products

### 4-(1-methylpyrrole)benzonitrile (4a):<sup>12</sup>

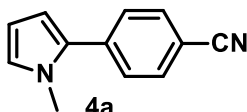

The crude product was purified by column chromatography using silica gel (100-200 mesh) with 5% ethylacetate in hexane. The compound was obtained as a white solid.

**<sup>1</sup>H NMR** (400 MHz, CDCl<sub>3</sub>, 298K)  $\delta$  (ppm) 3.72 (s, 3H), 6.23 (dd, 1H,  $J_1 = 4$  Hz,  $J_2 = 2$  Hz), 6.34 (m, 1H), 6.78 (t, 1H,  $J = 4$  Hz), 7.50 (d, 2H,  $J = 8$  Hz), 7.67 (d, 2H,  $J = 8$  Hz).

**<sup>13</sup>C{<sup>1</sup>H} NMR** (100 MHz, CDCl<sub>3</sub>, 298K)  $\delta$ (ppm) 35.4, 108.5, 109.6, 110.7, 118.9, 125.8, 128.2, 132.2, 132.6, 137.6.

### 2-(4-Cyanophenyl)furan (5a):<sup>13</sup>

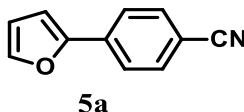

The crude product was purified by column chromatography using silica gel (100-200 mesh) with hexane. The compound was obtained as a white solid.

**<sup>1</sup>H NMR** (400 MHz, CDCl<sub>3</sub>, 298K)  $\delta$  (ppm) 6.52-6.54 (m, 1H), 6.81 (d, 1H,  $J = 2$  Hz), 7.53 (s, 1H), 7.65 (d, 2H,  $J = 8$  Hz), 7.74 (d, 2H,  $J = 8$  Hz).

**<sup>13</sup>C{<sup>1</sup>H} NMR** (100 MHz, CDCl<sub>3</sub>, 298K)  $\delta$ (ppm) 108.1, 110.2, 112.2, 118.9, 123.9, 132.5, 134.6, 143.6, 151.9.

**2-(4-Cyanophenyl)thiophene (6a):**<sup>13</sup>

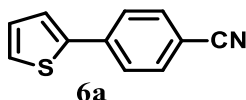

The crude product was purified by column chromatography using silica gel (100-200 mesh) with 2% ethylacetate in hexane. The compound was obtained as a white solid.

**<sup>1</sup>H NMR** (400 MHz, CDCl<sub>3</sub>, 298K)  $\delta$  (ppm) 7.13 (t, 1H,  $J = 4$  Hz), 7.40-7.43 (m, 2H), 7.64-7.71 (m, 4H).

**<sup>13</sup>C{<sup>1</sup>H} NMR** (100 MHz, CDCl<sub>3</sub>, 298K)  $\delta$ (ppm) 110.6, 118.8, 125.1, 126.1, 127.0, 128.6, 132.7, 138.6, 142.1.

**4-(benzofuran-2-yl)benzonitrile (7a):**<sup>14</sup>

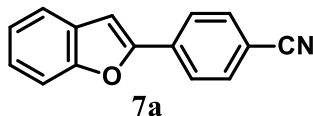

The crude product was purified by column chromatography using silica gel (100-200 mesh) with 5% ethylacetate in hexane. The compound was obtained as a white solid.

**<sup>1</sup>H NMR** (400 MHz, CDCl<sub>3</sub>, 298K)  $\delta$  (ppm) 7.18 (s, 1H), 7.27 (d, 1H,  $J = 8$  Hz), 7.35 (t, 1H,  $J = 8$  Hz), 7.55 (m, 1H), 7.63 (d, 1H,  $J = 8$  Hz), 7.73 (d, 2H,  $J = 9$  Hz), 7.95 (d, 2H,  $J = 8$  Hz).

**<sup>13</sup>C{<sup>1</sup>H} NMR** (100 MHz, CDCl<sub>3</sub>, 298K)  $\delta$ (ppm) 104.5, 111.5, 111.6, 118.7, 121.5, 123.4, 125.1, 125.6, 128.6, 132.6, 134.4, 153.5, 155.2.

**4-Cyanobiphenyl (8a):**<sup>13</sup>

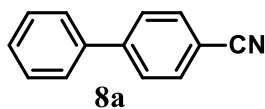

The crude product was purified by column chromatography using silica gel (100-200 mesh) with hexane. The compound was obtained as a white solid.

**<sup>1</sup>H NMR** (400 MHz, CDCl<sub>3</sub>, 298K)  $\delta$  (ppm) 7.41 (d, 1H,  $J = 8$  Hz), 7.47 (t, 2H,  $J = 7$  Hz), 7.59 (d, 2H,  $J = 8$  Hz), 7.70 (q, 4H,  $J = 8.2$  Hz).

**<sup>13</sup>C{<sup>1</sup>H} NMR** (100 MHz, CDCl<sub>3</sub>, 298K)  $\delta$ (ppm) 110.9, 118.9, 127.2, 127.7, 128.6, 129.1, 132.6, 139.2, 145.7.

**1-Cyano-4-(2, 4-dimethylbenzene) (9a):**<sup>15</sup>

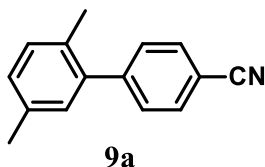

The crude product was purified by column chromatography using silica gel (100-200 mesh) with hexane. The compound was obtained as a white solid.

**<sup>1</sup>H NMR** (400 MHz, DMSO-d<sub>6</sub>, 298K)  $\delta$  (ppm) 2.21 (s, 3H), 2.36 (s, 3H), 7.01 (s, 1H), 7.13 (d, 1H,  $J = 3$  Hz), 7.18 (d, 1H,  $J = 4$  Hz), 7.42 (dd, 2H,  $J_1 = 8$  Hz,  $J_2 = 2$ Hz), 7.69 (dd, 2H,  $J_1 = 8$  Hz,  $J_2 = 2$  Hz).

**<sup>13</sup>C{<sup>1</sup>H} NMR** (100 MHz, DMSO-d<sub>6</sub>, 298K)  $\delta$ (ppm) 19.8, 20.8, 110.6, 118.9, 129.0, 129.9, 130.0, 130.6, 131.9, 135.6, 139.8, 147.0.

**1-Cyano-4-mesitylbenzene (10a):** <sup>13</sup>

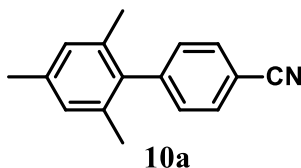

The crude product was purified by column chromatography using silica gel (100-200 mesh) with hexane. The compound was obtained as a white solid.

**<sup>1</sup>H NMR** (400 MHz, CDCl<sub>3</sub>, 298K)  $\delta$  (ppm) 1.98 (s, 6H), 2.34 (s, 3H), 6.96 (s, 2H), 7.27 (d, 2H,  $J = 8$  Hz), 7.70 (d, 2H,  $J = 8$  Hz).

**<sup>13</sup>C{<sup>1</sup>H} NMR** (100 MHz, CDCl<sub>3</sub>, 298K)  $\delta$  (ppm) 20.5, 21.0, 110.6, 118.9, 128.3, 130.3, 132.3, 135.3, 137.1, 138.0, 146.4.

**4-(1-methylpyrrole)anisole (4b):** <sup>16</sup>

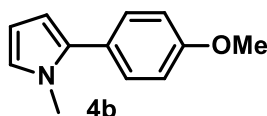

The crude product was purified by column chromatography using silica gel (100-200 mesh) with 10% ethylacetate in hexane. The compound was obtained as a light yellow colored solid.

**<sup>1</sup>H NMR** (400 MHz, CDCl<sub>3</sub>, 298K)  $\delta$  (ppm) 3.64 (s, 3H), 3.85 (s, 3H), 6.16-6.17 (m, 1H), 6.19-6.21 (m, 1H), 6.70 (t, 1H,  $J = 6$  Hz), 6.95 (d, 2H,  $J = 8$  Hz), 7.32 (d, 2H,  $J = 9$  Hz).

**<sup>13</sup>C{<sup>1</sup>H} NMR** (100 MHz, CDCl<sub>3</sub>, 298K)  $\delta$  (ppm) 34.8, 55.3, 107.5, 107.9, 113.7, 123.0, 125.9, 130.0, 134.3, 158.6.

**4-(1-methylpyrrole)benzene (4c):** <sup>16</sup>

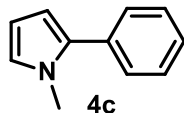

The crude product was purified by column chromatography using silica gel (100-200 mesh) with 10% ethylacetate in hexane. The compound was obtained as a light yellow colored solid.

<sup>1</sup>H NMR (400 MHz, CDCl<sub>3</sub>, 298K)  $\delta$  (ppm) 3.67 (s, 3H), 6.20-6.24 (m, 2H), 6.72 (t, 1H,  $J = 2$  Hz), 7.29-7.32 (m, 1H), 7.40-7.42 (m, 4H).

<sup>13</sup>C{<sup>1</sup>H} NMR (100 MHz, CDCl<sub>3</sub>, 298K)  $\delta$  (ppm) 35.0, 107.7, 107.6, 123.6, 126.7, 128.3, 128.6, 133.3, 134.6.

**4-(1-methylpyrrole)3, 5-dimethylbenzene (4d):** <sup>16</sup>

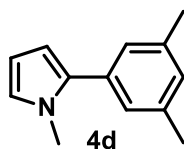

The crude product was purified by column chromatography using silica gel (100-200 mesh) with 10% ethylacetate in hexane. The compound was obtained as a colorless solid.

<sup>1</sup>H NMR (400 MHz, CDCl<sub>3</sub>, 298K)  $\delta$  (ppm) 2.35 (s, 3H), 3.66 (s, 3H), 6.18 (d, 2H,  $J = 4$  Hz), 6.69 (t, 1H,  $J = 2$  Hz), 6.95 (s, 1H), 7.02 (s, 2H).

<sup>13</sup>C{<sup>1</sup>H} NMR (100 MHz, CDCl<sub>3</sub>, 298K)  $\delta$  (ppm) 21.4, 35.0, 107.6, 108.4, 123.3, 126.5, 128.4, 133.2, 134.8, 137.8.

**4-(1-methylpyrrole)biphenyl (4e):**<sup>17</sup>

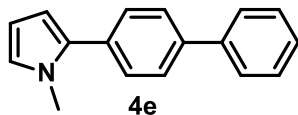

The crude product was purified by column chromatography using silica gel (100-200 mesh) with 10% ethylacetate in hexane. The compound was obtained as a brown colored oil.

**<sup>1</sup>H NMR** (400 MHz, CDCl<sub>3</sub>, 298K)  $\delta$  (ppm) 3.74 (s, 3H), 6.26 (t, 1H,  $J = 2$  Hz), 6.31 (m, 1H), 6.77 (t, 1H,  $J = 1$  Hz), 7.38 (t, 1H,  $J = 2$  Hz), 7.46-7.52 (m, 4H), 7.65 (d, 4H,  $J = 8$  Hz).

**<sup>13</sup>C{<sup>1</sup>H} NMR** (100 MHz, CDCl<sub>3</sub>, 298K)  $\delta$ (ppm) 35.1, 107.8, 108.8, 123.9, 127.0, 127.0, 127.3, 127.5, 127.9, 128.8, 128.8, 128.8, 131.4, 132.3, 134.2, 139.4, 140.6.

**4-(1-methylpyrrole)toluene (4f):**<sup>18</sup>

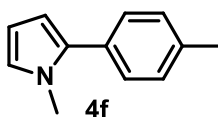

The crude product was purified by column chromatography using silica gel (100-200 mesh) with 10% ethylacetate in hexane. The compound was obtained as a brown colored oil.

**<sup>1</sup>H NMR** (400 MHz, CDCl<sub>3</sub>, 298K)  $\delta$  (ppm) 2.39 (s, 3H), 3.66 (s, 3H), 6.20 (d, 2H,  $J = 2$  Hz), 6.71 (t, 1H,  $J = 2$  Hz), 7.21 (d, 2H,  $J = 8$  Hz), 7.31 (d, 2H,  $J = 8$  Hz).

**<sup>13</sup>C{<sup>1</sup>H} NMR** (100 MHz, CDCl<sub>3</sub>, 298K)  $\delta$ (ppm) 21.1, 34.9, 107.6, 108.2, 123.3, 128.6, 129.0, 130.4, 134.6, 136.5.



**2-(4-Methoxyphenyl)furan (5b):**<sup>14</sup>

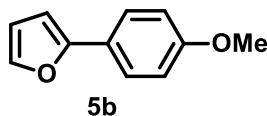

The crude product was purified by column chromatography using silica gel (100-200 mesh) with 2% ethylacetate in hexane. The compound was obtained as a colorless solid.

**<sup>1</sup>H NMR** (400 MHz, CDCl<sub>3</sub>, 298K)  $\delta$  (ppm) 3.82 (s, 3H), 6.43 (t, 1H,  $J = 4$  Hz), 6.49 (d, 1H,  $J = 4$  Hz), 6.91 (d, 2H,  $J = 8$  Hz), 7.41 (s, 1H), 7.59 (d, 2H,  $J = 8$  Hz).

**<sup>13</sup>C{<sup>1</sup>H} NMR** (100 MHz, CDCl<sub>3</sub>, 298K)  $\delta$ (ppm) 55.3, 103.3, 111.5, 114.1, 124.0, 125.2, 141.4, 154.0, 159.0.

**2-Phenylfuran (5c):**<sup>14</sup>

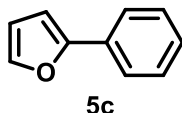

The crude product was purified by column chromatography using silica gel (100-200 mesh) with hexane. The compound was obtained as a colorless solid.

**<sup>1</sup>H NMR** (400 MHz, CDCl<sub>3</sub>, 298K)  $\delta$  (ppm) 6.47 (m, 1H), 6.65 (d, 1H,  $J = 5$  Hz), 7.24-7.28 (m, 1H), 7.38 (t, 2H,  $J = 6$  Hz), 7.68 (d, 2H,  $J = 8$  Hz), 7.47 (s, 1H).

**<sup>13</sup>C{<sup>1</sup>H} NMR** (100 MHz, CDCl<sub>3</sub>, 298K)  $\delta$ (ppm) 105.0, 111.7, 123.9, 127.4, 128.7, 130.9, 142.1, 154.1.

**2-(3, 5-Dimethylphenyl)furan (5d):**<sup>19</sup>

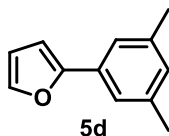

The crude product was purified by column chromatography using silica gel (100-200 mesh) with 2% ethylacetate in hexane. The compound was obtained as a yellow colored oil.

**<sup>1</sup>H NMR** (400 MHz, CDCl<sub>3</sub>, 298K)  $\delta$  (ppm) 2.35 (s, 6H), 6.45 (m, 1H), 6.60 (d, 1H,  $J = 4$  Hz), 6.90 (s, 1H), 7.30 (s, 2H), 7.44 (s, 1H).

**<sup>13</sup>C{<sup>1</sup>H} NMR** (100 MHz, CDCl<sub>3</sub>, 298K)  $\delta$  (ppm) 21.3, 104.7, 111.5, 121.6, 129.1, 130.7, 138.2, 141.8, 154.3.

**2-Biphenylfuran (5e):**<sup>20</sup>

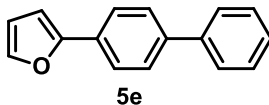

The crude product was purified by column chromatography using silica gel (100-200 mesh) with 2% ethylacetate in hexane. The compound was obtained as a colorless solid.

**<sup>1</sup>H NMR** (400 MHz, CDCl<sub>3</sub>, 298K)  $\delta$  (ppm) 6.5 (q, 1H,  $J_1 = 4$ Hz,  $J_2 = 1$ Hz), 6.7 (d, 1H,  $J = 4$ Hz), 7.45 (t, 2H,  $J = 8$ Hz), 7.50 (d, 1H,  $J = 2$ Hz), 7.63 (d, 4H,  $J = 8$ Hz), 7.75 (d, 2H,  $J = 8$ Hz).

**<sup>13</sup>C{<sup>1</sup>H} NMR** (100 MHz, CDCl<sub>3</sub>, 298K)  $\delta$  (ppm) 105.1, 111.7, 124.2, 126.9, 127.3, 128.8, 129.8, 139.9, 140.6, 142.1, 153.7.

**2-(4-Methylphenyl)furan (5f):**<sup>14</sup>

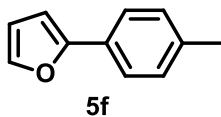

The crude product was purified by column chromatography using silica gel (100-200 mesh) with 5% ethylacetate in hexane. The compound was obtained as a colorless solid.

**<sup>1</sup>H NMR** (400 MHz, CDCl<sub>3</sub>, 298K)  $\delta$  (ppm) 2.35 (s, 3H), 6.44 (m, 1H), 6.57 (d, 1H,  $J = 4$  Hz), 7.17 (d, 2H,  $J = 8$  Hz), 7.43 (s, 1H), 7.55 (d, 2H,  $J = 8$  Hz).

**<sup>13</sup>C{<sup>1</sup>H} NMR** (100 MHz, CDCl<sub>3</sub>, 298K)  $\delta$  (ppm) 21.2, 104.2, 111.5, 123.7, 128.2, 129.3, 137.1, 141.6, 154.2.

**2-(4-Methoxyphenyl)thiophene (6b):**<sup>14</sup>

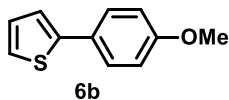

The crude product was purified by column chromatography using silica gel (100-200 mesh) with 5% ethylacetate in hexane. The compound was obtained as a colorless solid.

**<sup>1</sup>H NMR** (400 MHz, CDCl<sub>3</sub>, 298K)  $\delta$  (ppm) 3.84 (s, 3H), 6.92 (d, 2H,  $J = 8$  Hz), 7.05 (dd, 1H,  $J_1 = 4$  Hz,  $J_2 = 1$  Hz), 7.21 (t, 2H,  $J = 4$  Hz), 7.54 (d, 2H,  $J = 8$  Hz).

**<sup>13</sup>C{<sup>1</sup>H} NMR** (100 MHz, CDCl<sub>3</sub>, 298K)  $\delta$  (ppm) 55.3, 114.2, 122.1, 123.8, 127.2, 127.4, 127.9, 144.3, 159.2.

## 2-Biphenylthiophene (6e):<sup>21</sup>

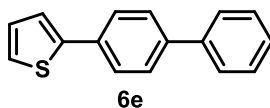

The crude product was purified by column chromatography using silica gel (100-200 mesh) with 2% ethylacetate in hexane. The compound was obtained as a colorless solid.

**<sup>1</sup>H NMR** (400 MHz, CDCl<sub>3</sub>, 298K)  $\delta$  (ppm) 7.10-7.12 (m, 1H), 7.31 (d, 1H,  $J = 6$  Hz), 7.36-7.38 (m, 2H), 7.46 (t, 2H,  $J = 8$  Hz), 7.62 (m, 4H), 7.70 (d, 2H,  $J = 9$  Hz).

**<sup>13</sup>C{<sup>1</sup>H} NMR** (100 MHz, CDCl<sub>3</sub>, 298K)  $\delta$ (ppm) 123.1, 124.8, 126.3, 126.9, 127.4, 127.5, 128.0, 128.8, 133.4, 140.2, 140.5, 144.0.

## 2-(4-Methylphenyl)thiophene (6f):<sup>14</sup>

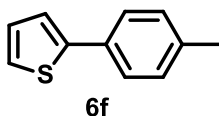

The crude product was purified by column chromatography using silica gel (100-200 mesh) with hexane. The compound was obtained as a yellow colored oil.

**<sup>1</sup>H NMR** (400 MHz, CDCl<sub>3</sub>, 298K)  $\delta$  (ppm) 2.36 (s, 3H), 7.06 (dd, 1H,  $J_1 = 7$  Hz,  $J_2 = 4$  Hz), 7.18 (d, 2H,  $J = 8$  Hz), 7.23-7.27 (m, 2H), 7.51 (d, 2H,  $J = 8$  Hz).

**<sup>13</sup>C{<sup>1</sup>H} NMR** (100 MHz, CDCl<sub>3</sub>, 298K)  $\delta$ (ppm) 21.1, 122.5, 124.3, 125.9, 127.9, 129.5, 131.6, 137.3, 144.6.

**4-(benzofuran-2-yl)benzene (7b):**<sup>14</sup>

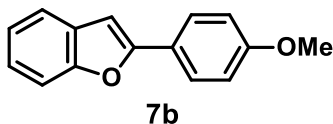

The crude product was purified by column chromatography using silica gel (100-200 mesh) with 5% ethylacetate in hexane. The compound was obtained as a brown colored solid

**<sup>1</sup>H NMR** (400 MHz, CDCl<sub>3</sub>, 298K)  $\delta$  (ppm) 3.87 (s, 3H), 6.89 (s, 1H), 6.98 (d, 2H,  $J = 8$  Hz), 7.21 (m, 2H), 7.50 (d, 1H,  $J = 4$  Hz), 7.55 (d, 1H,  $J = 4$  Hz), 7.80 (d, 2H,  $J = 8$  Hz).

**<sup>13</sup>C{<sup>1</sup>H} NMR** (100 MHz, CDCl<sub>3</sub>, 298K)  $\delta$  (ppm) 55.3, 99.6, 110.9, 114.2, 120.5, 122.8, 123.4, 123.7, 126.4, 129.5, 154.5, 156.0, 159.9.

**4-(benzofuran-2-yl)benzene (7c):**<sup>14</sup>

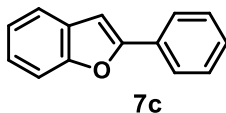

The crude product was purified by column chromatography using silica gel (100-200 mesh) with 5% ethylacetate in hexane. The compound was obtained as a colorless solid

**<sup>1</sup>H NMR** (400 MHz, CDCl<sub>3</sub>, 298K)  $\delta$  (ppm) 7.04 (s, 1H), 7.24-7.31 (m, 3H), 7.34 (t, 1H,  $J = 8$  Hz), 7.44 (t, 2H,  $J = 9$  Hz), 7.51 (d, 1H,  $J = 10$  Hz), 7.59 (d, 1H,  $J = 8$  Hz), 7.88 (d, 2H,  $J = 9$  Hz).

**<sup>13</sup>C{<sup>1</sup>H} NMR** (100 MHz, CDCl<sub>3</sub>, 298K)  $\delta$  (ppm) 101.3, 111.1, 120.8, 122.9, 124.2, 124.9, 128.5, 128.7, 130.5, 131.0, 154.8, 155.9.

**4-(benzofuran-2-yl)3, 5-dimethylbenzene (7d):**<sup>22</sup>

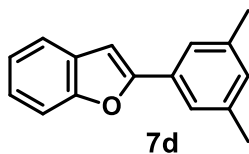

The crude product was purified by column chromatography using silica gel (100-200 mesh) with 5% ethylacetate in hexane. The compound was obtained as a light colorless solid.

**<sup>1</sup>H NMR** (400 MHz, CDCl<sub>3</sub>, 298K)  $\delta$  (ppm) 2.39 (s, 6H), 7.00 (s, 1H), 7.21-7.30 (m, 3 H), 7.51—7.53 (m, 3H), 7.57 (d, 1 H,  $J = 8$  Hz).

**<sup>13</sup>C{<sup>1</sup>H} NMR** (100 MHz, CDCl<sub>3</sub>, 298K)  $\delta$ (ppm) 21.3, 101.0, 111.1, 120.8, 122.8, 122.8, 124.0, 129.3, 130.3, 130.4, 138.3, 154.8, 156.3.

**4-(benzofuran-2-yl)biphenyl (7e):**<sup>23</sup>

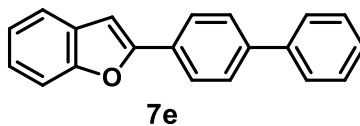

The crude product was purified by column chromatography using silica gel (100-200 mesh) with 5% ethylacetate in hexane. The compound was obtained as a colorless solid

**<sup>1</sup>H NMR** (400 MHz, CDCl<sub>3</sub>, 298K)  $\delta$  (ppm) 7.07 (s, 1H), 7.4-7.30 (m, 2H), 7.38 (t, 1H,  $J = 4$  Hz), 7.45 (t, 2H,  $J = 8$  Hz), 7.55 (d, 1H,  $J = 8$  Hz), 7.60 (d, 1H,  $J = 8$ Hz), 7.65 (d, 2H,  $J = 8$  Hz), 7.69 (d, 2H,  $J = 10$  Hz), 7.95 (d, 2H,  $J = 8$  Hz).

**<sup>13</sup>C{<sup>1</sup>H} NMR** (100 MHz, CDCl<sub>3</sub>, 298K)  $\delta$ (ppm) 101.4, 111.1, 120.9, 122.9, 124.3, 125.3, 126.9, 127.4, 127.6, 128.8, 129.2, 129.4, 140.4, 141.2, 154.9, 155.7.

**2-(4-Methoxyphenyl)thiazole (11b):**<sup>24</sup>

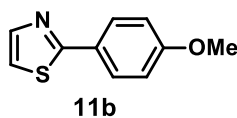

The crude product was purified by column chromatography using silica gel (100-200 mesh) with 10% ethylacetate in hexane. The compound was obtained as a light yellow colored oil.

**<sup>1</sup>H NMR** (400 MHz, CDCl<sub>3</sub>, 298K)  $\delta$  (ppm) 3.86 (s, 3H), 6.96 (dd, 2H,  $J_1 = 7$  Hz,  $J_2 = 4$  Hz), 7.25 (m, 1H), 7.81 (s, 1H), 7.91 (dd, 2H,  $J_1 = 9$  Hz,  $J_2 = 3$  Hz)

**<sup>13</sup>C{<sup>1</sup>H} NMR** (100 MHz, CDCl<sub>3</sub>, 298K)  $\delta$ (ppm) 55.4, 114.3, 117.8, 126.6, 128.0, 143.4, 161.1, 168.3.

**2-Phenylthiazole (11c):**<sup>24</sup>

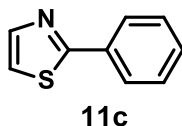

The crude product was purified by column chromatography using silica gel (100-200 mesh) with 10% ethylacetate in hexane. The compound was obtained as a colorless oil.

**<sup>1</sup>H NMR** (400 MHz, CDCl<sub>3</sub>, 298K)  $\delta$  (ppm) 7.34 (d, 1H,  $J = 4$  Hz), 7.43-7.76 (m, 4H), 7.87 (d, 1H,  $J = 4$  Hz), 7.97 (d, 2H,  $J = 8$  Hz).

**<sup>13</sup>C{<sup>1</sup>H} NMR** (100 MHz, CDCl<sub>3</sub>, 298K)  $\delta$ (ppm) 118.9, 126.6, 128.9, 130.1, 133.7, 143.7, 168.5.

**2-(3, 5-Dimethylphenyl)thiazole (11d):**<sup>24</sup>

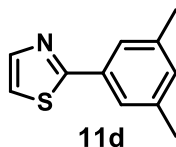

The crude product was purified by column chromatography using silica gel (100-200 mesh) with 10% ethylacetate in hexane. The compound was obtained as a colorless oil.

**<sup>1</sup>H NMR** (400 MHz, CDCl<sub>3</sub>, 298K)  $\delta$  (ppm) 2.4 (s, 6H), 7.07 (s, 1H), 7.30 (d, 1H,  $J = 4$  Hz), 7.59 (s, 2H), 7.84 (d, 1H,  $J = 4$  Hz).

**<sup>13</sup>C{<sup>1</sup>H} NMR** (100 MHz, CDCl<sub>3</sub>, 298K)  $\delta$ (ppm) 21.2, 118.5, 124.4, 131.7, 133.4, 138.6, 143.5, 168.8.

**2-Biphenylthiazole (11e):**<sup>25</sup>

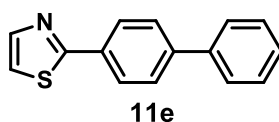

The crude product was purified by column chromatography using silica gel (100-200 mesh) with 10% ethylacetate in hexane. The compound was obtained as a brown colored oil.

**<sup>1</sup>H NMR** (400 MHz, CDCl<sub>3</sub>, 298K)  $\delta$  (ppm) 7.34 (d, 1H,  $J = 4$  Hz), 7.40 (d, 1H,  $J = 4$  Hz), 7.47 (t, 2H,  $J = 8$  Hz), 7.65 (d, 2H,  $J = 8$  Hz), 7.69 (d, 2H,  $J = 9$  Hz), 7.90 (d, 1H,  $J = 4$  Hz), 8.05 (d, 2H,  $J = 9$  Hz).



$^{13}\text{C}\{^1\text{H}\}$  NMR (100 MHz,  $\text{CDCl}_3$ , 298K)  $\delta$ (ppm) 118.8, 126.9, 127.0, 127.6, 127.8, 128.9, 132.5, 140.2, 142.7, 143.7, 168.1.

2-(4-Methylphenyl)thiazole (**11f**):<sup>24</sup>

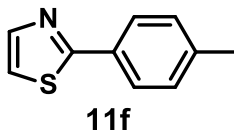

The crude product was purified by column chromatography using silica gel (100-200 mesh) with 10% ethylacetate in hexane. The compound was obtained as a colorless oil.

$^1\text{H}$  NMR (400 MHz,  $\text{CDCl}_3$ , 298K)  $\delta$  (ppm) 2.4 (s, 3H), 7.23 (m, 2H), 7.27 (m, 1H), 7.82-7.85 (m, 3H).

$^{13}\text{C}\{^1\text{H}\}$  NMR (100 MHz,  $\text{CDCl}_3$ , 298K)  $\delta$ (ppm) 21.4, 118.3, 126.5, 129.5, 129.6, 130.9, 140.2, 143.5, 168.6.

22.  $^1\text{H}$  and  $^{13}\text{C}$  NMR spectra of the catalytic products.

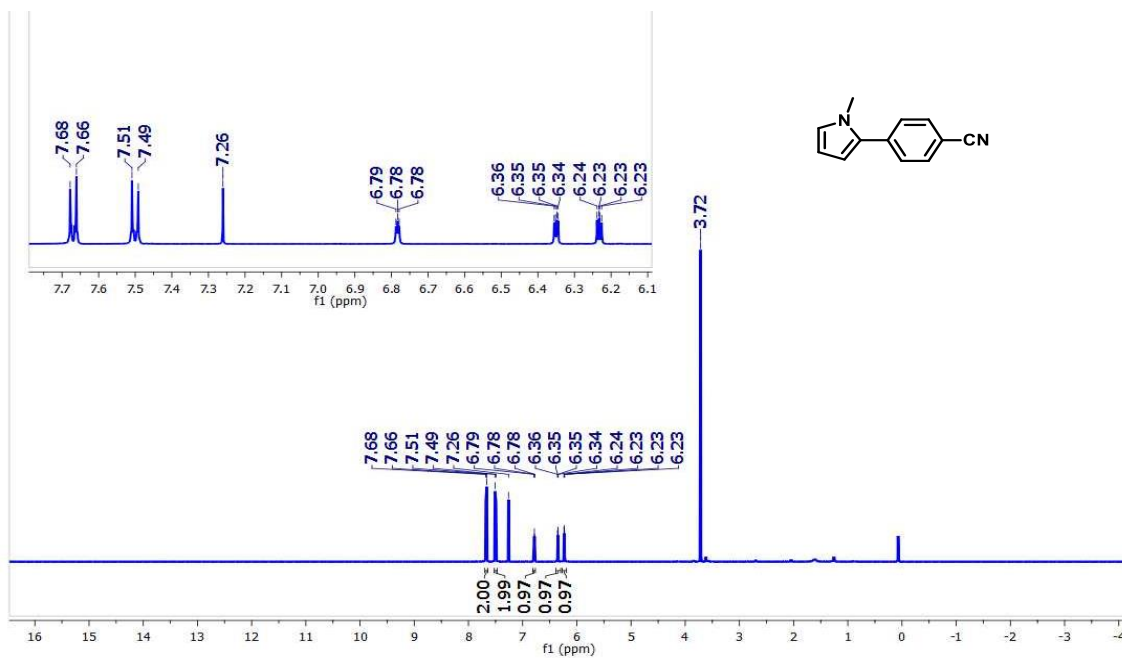

Figure S28.  $^1\text{H}$  NMR ( $\text{CDCl}_3$ ) spectrum of 4-(1-methylpyrrole)benzonitrile (**4a**).

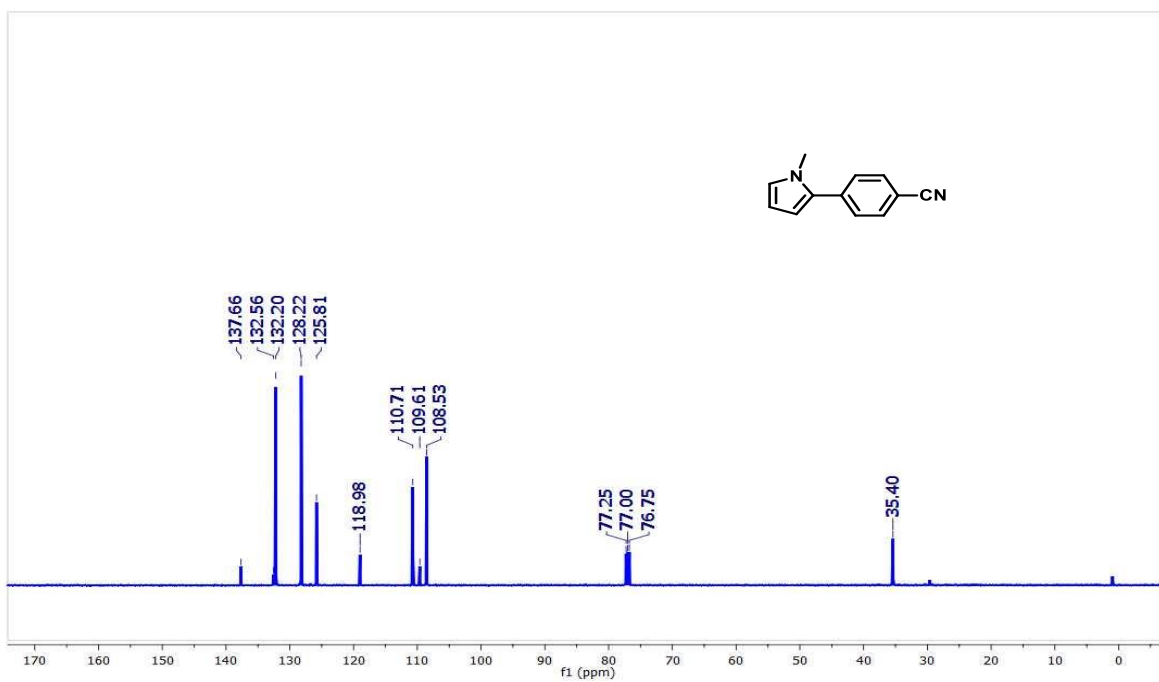

Figure S29.  $^{13}\text{C}$  NMR ( $\text{CDCl}_3$ ) spectrum of 4-(1-methylpyrrole)benzonitrile (**4a**).

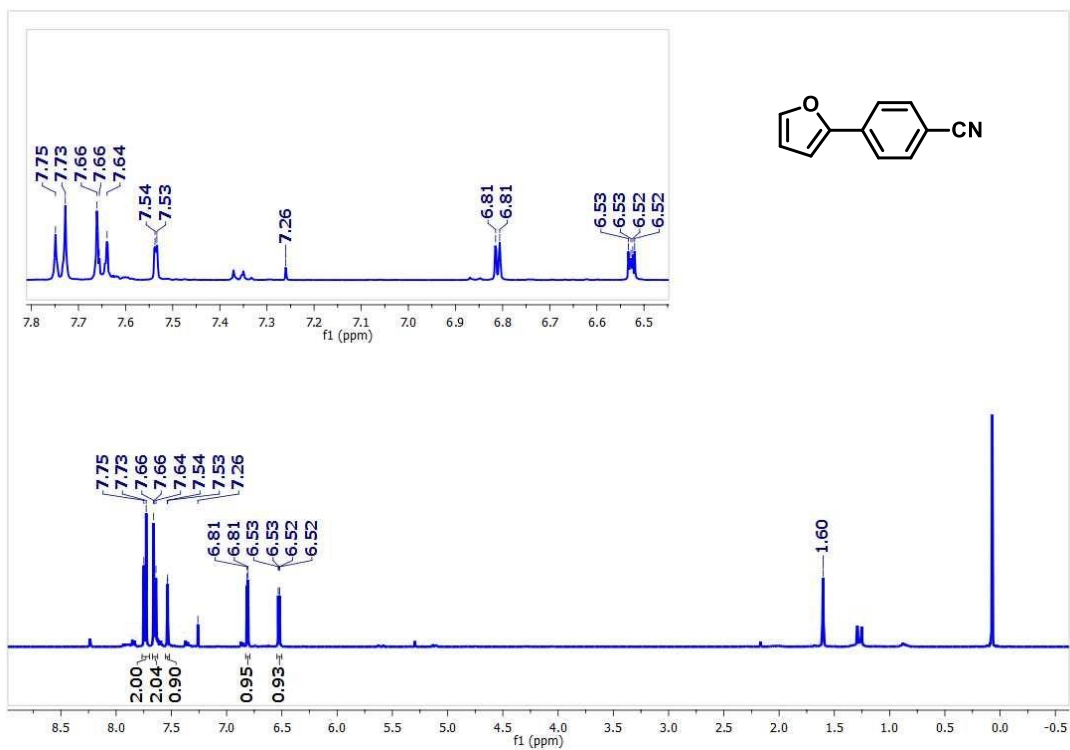

**Figure S30.**  $^1\text{H}$  NMR ( $\text{CDCl}_3$ ) spectrum of 2-(4-cyanophenyl)furan (**5a**).

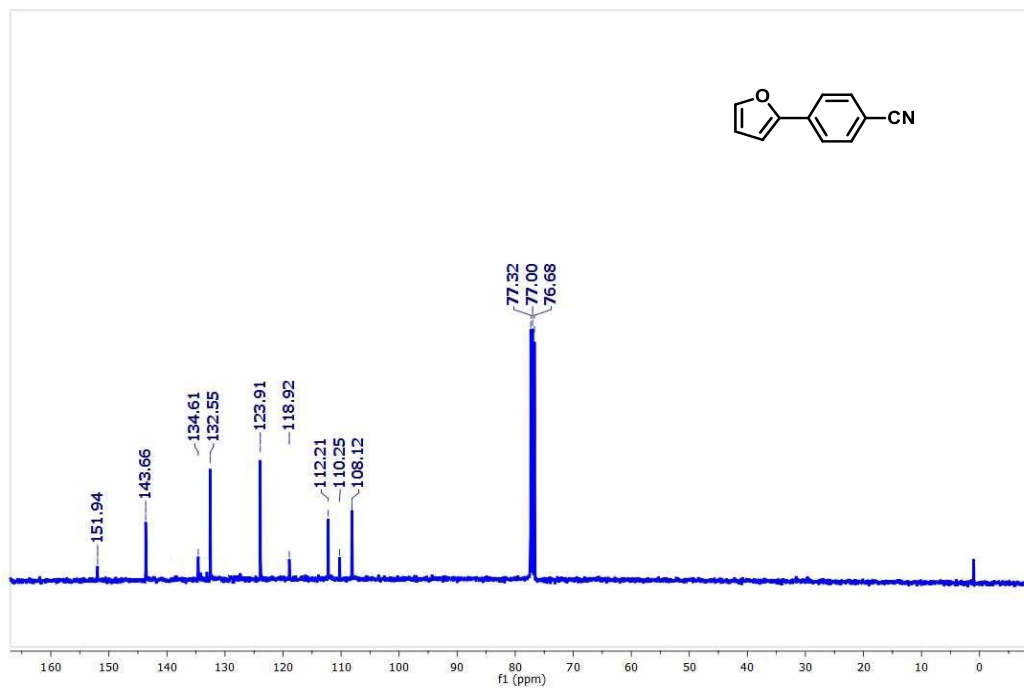

**Figure S31.**  $^{13}\text{C}$  NMR ( $\text{CDCl}_3$ ) spectrum of 2-(4-cyanophenyl)furan (**5a**).

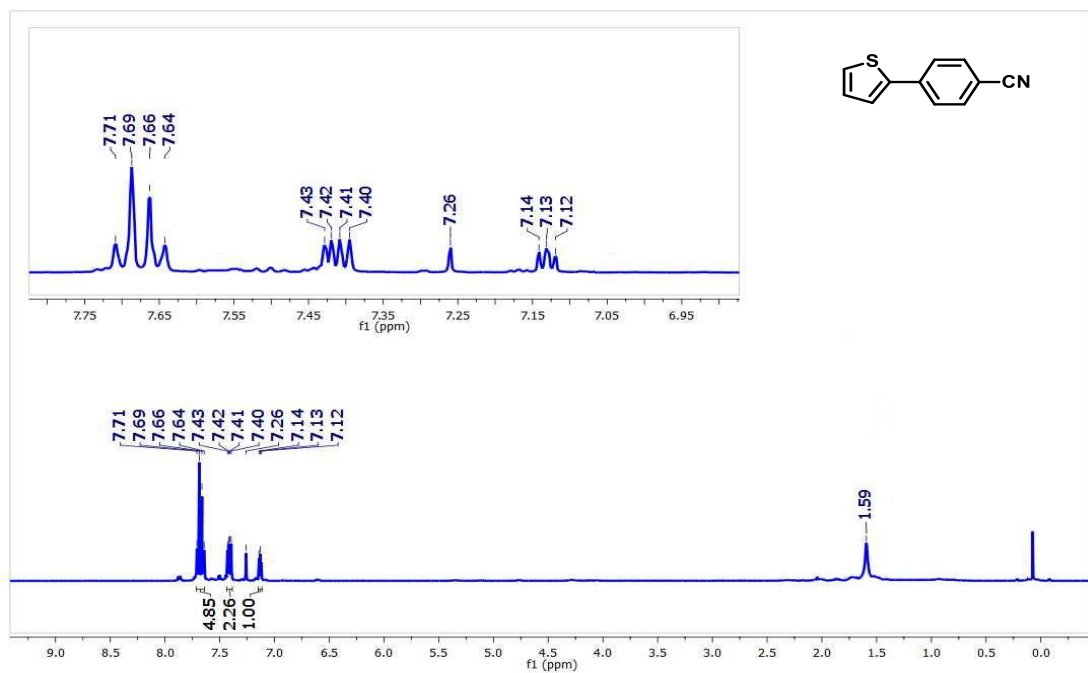

**Figure S32.** <sup>1</sup>H NMR (CDCl<sub>3</sub>) spectrum of 2-(4-cyanophenyl)thiophene (**6a**).

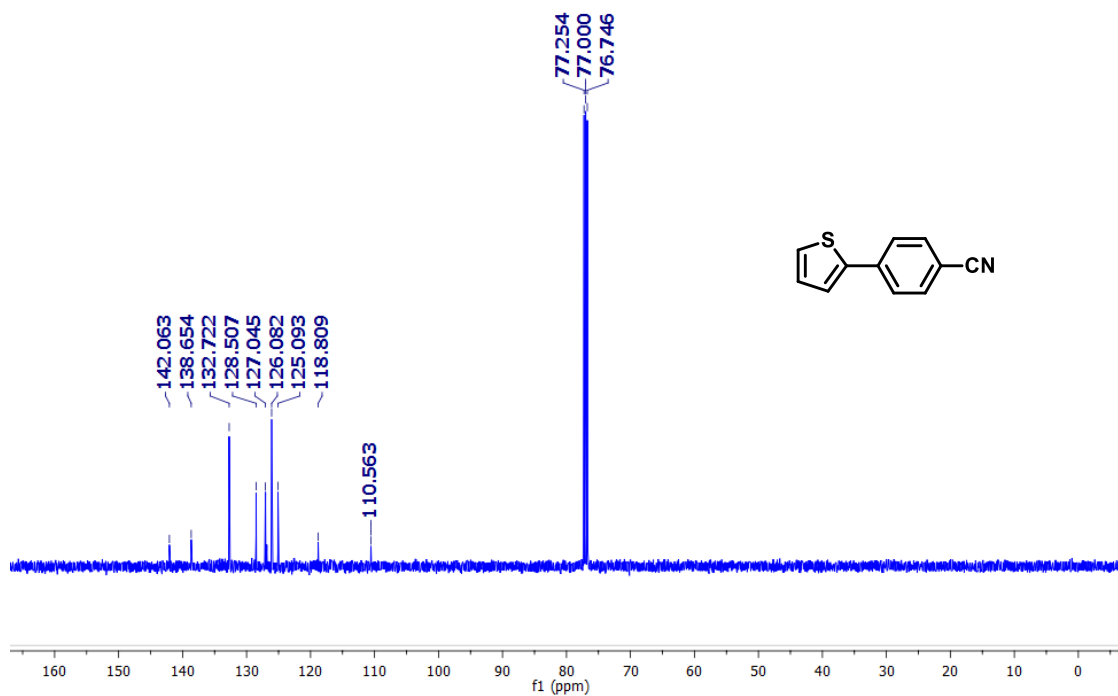

**Figure S33.** <sup>13</sup>C NMR (CDCl<sub>3</sub>) spectrum of 2-(4-cyanophenyl)thiophene (**6a**).

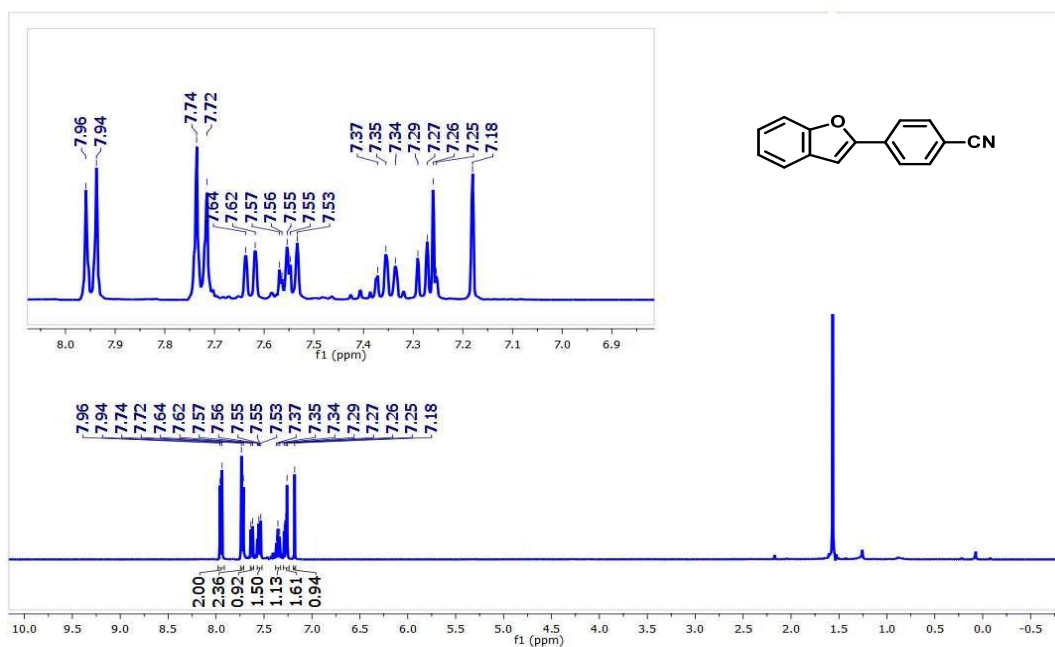

**Figure S34.** <sup>1</sup>H NMR (CDCl<sub>3</sub>) spectrum of 4-(benzofuran-2-yl)benzonitrile (**7a**).

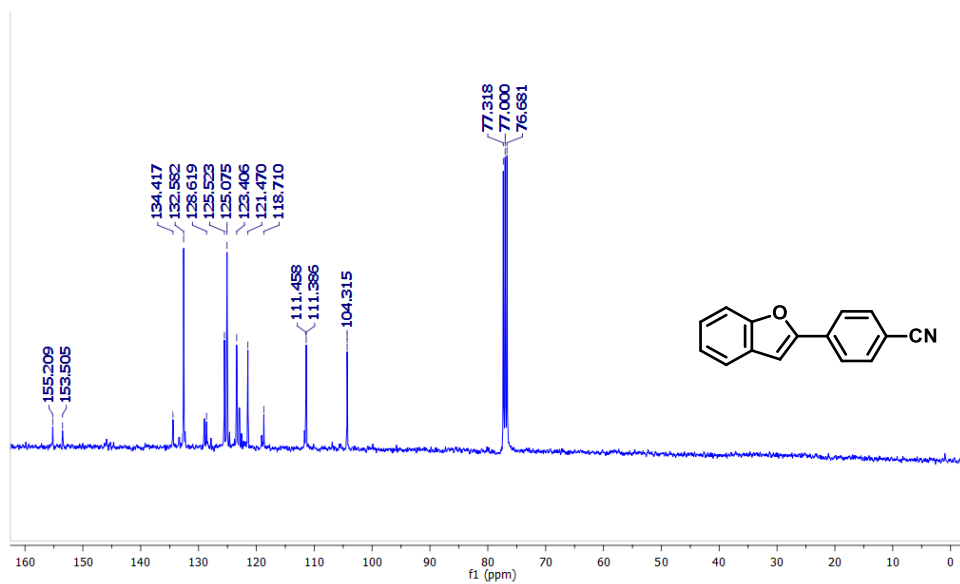

**Figure S35.** <sup>13</sup>C NMR (CDCl<sub>3</sub>) spectrum of 4-(benzofuran-2-yl)benzonitrile (**7a**).

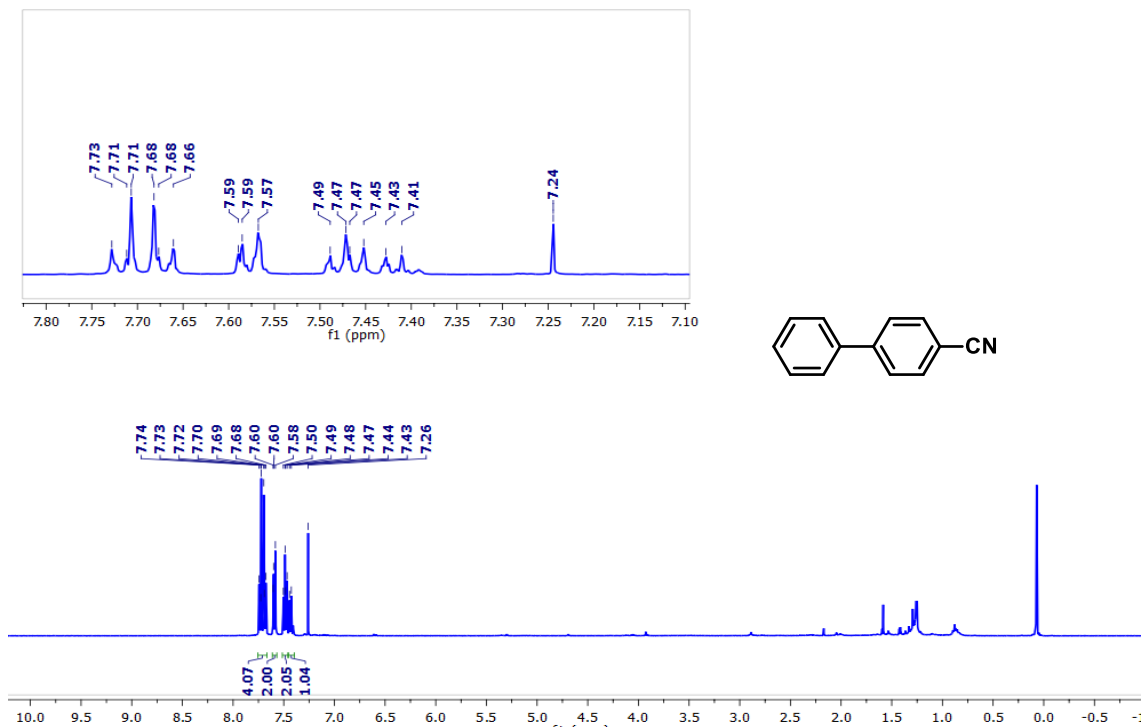

Figure S36.  $^1\text{H}$  NMR ( $\text{CDCl}_3$ ) spectrum of 4-cyanobiphenyl (**8a**).

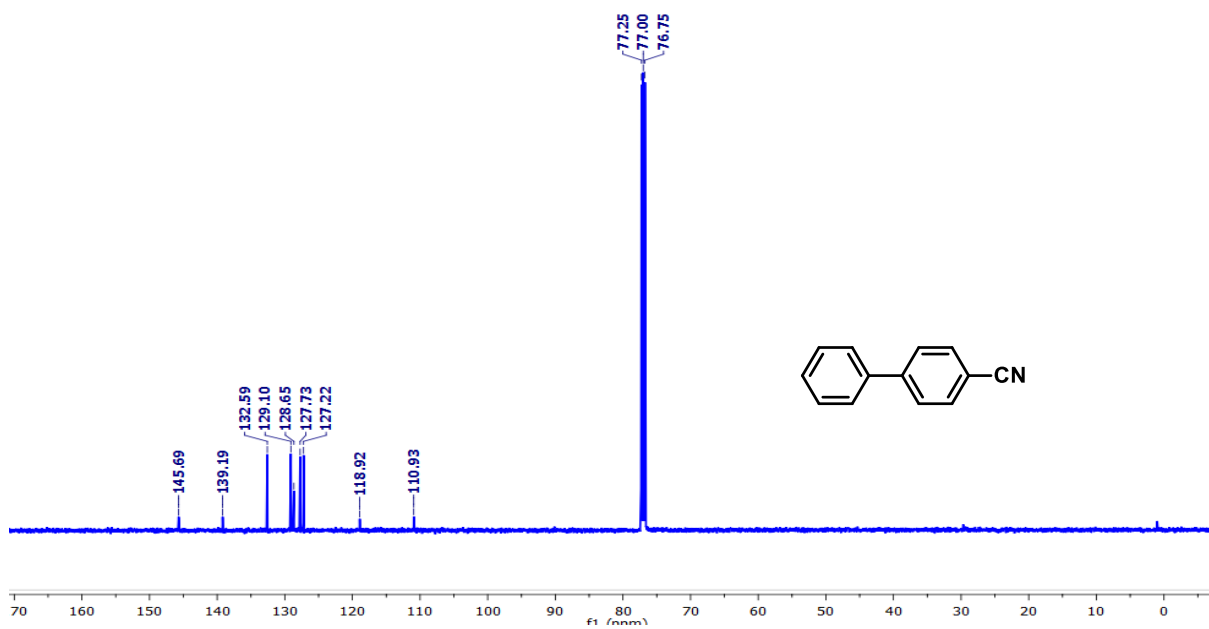

Figure S37.  $^{13}\text{C}$  NMR ( $\text{CDCl}_3$ ) spectrum of 4-cyanobiphenyl (**8a**).

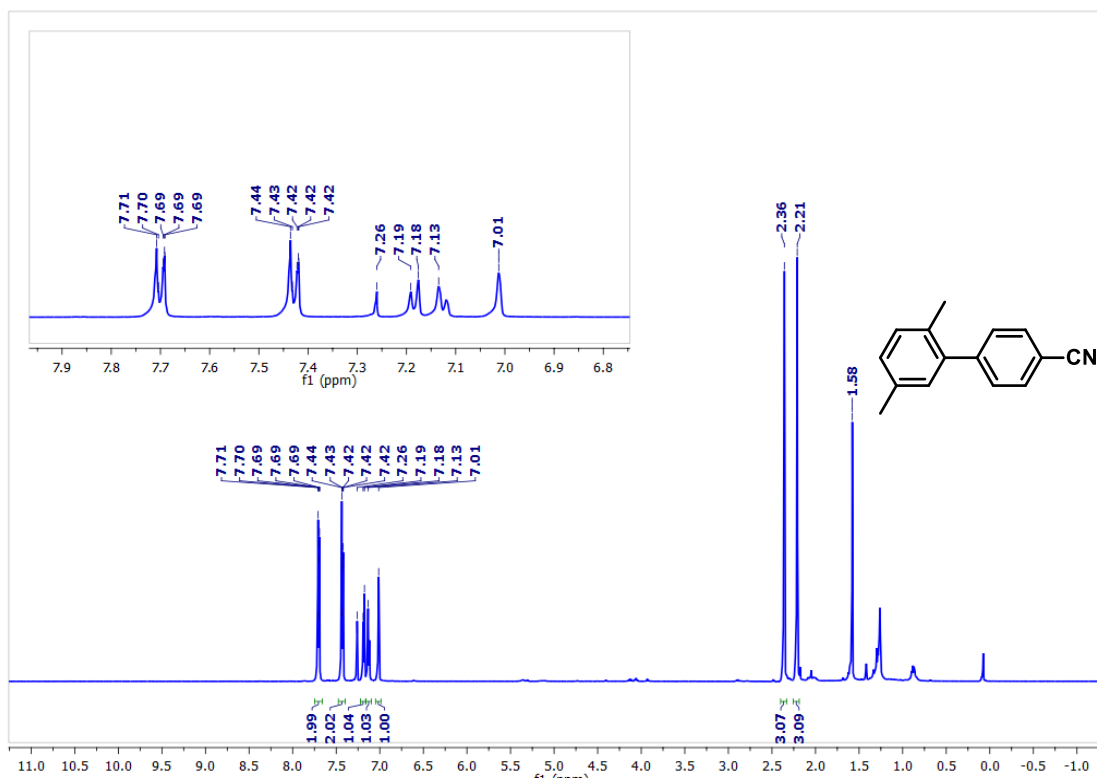

**Figure S38.**  $^1\text{H}$  NMR ( $\text{CDCl}_3$ ) spectrum of 1-cyano-4-(2,5-dimethylbenzene) (**9a**).

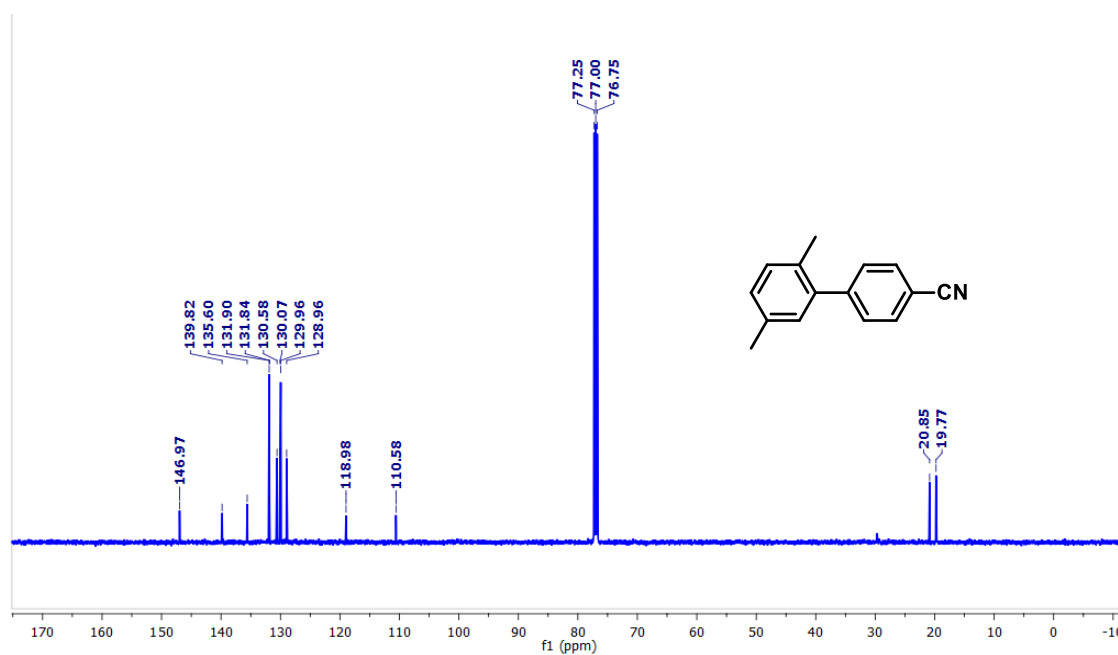

**Figure S39.**  $^{13}\text{C}$  NMR ( $\text{CDCl}_3$ ) spectrum of 1-cyano-4-(2,5-dimethylbenzene) (**9a**).

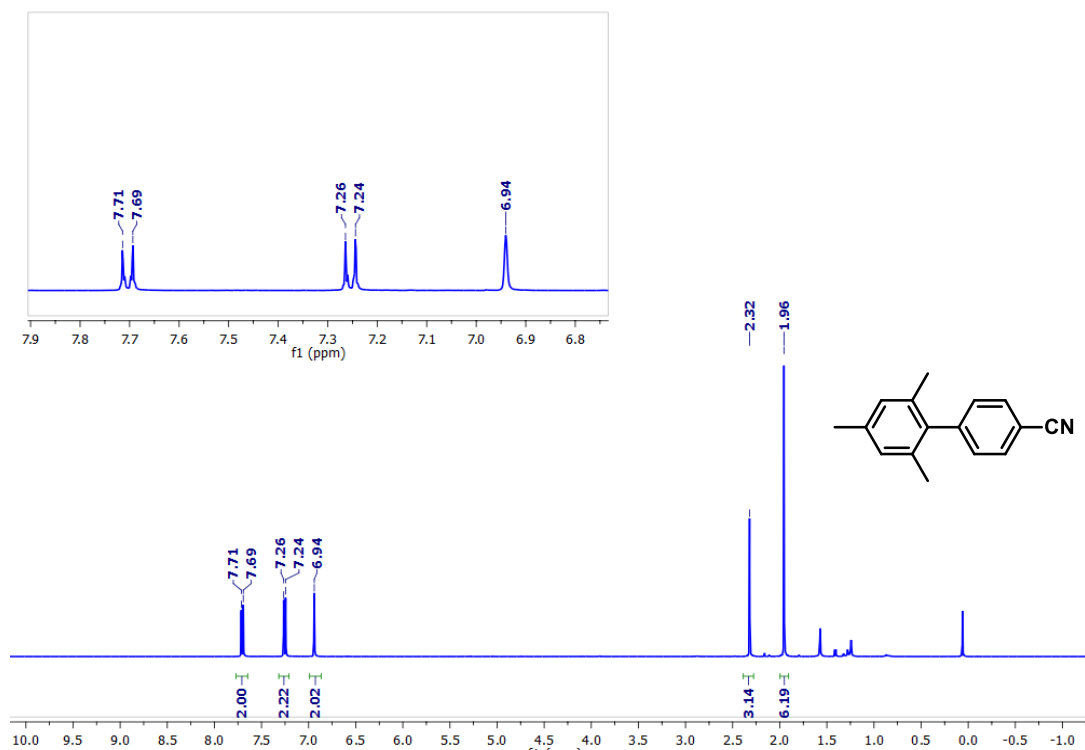

**Figure S40.** <sup>1</sup>H NMR (CDCl<sub>3</sub>) spectrum of 1-cyano-4-mesitylbenzene (**10a**).

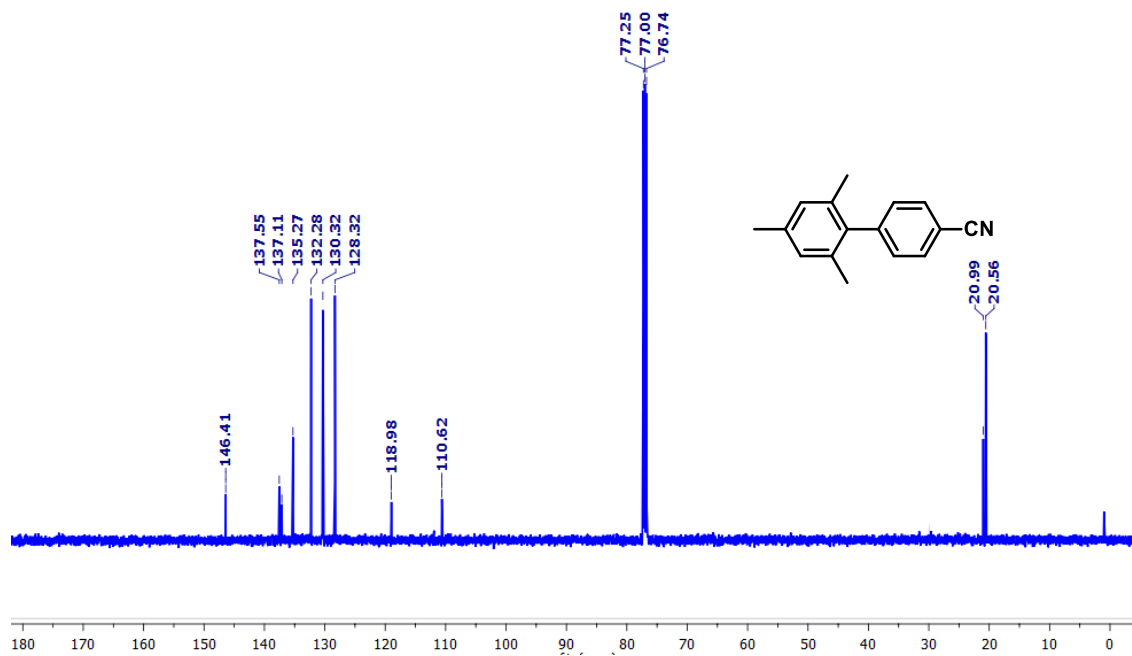

**Figure S41.** <sup>13</sup>C NMR (CDCl<sub>3</sub>) spectrum of 1-cyano-4-mesitylbenzene (**10a**).



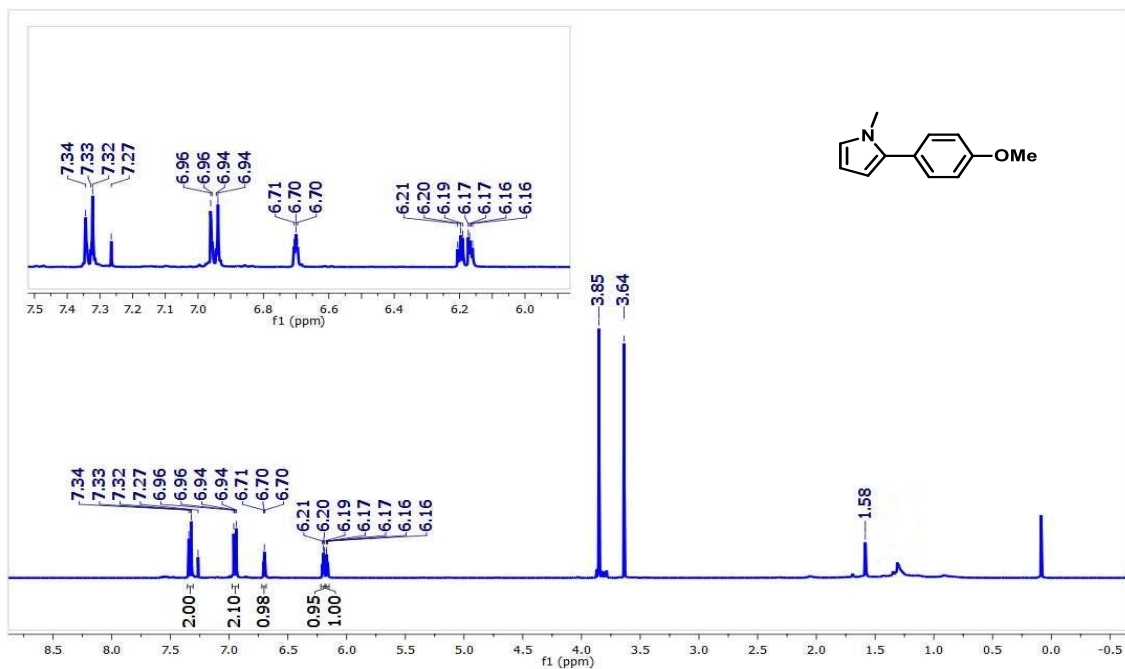

**Figure S42.**  $^1\text{H}$  NMR ( $\text{CDCl}_3$ ) spectrum of 4-(1-methylpyrrole)anisole (**4b**).

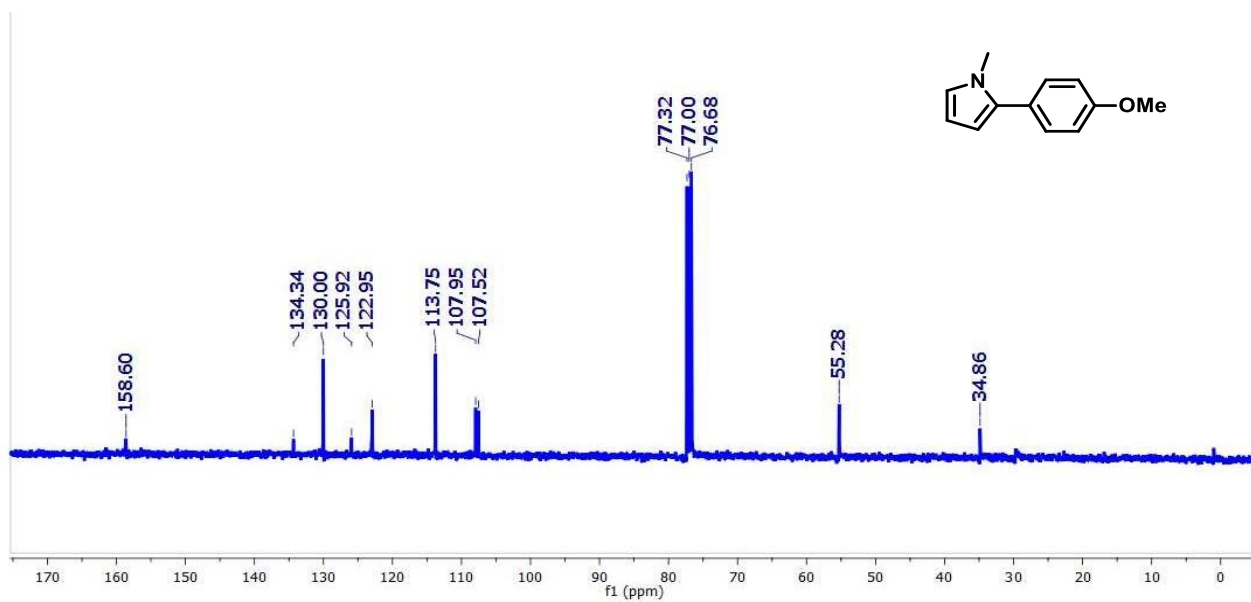

**Figure S43.**  $^{13}\text{C}$  NMR ( $\text{CDCl}_3$ ) spectrum of 4-(1-methylpyrrole)anisole (**4b**).

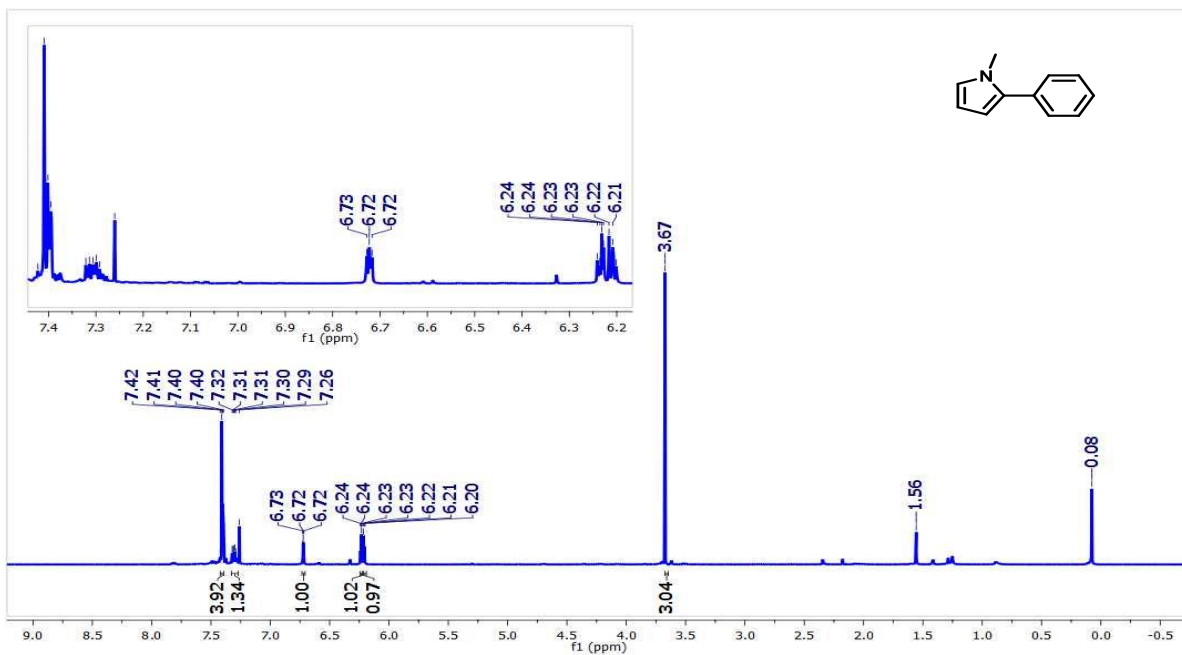

**Figure S44.** <sup>1</sup>H NMR (CDCl<sub>3</sub>) spectrum of 4-(1-methylpyrrole)benzene (**4c**).

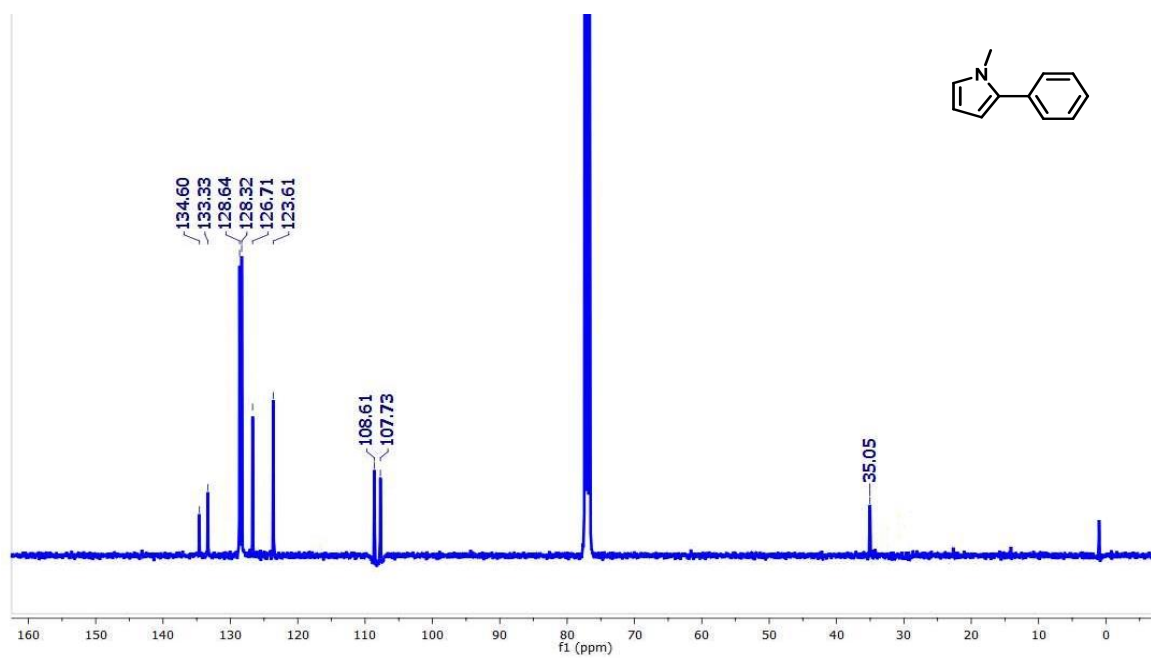

**Figure S45.** <sup>13</sup>C NMR (CDCl<sub>3</sub>) spectrum of 4-(1-methylpyrrole)benzene (**4c**).

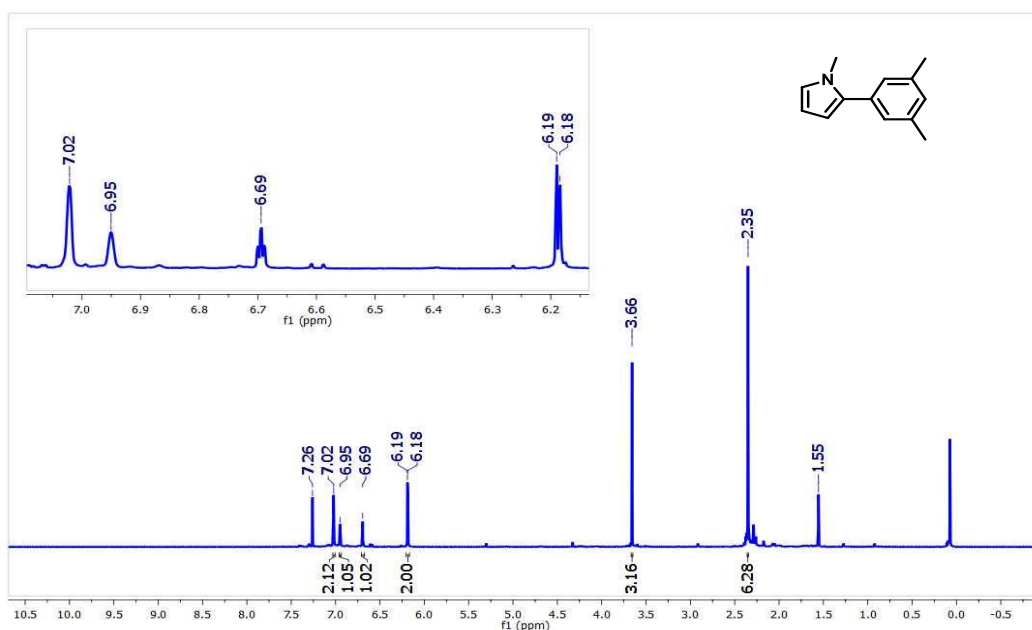

**Figure S46.**  $^1\text{H}$  NMR ( $\text{CDCl}_3$ ) spectrum of 4-(1-methylpyrrole)3,5-dimethylbenzene (**4d**).

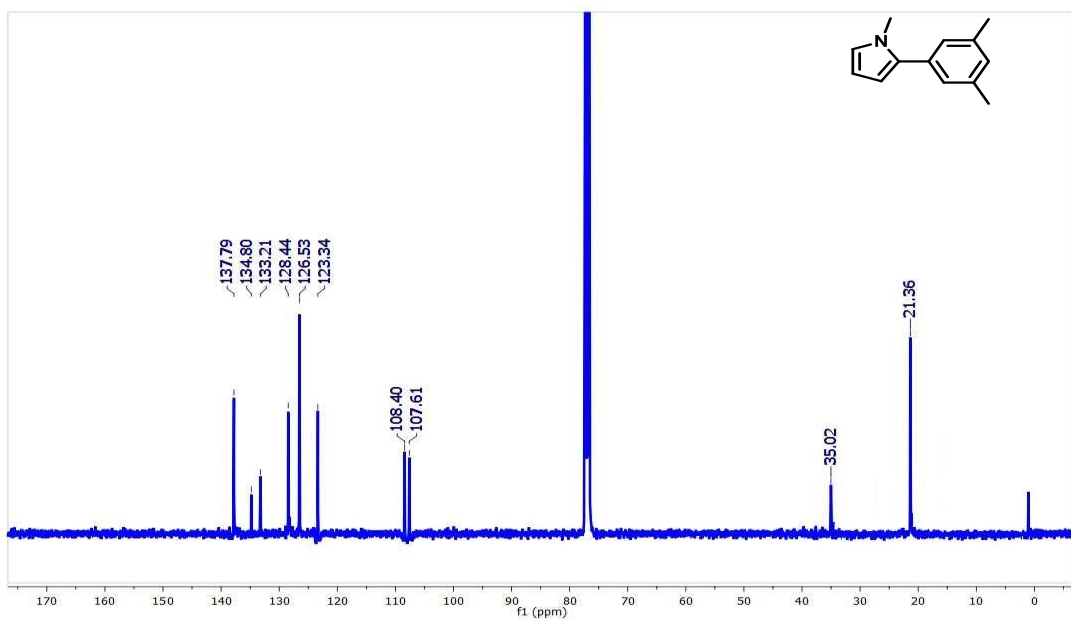

**Figure S47.**  $^{13}\text{C}$  NMR ( $\text{CDCl}_3$ ) spectrum of 4-(1-methylpyrrole)3,5-dimethylbenzene (**4d**).

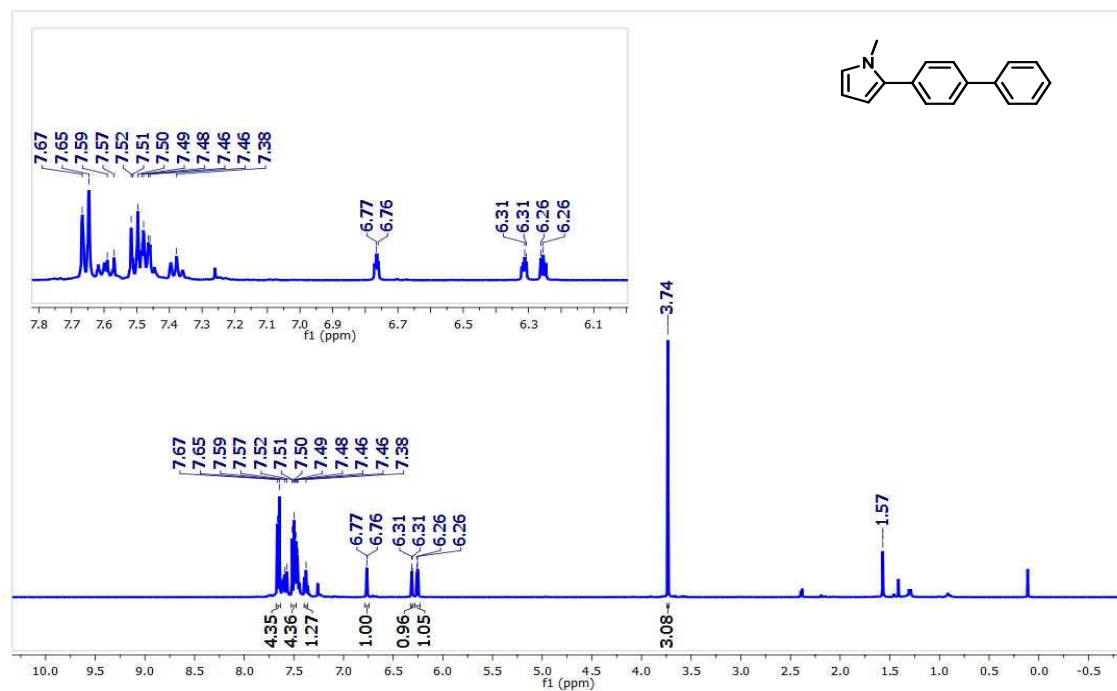

Figure S48. <sup>1</sup>H NMR (CDCl<sub>3</sub>) spectrum of 4-(1-methylpyrrole)biphenyl (4e).

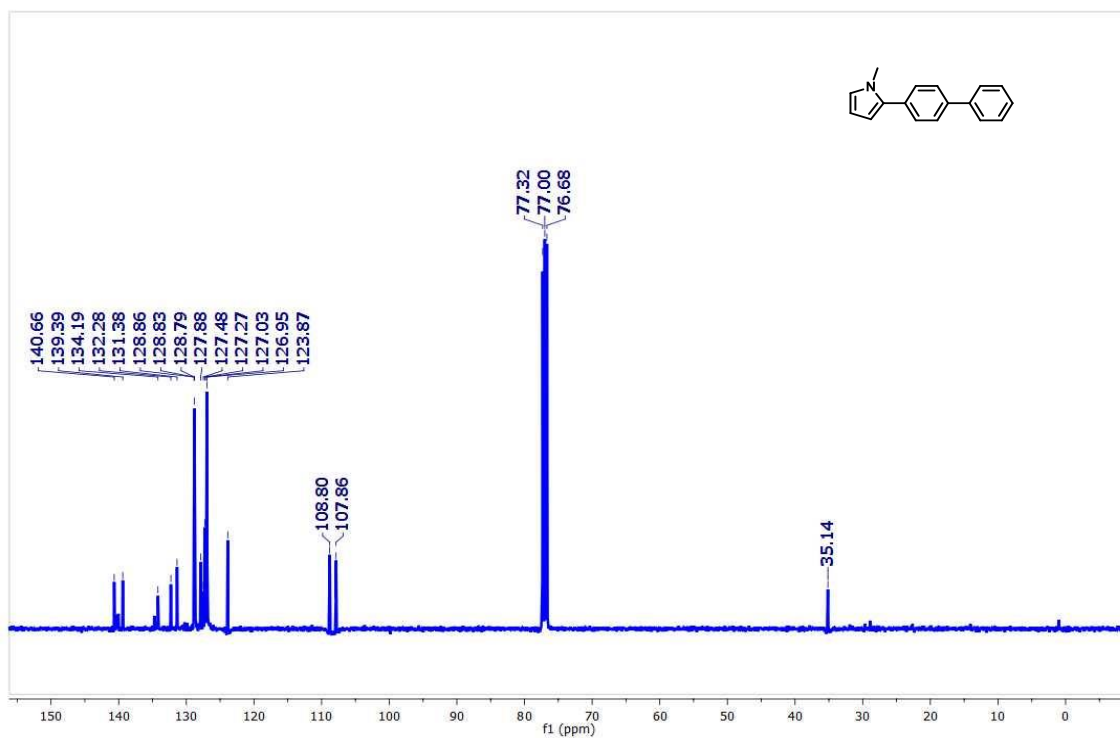

Figure S49. <sup>13</sup>C NMR (CDCl<sub>3</sub>) spectrum of 4-(1-methylpyrrole)biphenyl (4e).

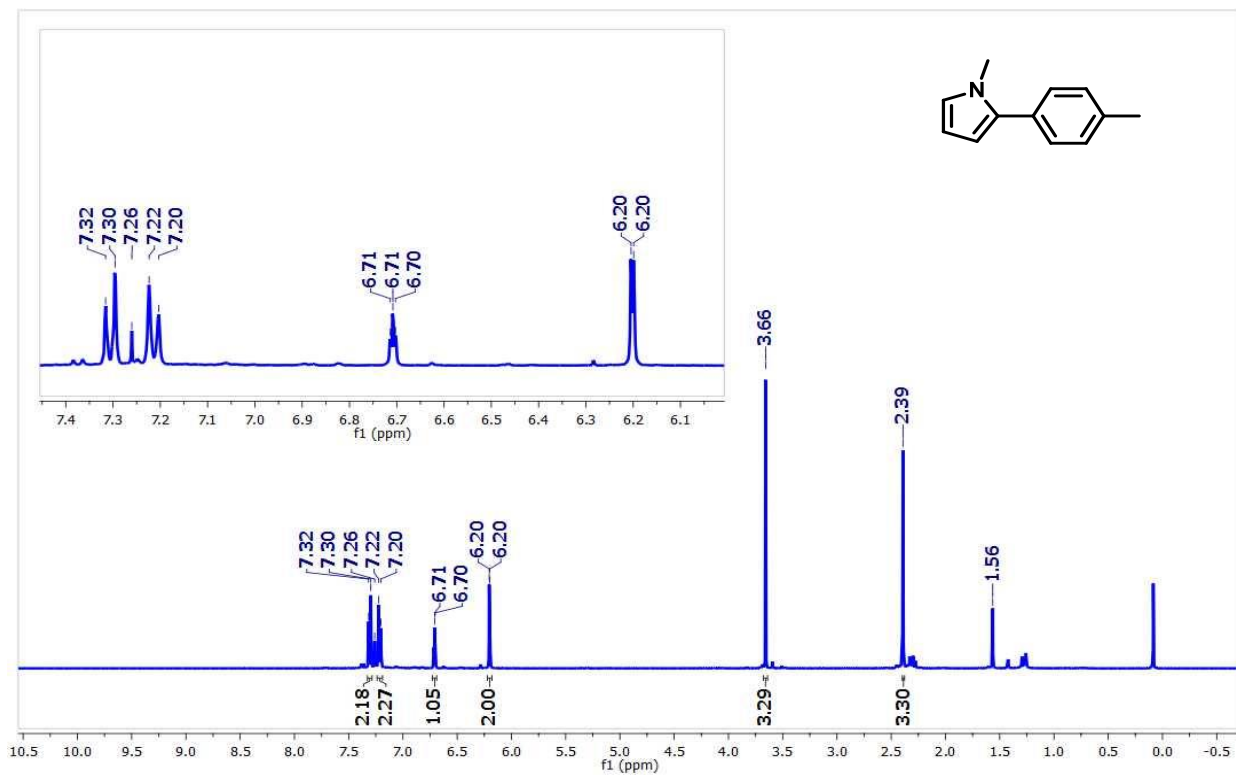

**Figure S50.**  $^1\text{H}$  NMR ( $\text{CDCl}_3$ ) spectrum of 4-(1-methylpyrrole)toluene (**4f**).

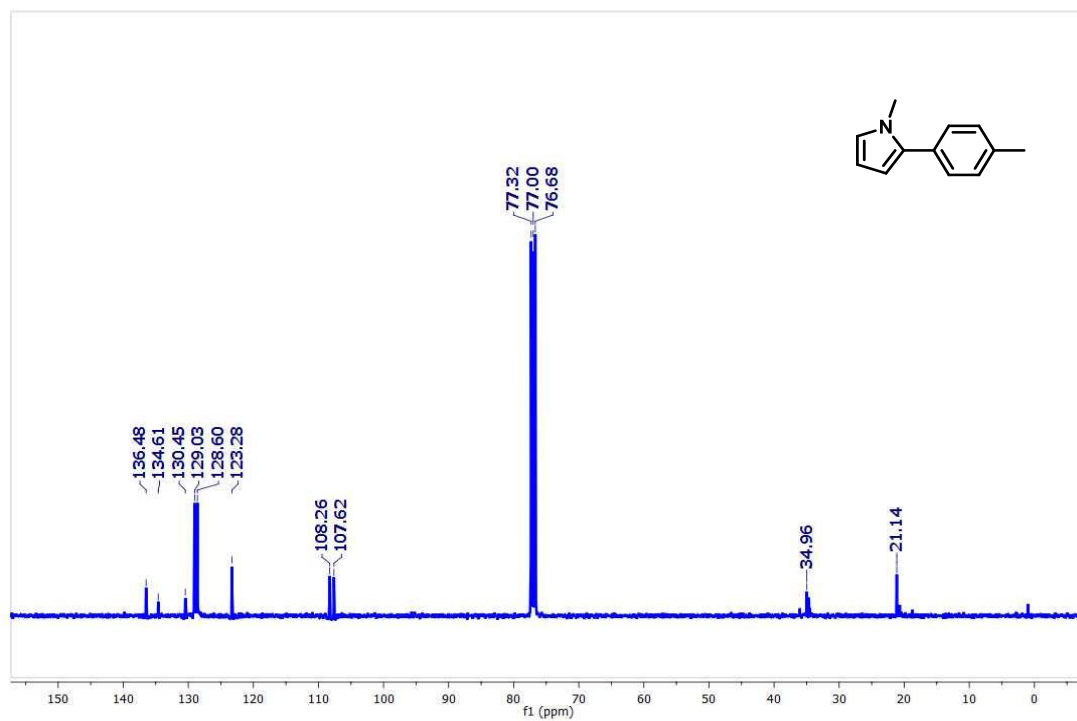

**Figure S51.**  $^{13}\text{C}$  NMR ( $\text{CDCl}_3$ ) spectrum of 4-(1-methylpyrrole)toluene (**4f**).

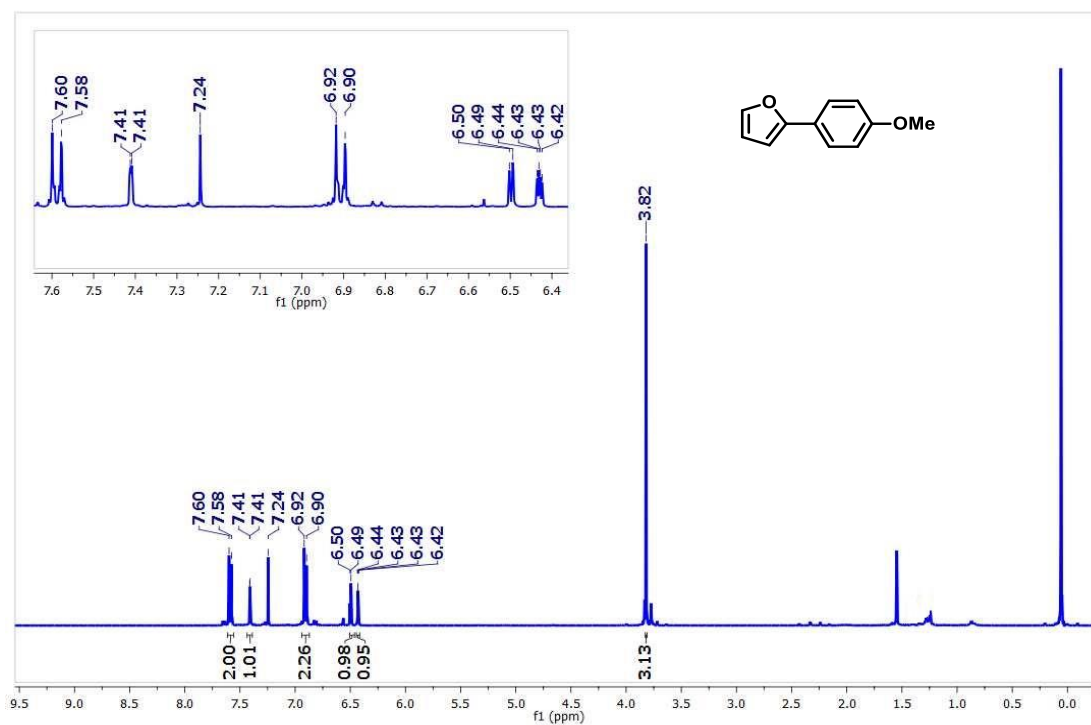

**Figure S52.**  $^1\text{H}$  NMR ( $\text{CDCl}_3$ ) spectrum of 2-(4-methoxyphenyl)furan (**5b**).

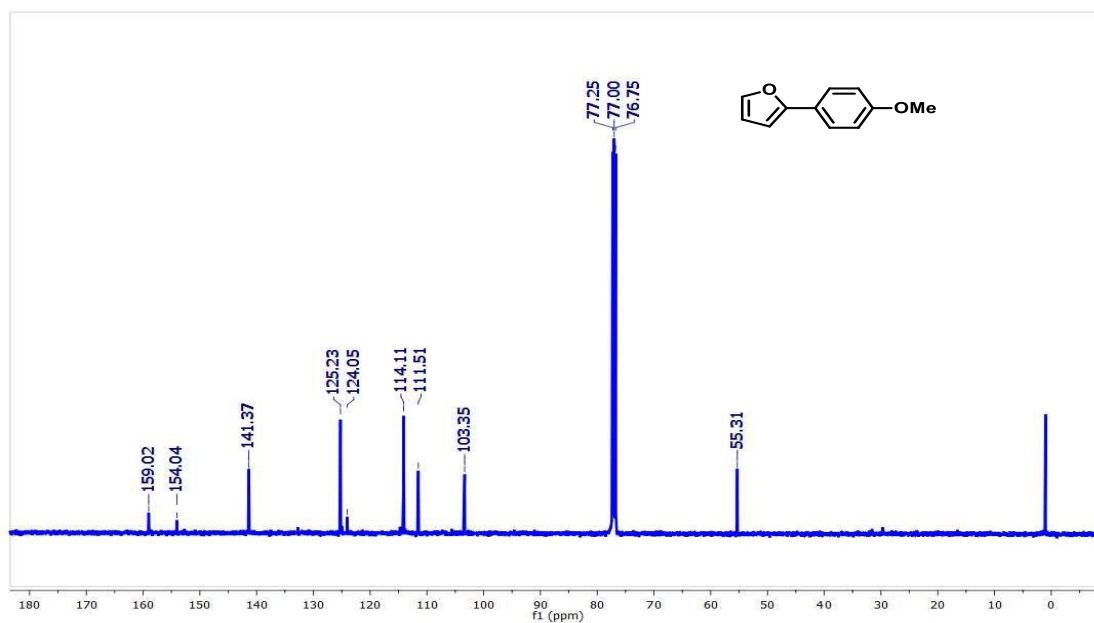

**Figure S53.**  $^{13}\text{C}$  NMR ( $\text{CDCl}_3$ ) spectrum of 2-(4-methoxyphenyl)furan (**5b**).

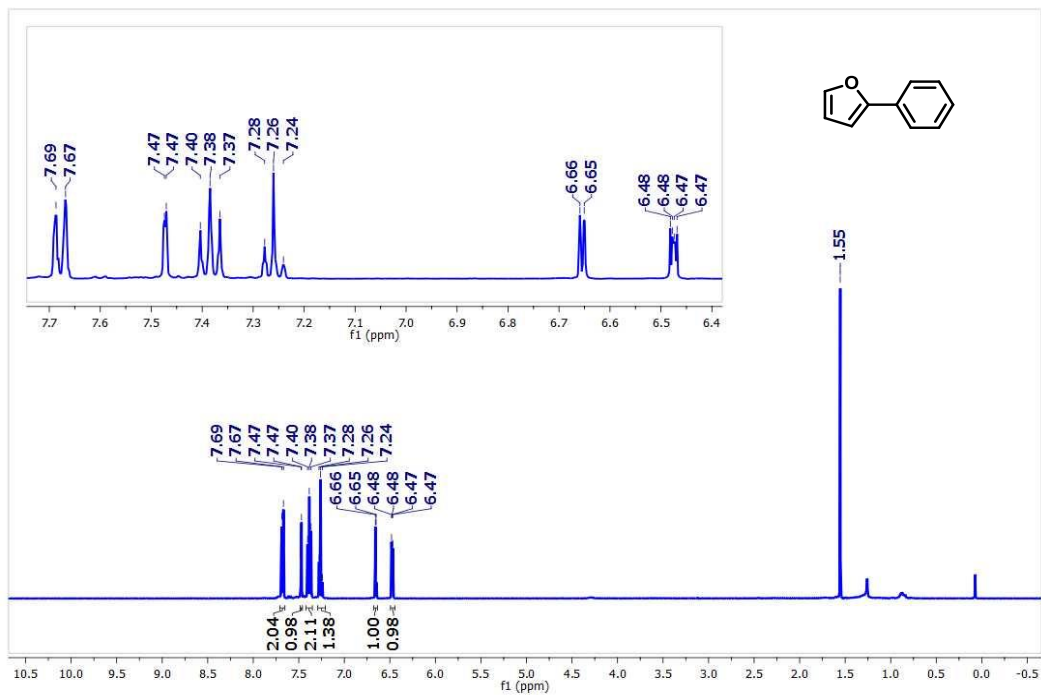

Figure S54.  $^1\text{H}$  NMR ( $\text{CDCl}_3$ ) spectrum of 2-phenylfuran (**5c**).

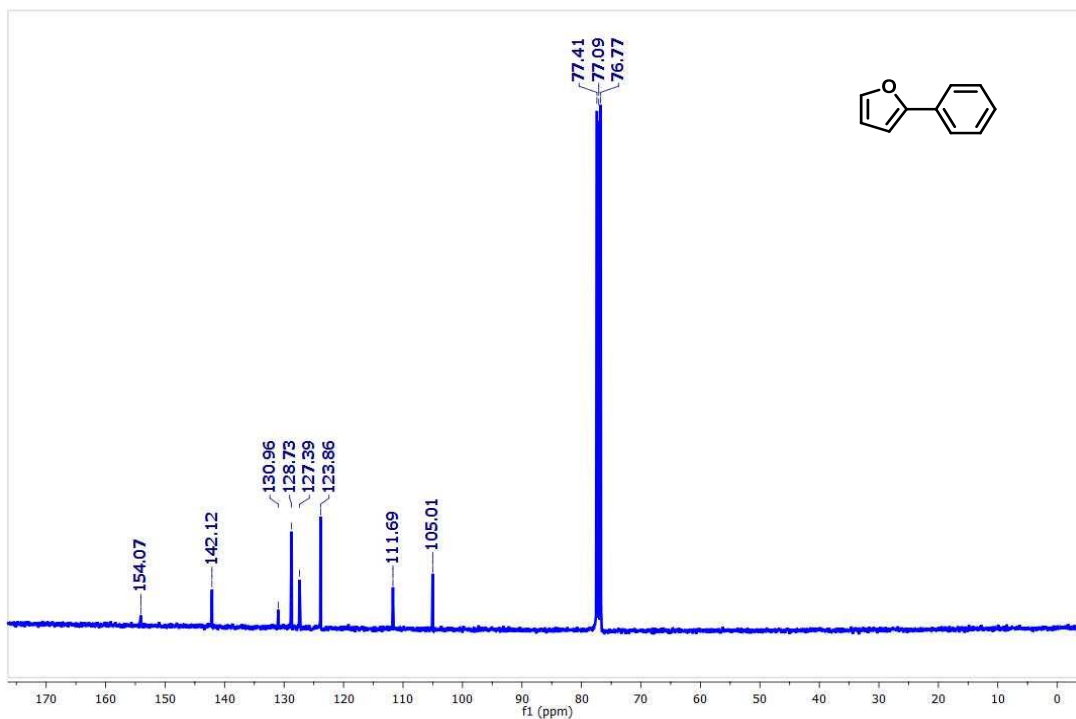

Figure S55.  $^{13}\text{C}$  NMR ( $\text{CDCl}_3$ ) spectrum of 2-phenylfuran (**5c**).

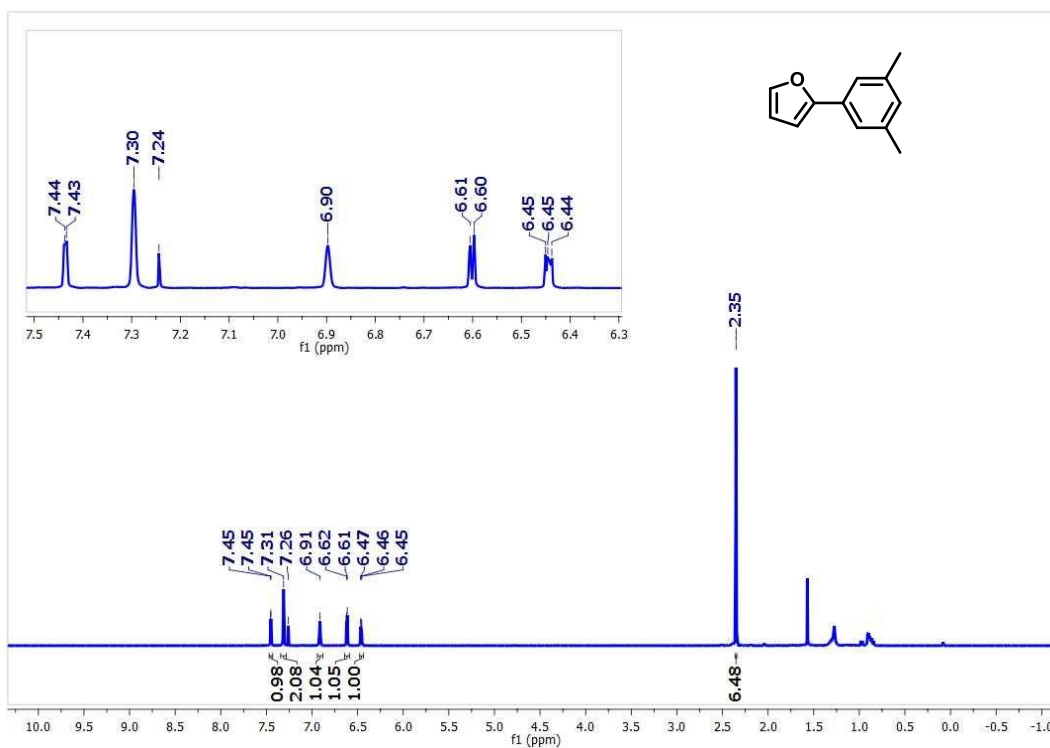

**Figure S56.**  $^1\text{H}$  NMR ( $\text{CDCl}_3$ ) spectrum of 2-(3,5-dimethylphenyl)furan (**5d**).

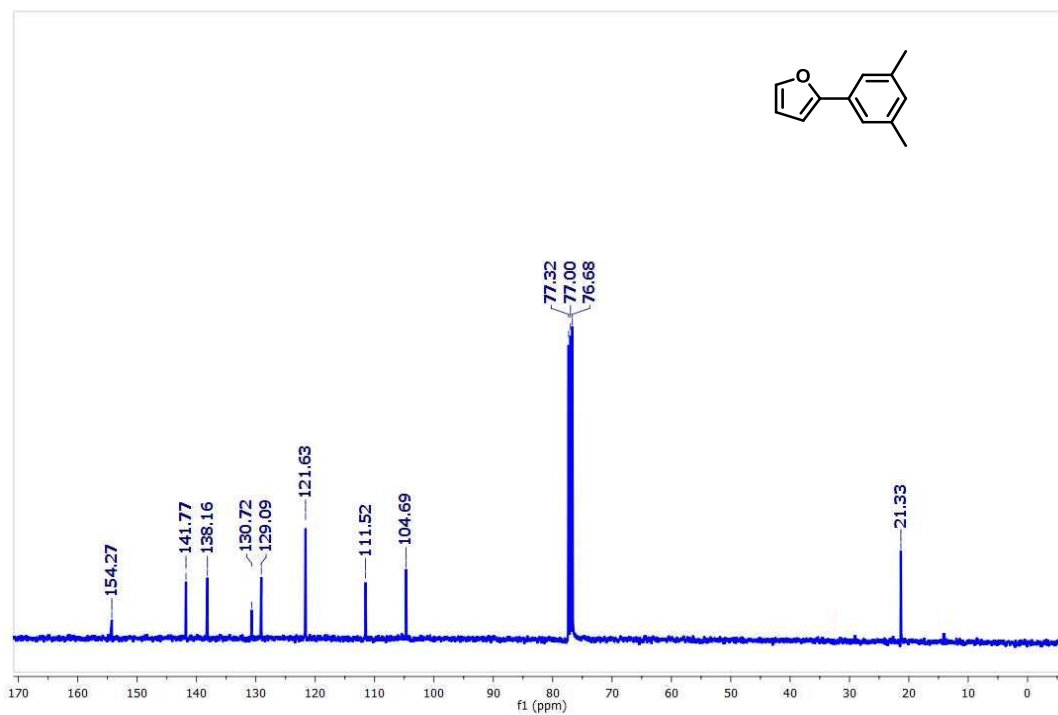

**Figure S57.**  $^{13}\text{C}$  NMR ( $\text{CDCl}_3$ ) spectrum of 2-(3,5-dimethylphenyl)furan (**5d**).



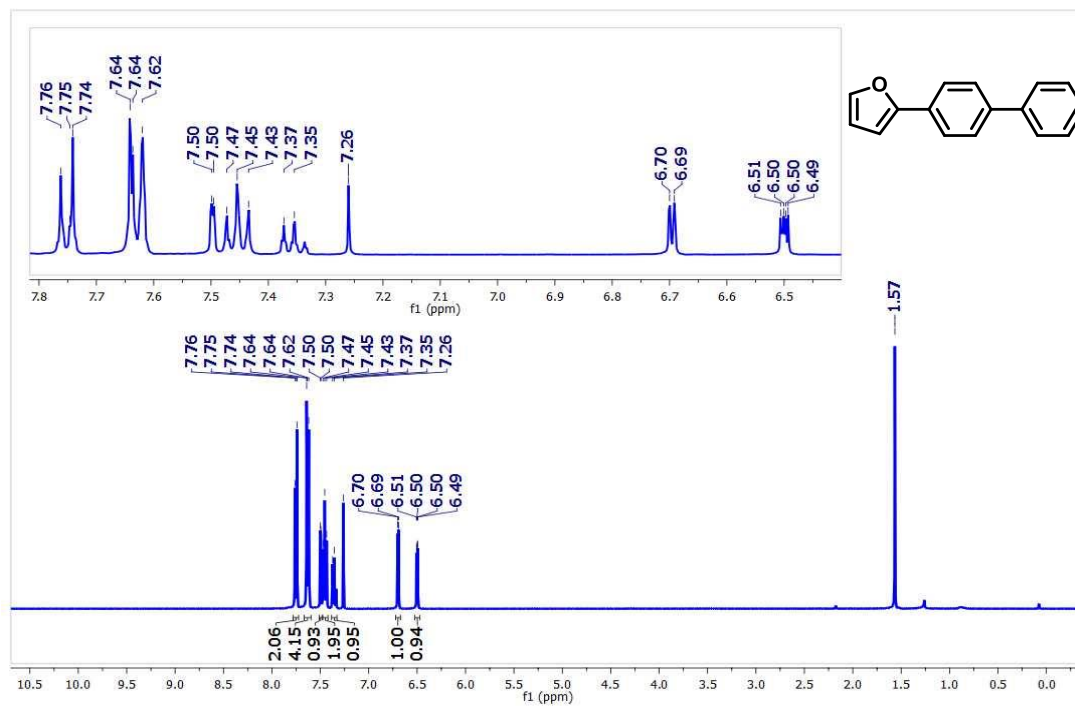

**Figure S58.** <sup>1</sup>H NMR (CDCl<sub>3</sub>) spectrum of 2-biphenylfuran (**5e**).

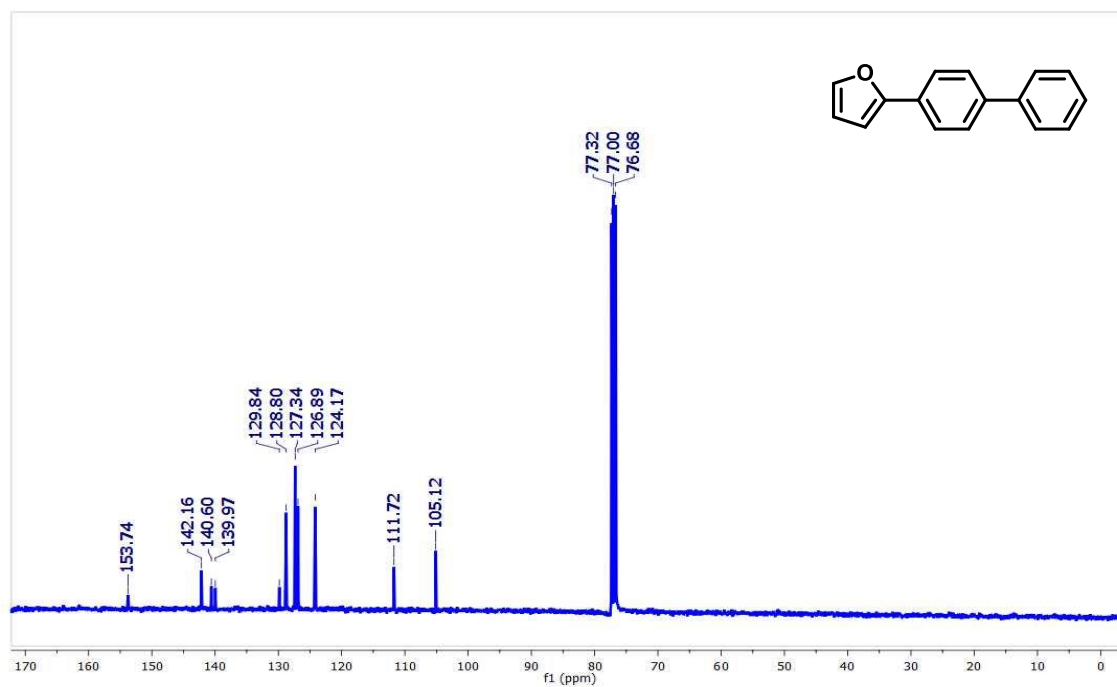

**Figure S59.** <sup>13</sup>C NMR (CDCl<sub>3</sub>) spectrum of 2-biphenylfuran (**5e**).

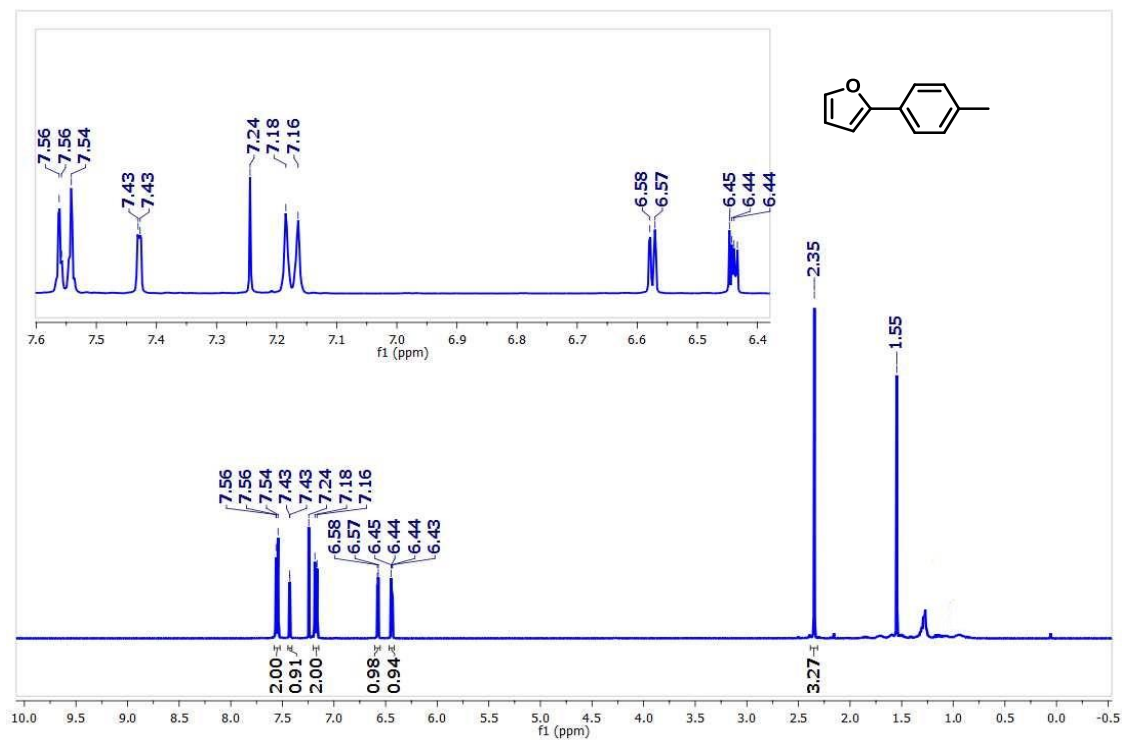

**Figure S60.** <sup>1</sup>H NMR (CDCl<sub>3</sub>) spectrum of 2-(4-methylphenyl)furan (**5f**).

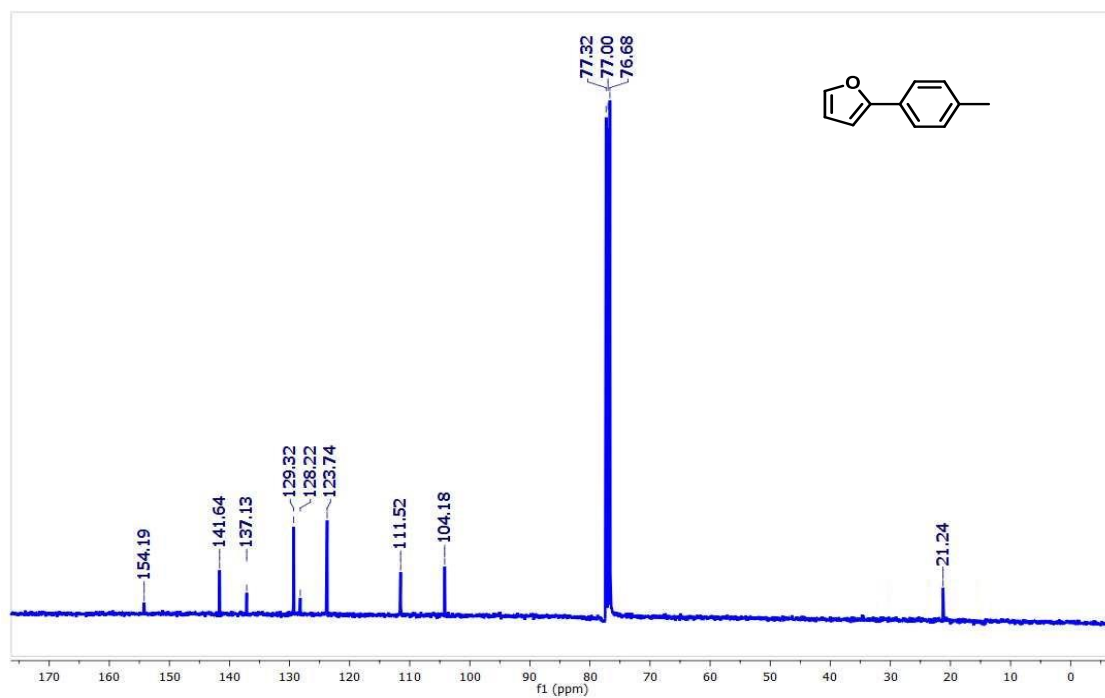

**Figure S61.** <sup>13</sup>C NMR (CDCl<sub>3</sub>) spectrum of 2-(4-methylphenyl)furan (**5f**).

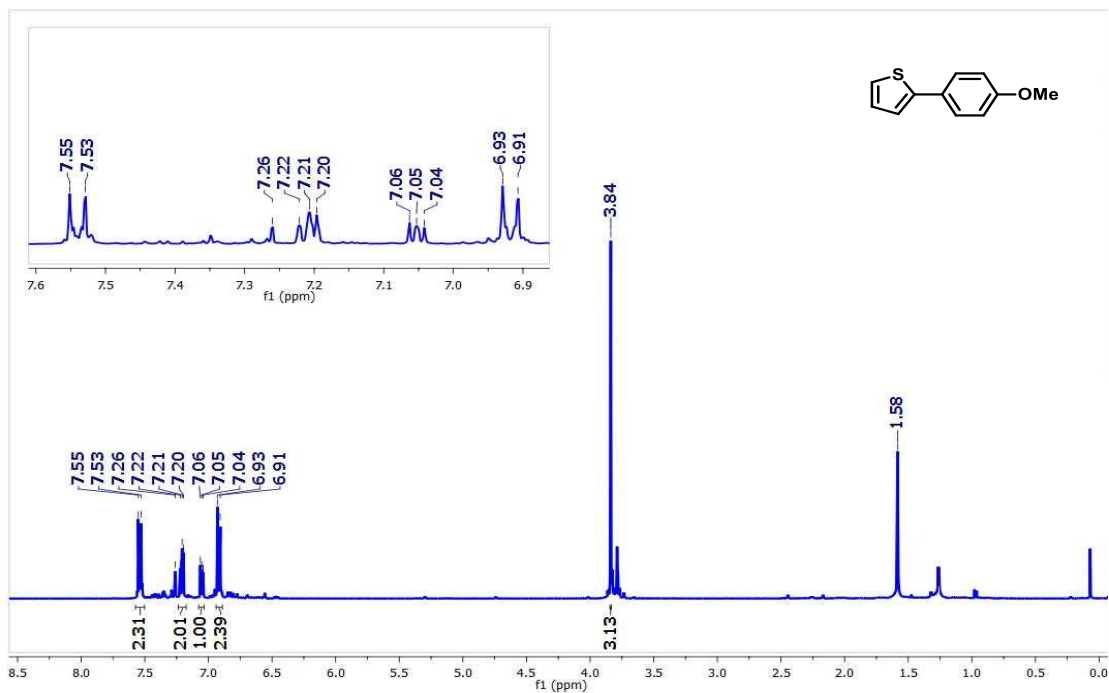

**Figure S62.**  $^1\text{H}$  NMR ( $\text{CDCl}_3$ ) spectrum of 2-(4-methoxyphenyl)thiophene (**6b**).

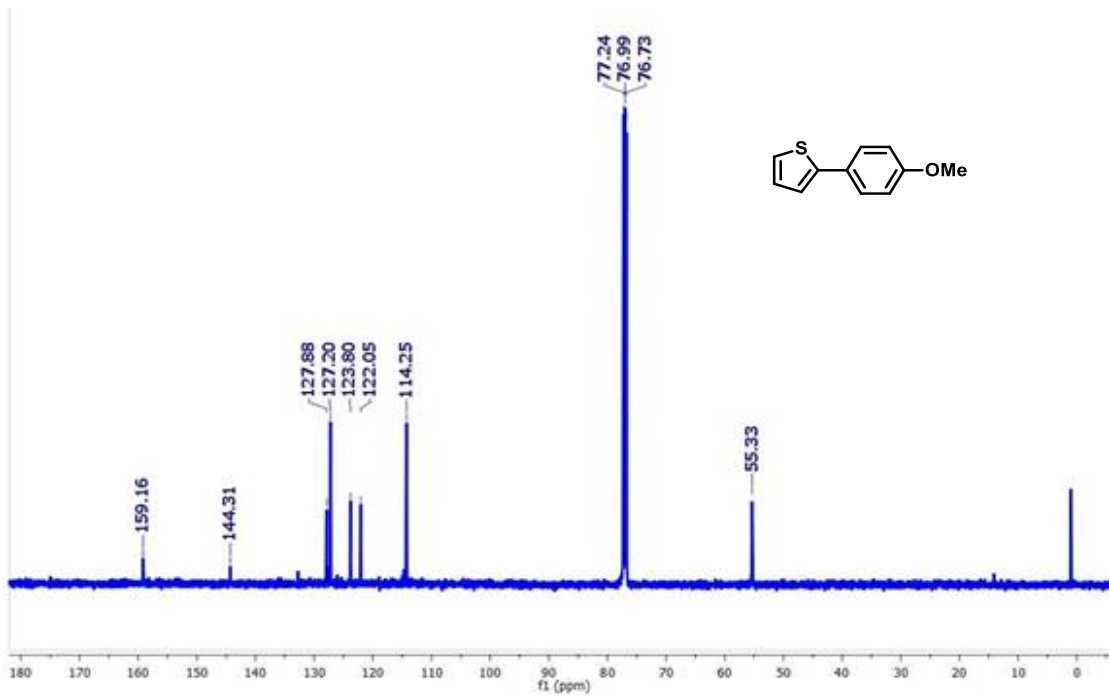

**Figure S63.**  $^{13}\text{C}$  NMR ( $\text{CDCl}_3$ ) spectrum of 2-(4-methoxyphenyl)thiophene (**6b**).

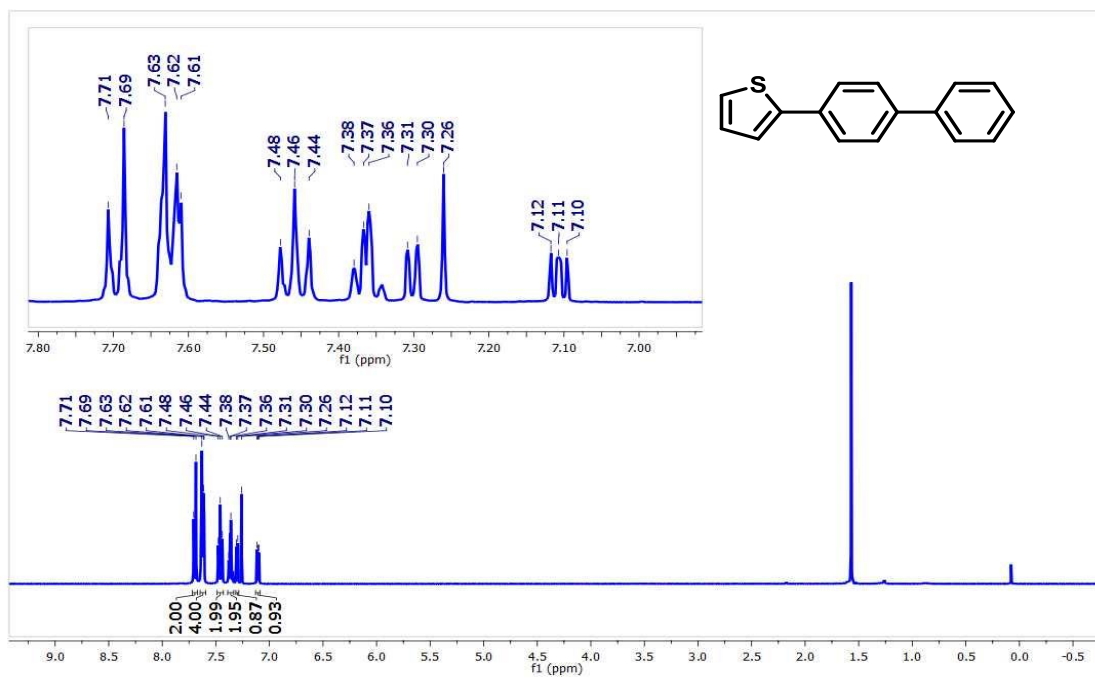

Figure S64. <sup>1</sup>H NMR (CDCl<sub>3</sub>) spectrum of 2-biphenylthiophene (6e).

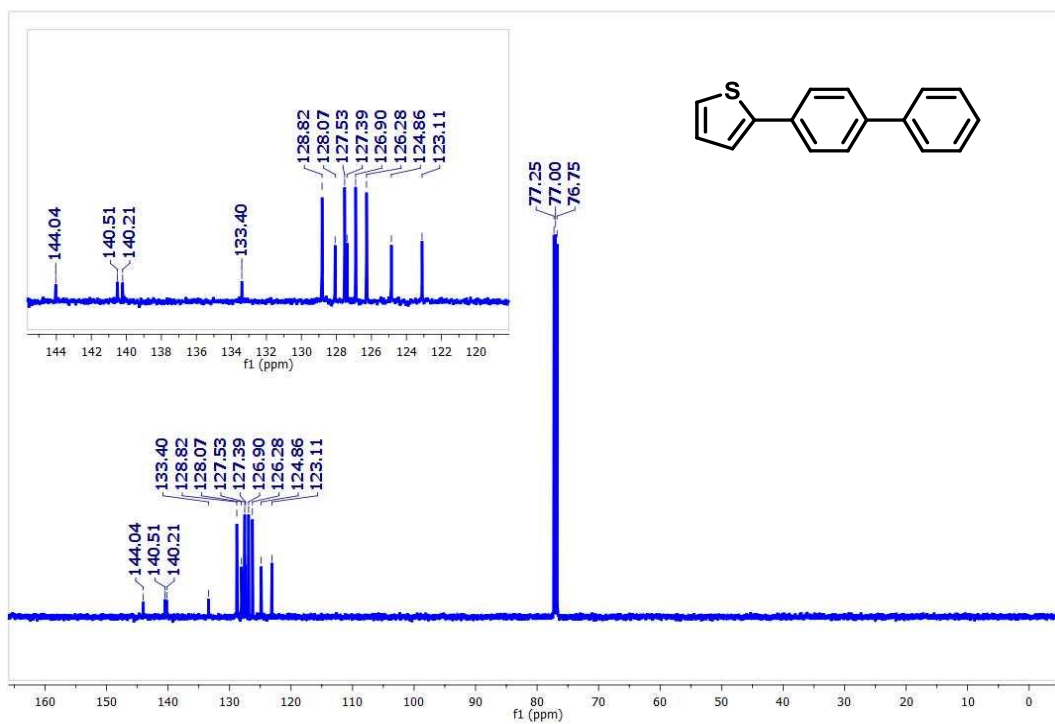

Figure S65. <sup>13</sup>C NMR (CDCl<sub>3</sub>) spectrum of 2-biphenylthiophene (6e).

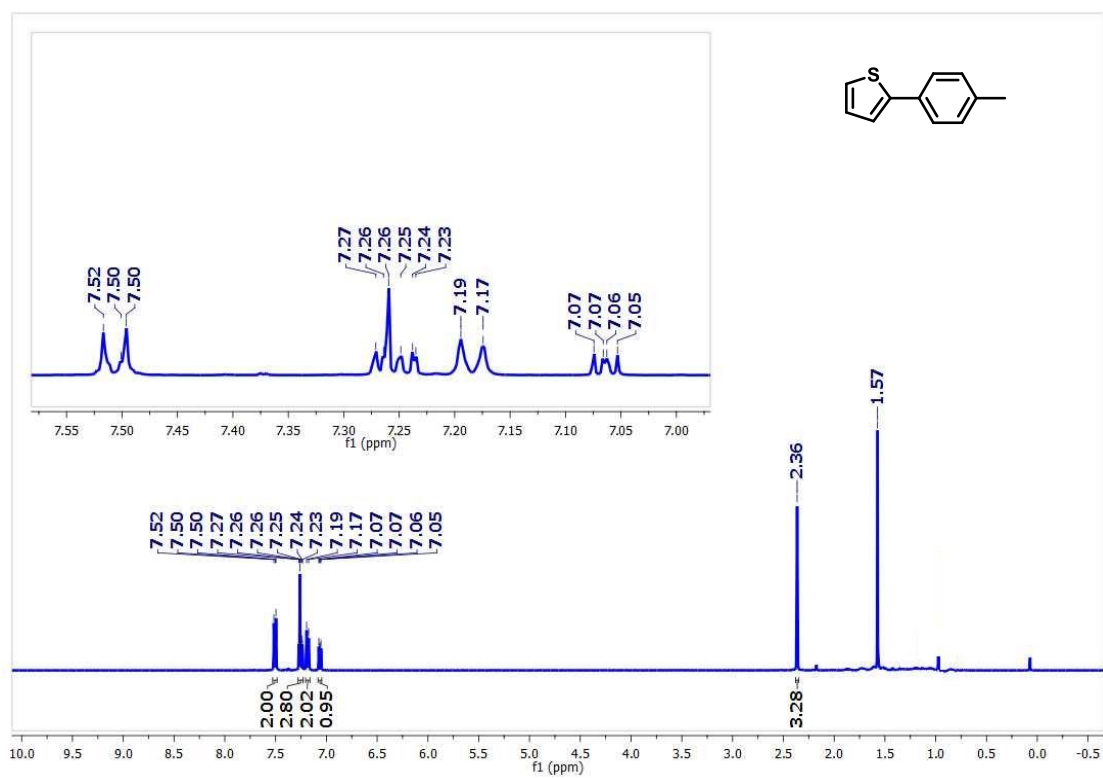

**Figure S66.** <sup>1</sup>H NMR (CDCl<sub>3</sub>) spectrum of 2-(4-methylphenyl)thiophene (**6f**).

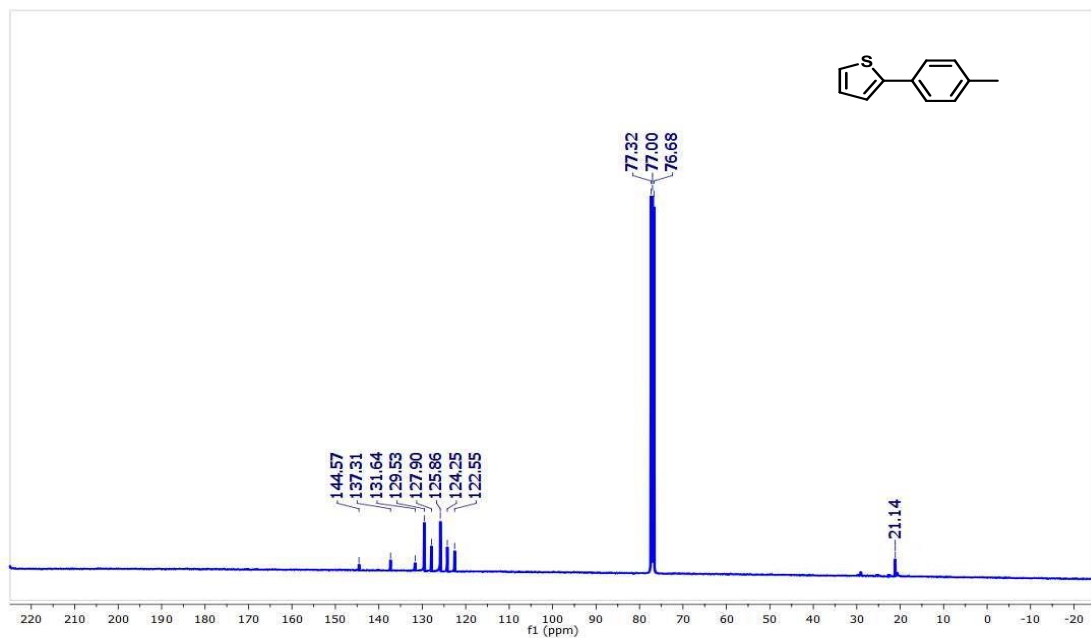

**Figure S67.** <sup>13</sup>C NMR (CDCl<sub>3</sub>) spectrum of 2-(4-methylphenyl)thiophene (**6f**).

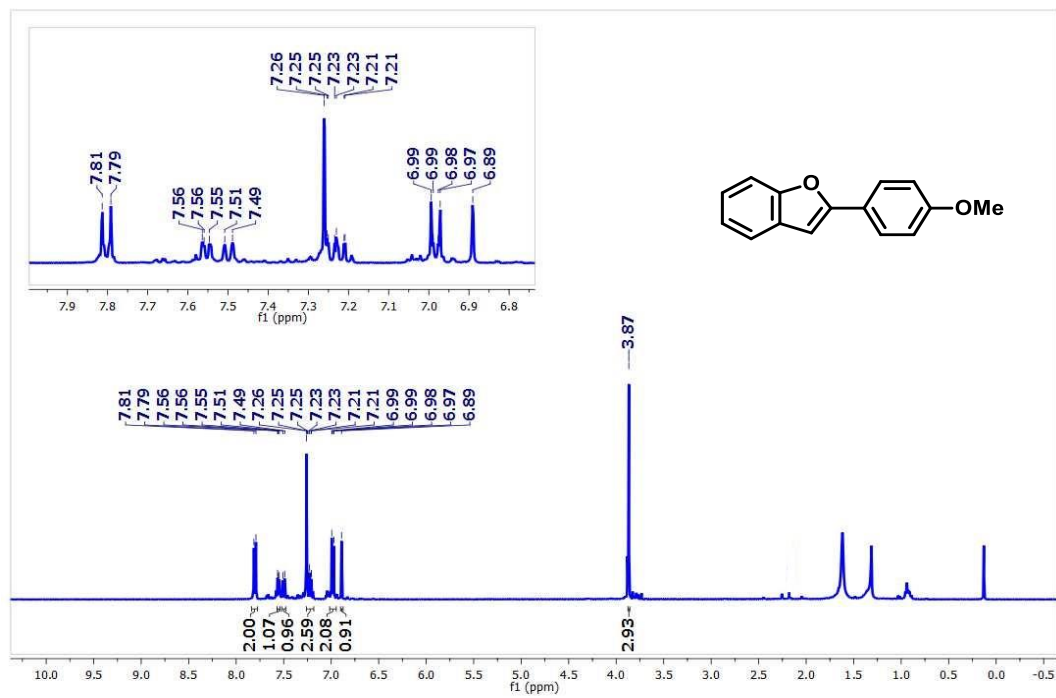

**Figure S68.**  $^1\text{H}$  NMR ( $\text{CDCl}_3$ ) spectrum of 4-(benzofuran-2-yl)anisole (**7b**).

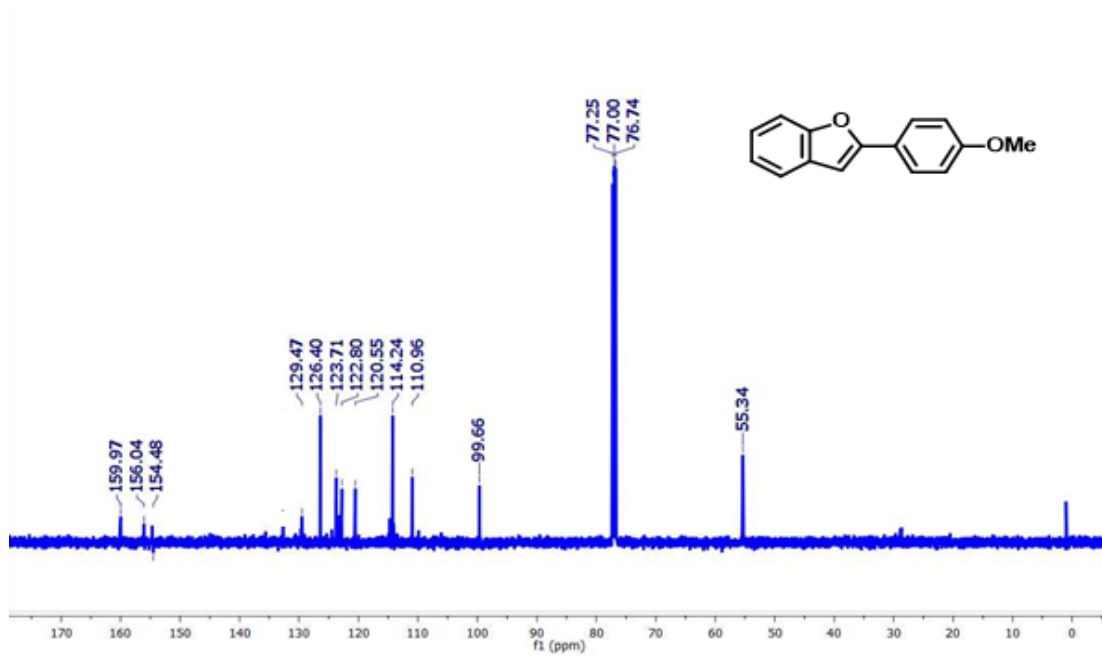

**Figure S69.**  $^{13}\text{C}$  NMR ( $\text{CDCl}_3$ ) spectrum of 4-(benzofuran-2-yl)anisole (**7b**).

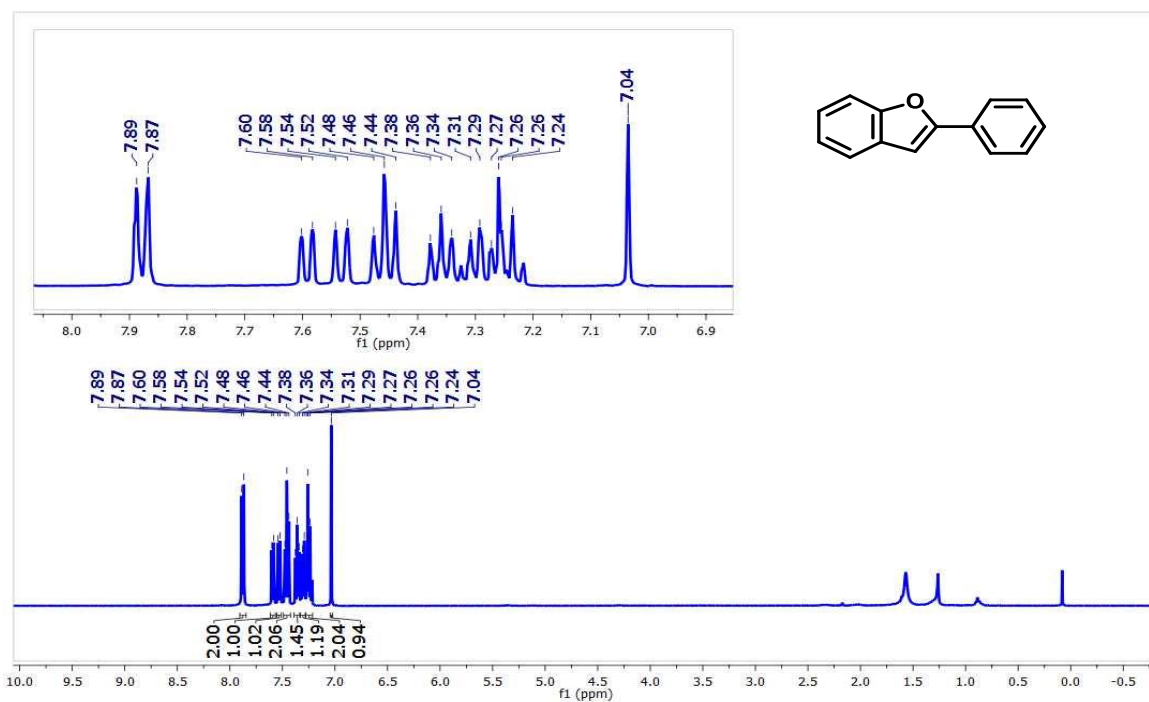

Figure S70. <sup>1</sup>H NMR (CDCl<sub>3</sub>) spectrum of 4-(benzofuran-2-yl)benzene (7c).

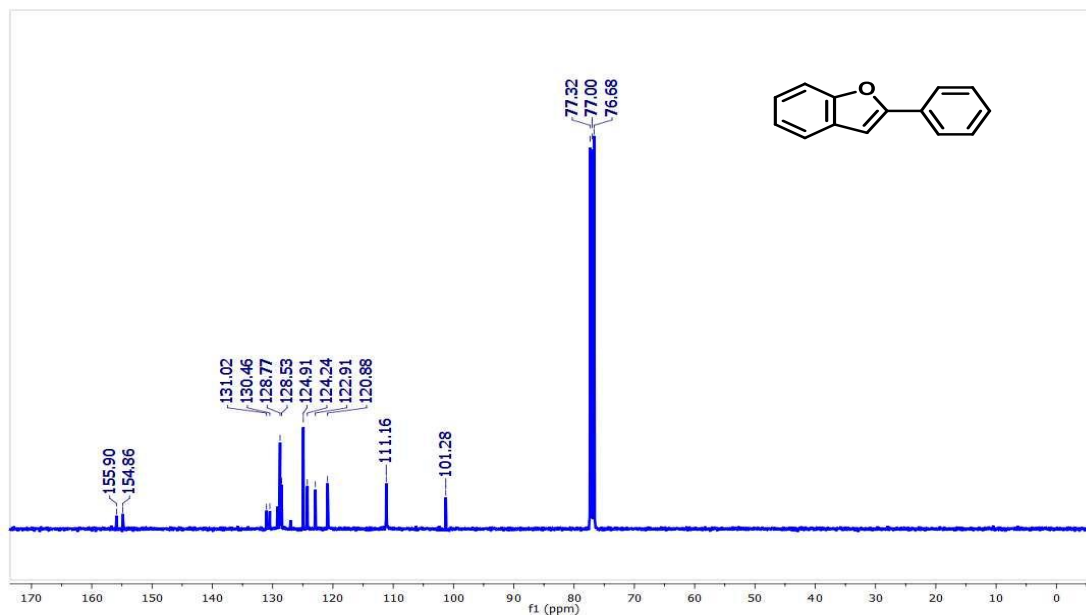

Figure S71. <sup>13</sup>C NMR (CDCl<sub>3</sub>) spectrum of 4-(benzofuran-2-yl)benzene (7c).

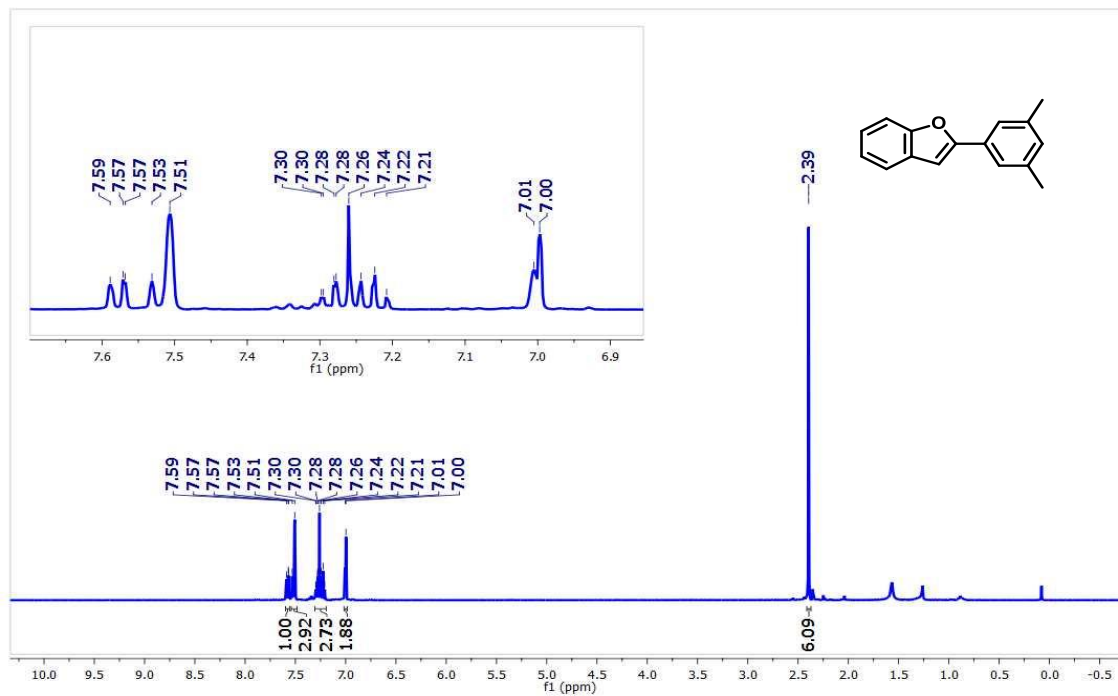

**Figure S72.** <sup>1</sup>H NMR (CDCl<sub>3</sub>) spectrum of 4-(benzofuran-2-yl)-3,5-dimethylbenzene (**7d**).

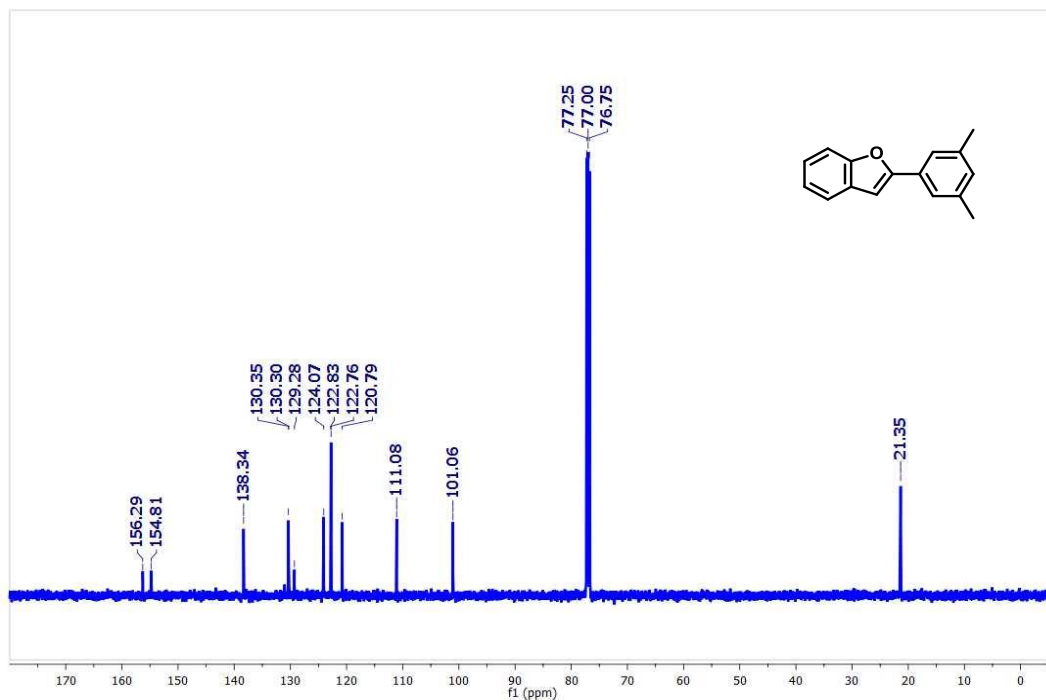

**Figure S73.** <sup>13</sup>C NMR (CDCl<sub>3</sub>) spectrum of 4-(benzofuran-2-yl)-3,5-dimethylbenzene (**7d**).



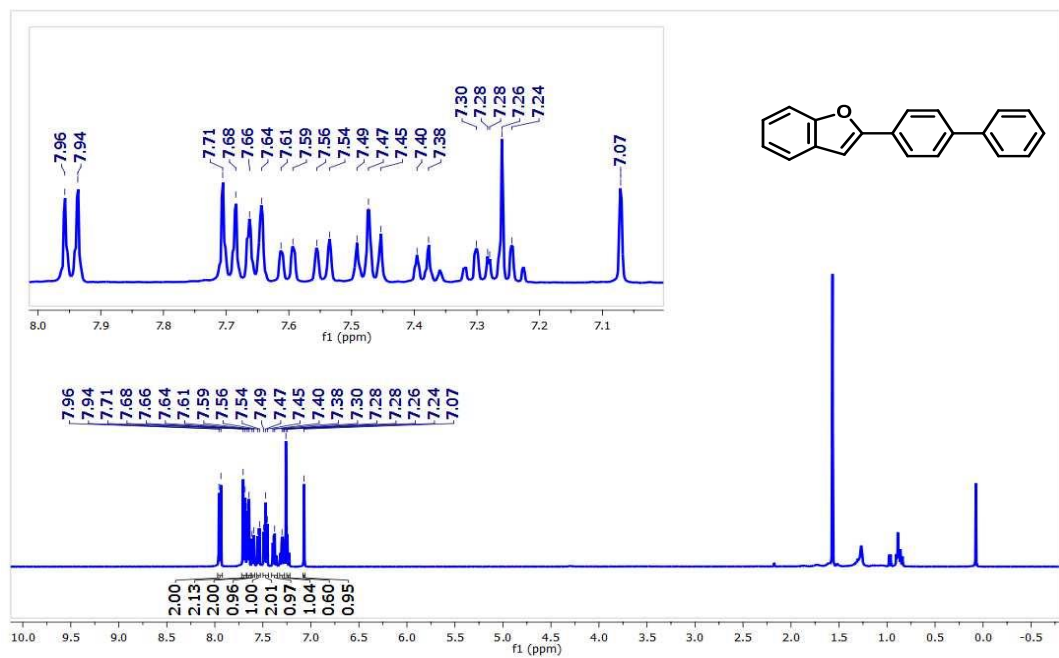

**Figure S74.**  $^1\text{H}$  NMR ( $\text{CDCl}_3$ ) spectrum of 4-(benzofuran-2-yl)biphenyl (**7e**).

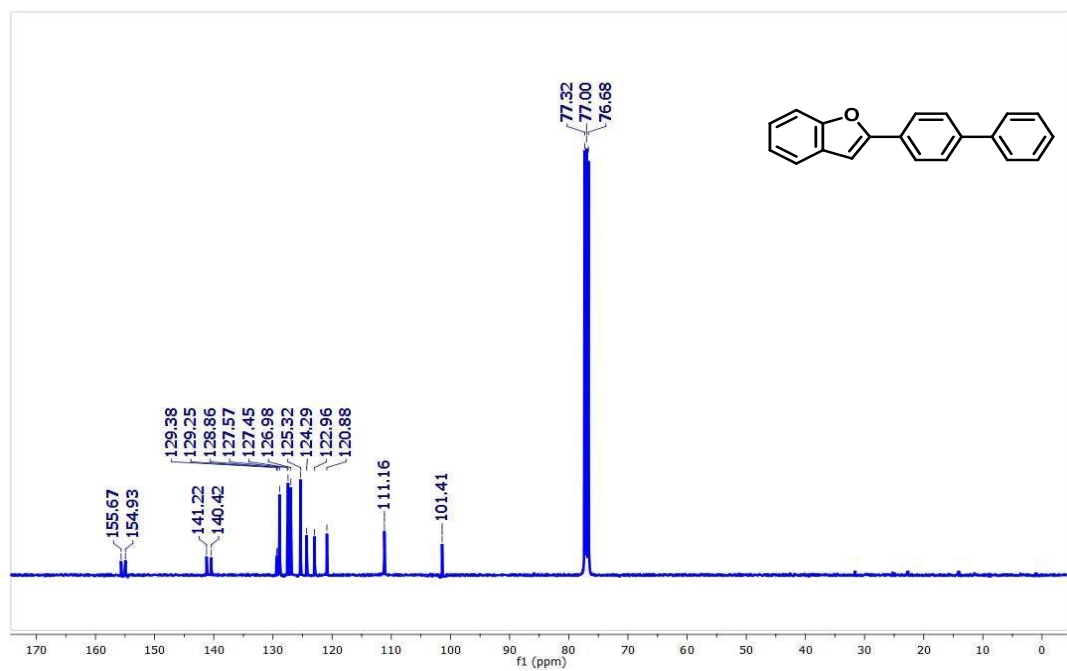

**Figure S75.**  $^{13}\text{C}$  NMR ( $\text{CDCl}_3$ ) spectrum of 4-(benzofuran-2-yl)biphenyl (**7e**).

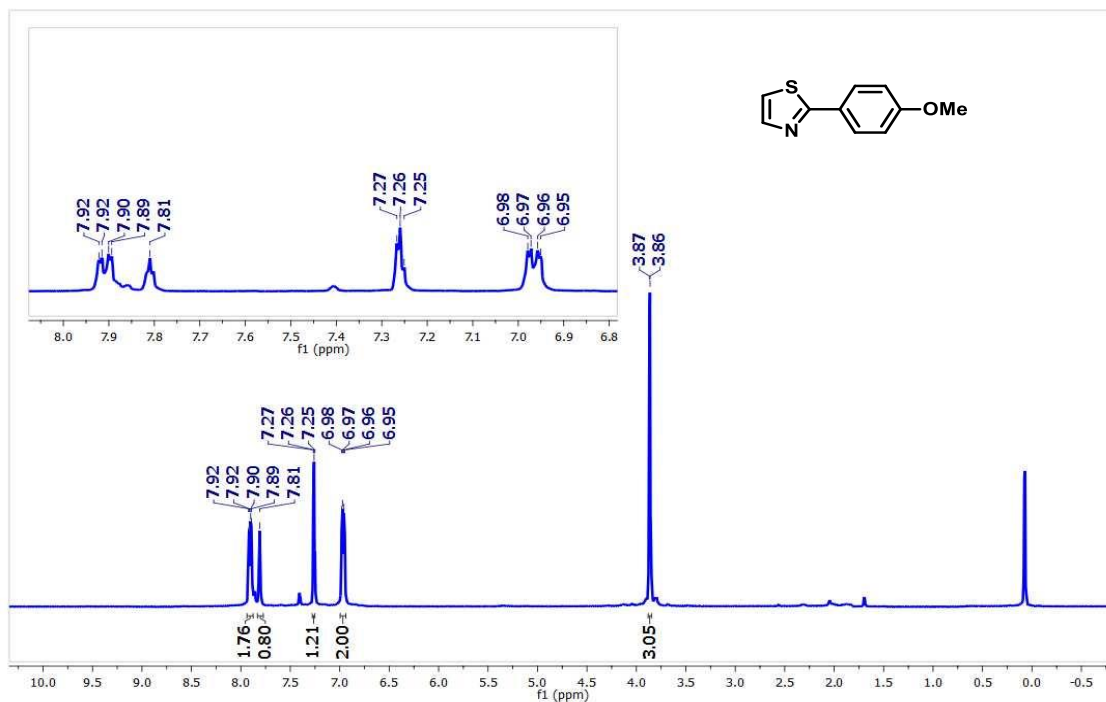

**Figure S76.** <sup>1</sup>H NMR (CDCl<sub>3</sub>) spectrum of 2-(4-methoxyphenyl)thiazole (**11b**).

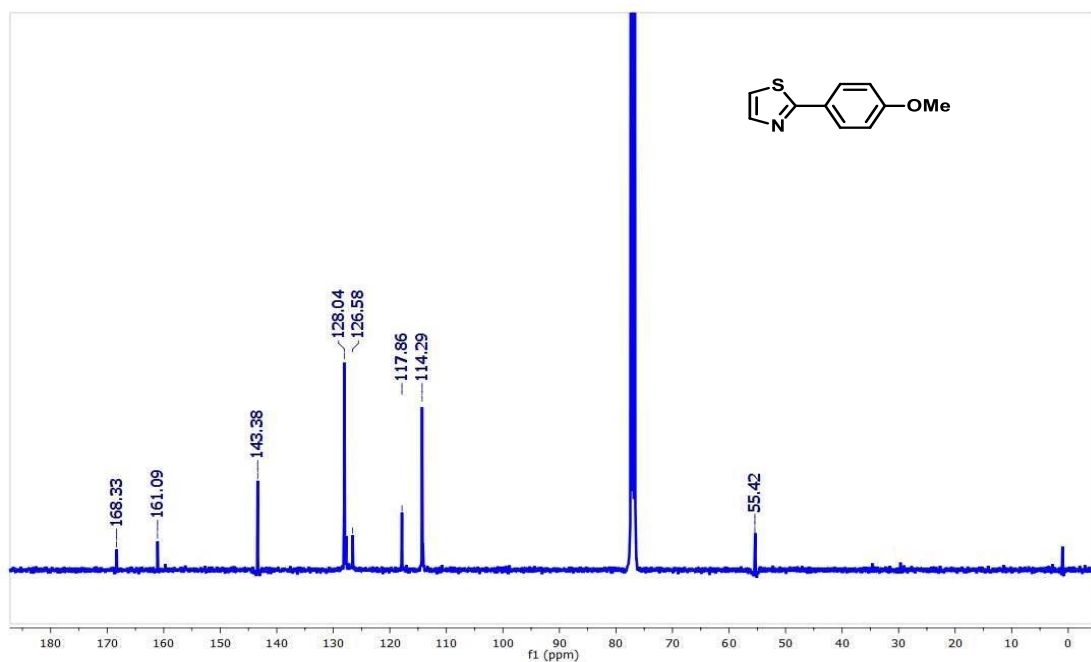

**Figure S77.** <sup>13</sup>C NMR (CDCl<sub>3</sub>) spectrum of 2-(4-methoxyphenyl)thiazole (**11b**).

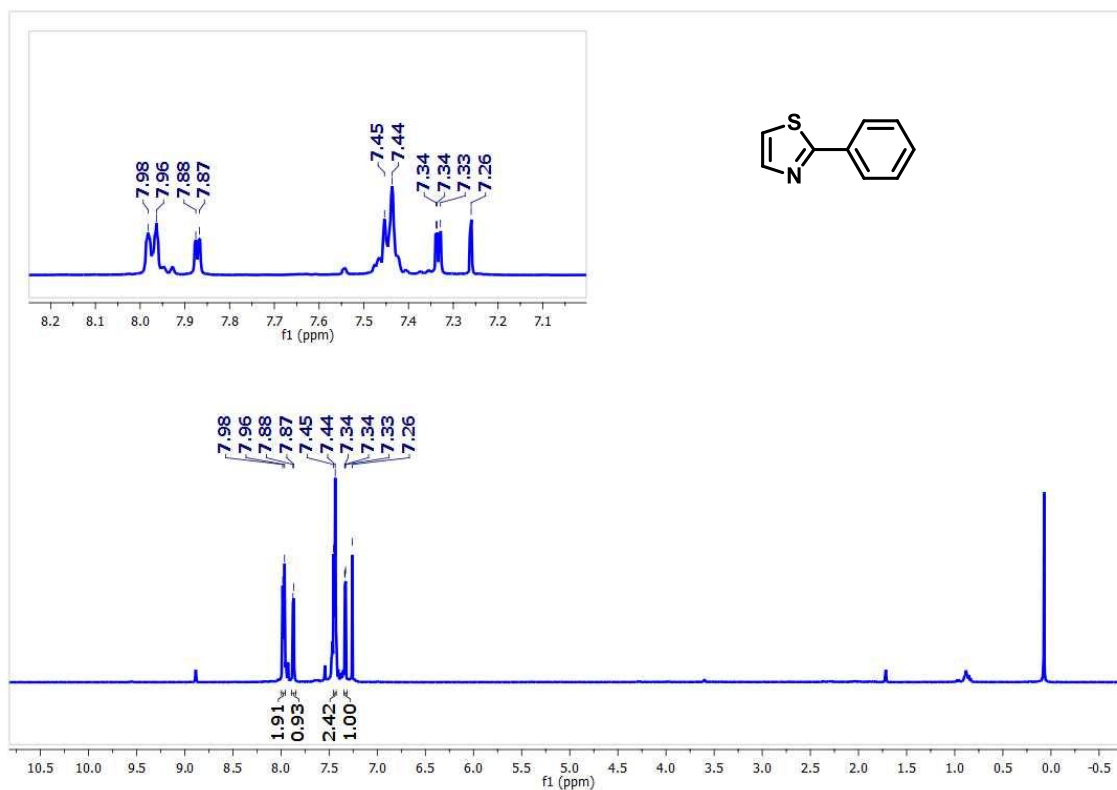

**Figure S78.** <sup>1</sup>H NMR (CDCl<sub>3</sub>) spectrum of 2-phenylthiazole (**11c**).

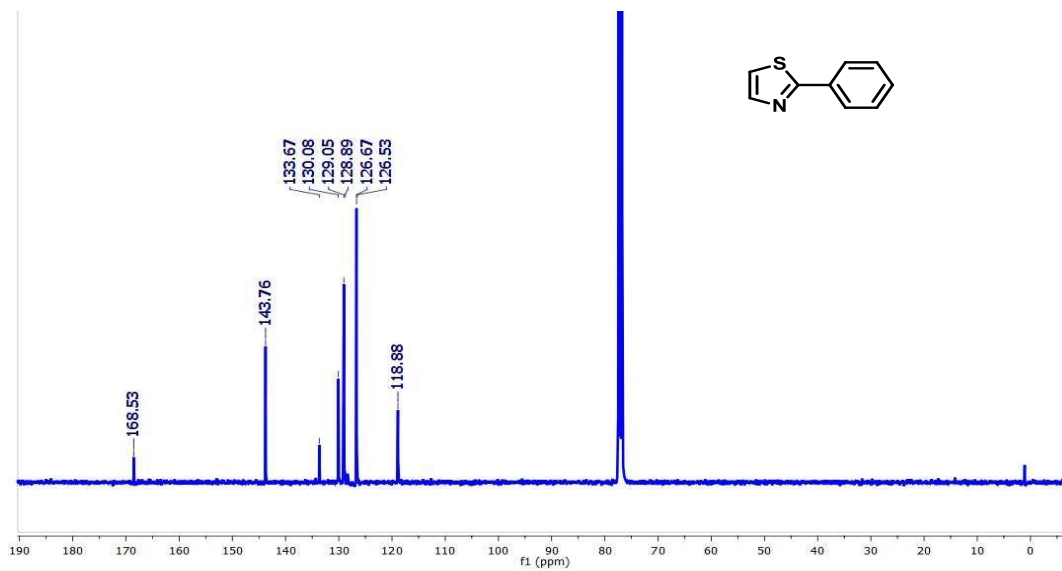

**Figure S79.** <sup>13</sup>C NMR (CDCl<sub>3</sub>) spectrum of 2-phenylthiazole (**11c**).

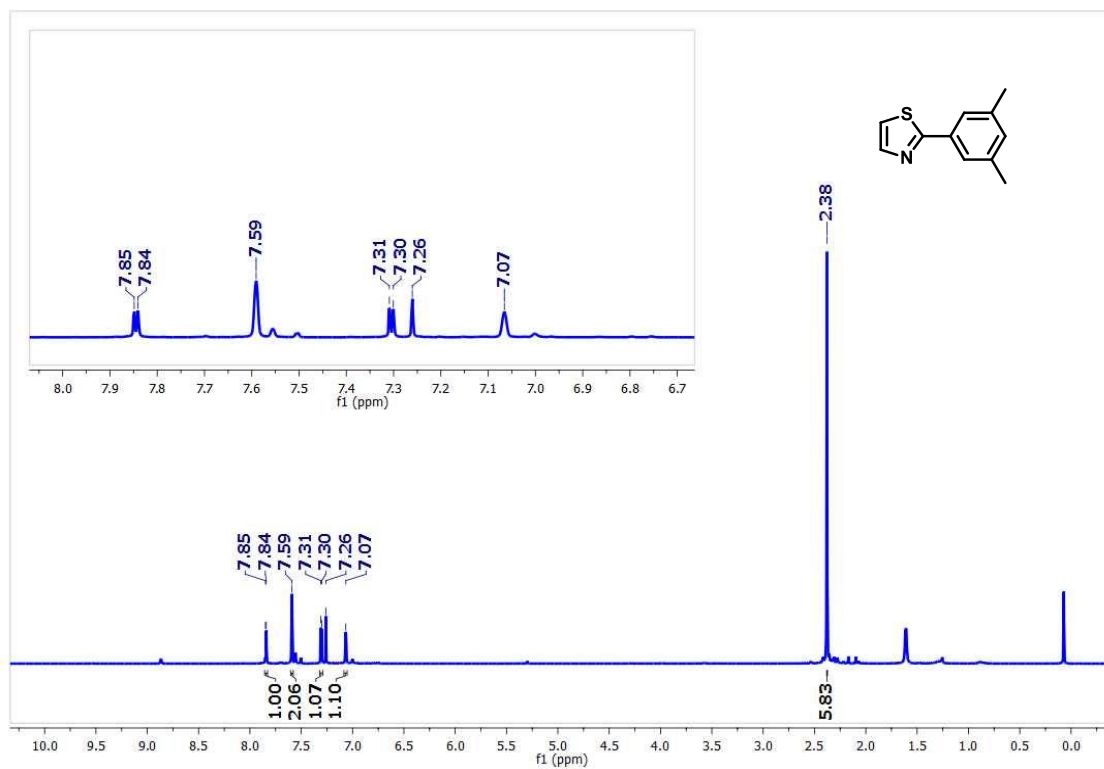

**Figure S80.** <sup>1</sup>H NMR (CDCl<sub>3</sub>) spectrum of 2-(3, 5-dimethylphenyl)thiazole (**11d**).

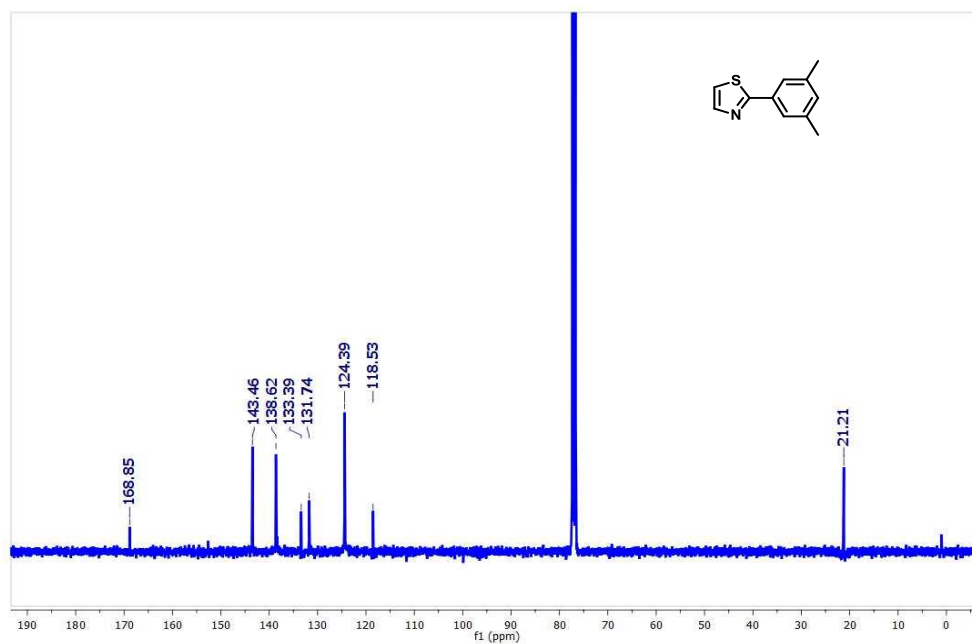

**Figure S81.** <sup>13</sup>C NMR (CDCl<sub>3</sub>) spectrum of 2-(3, 5-dimethylphenyl)thiazole (**11d**).

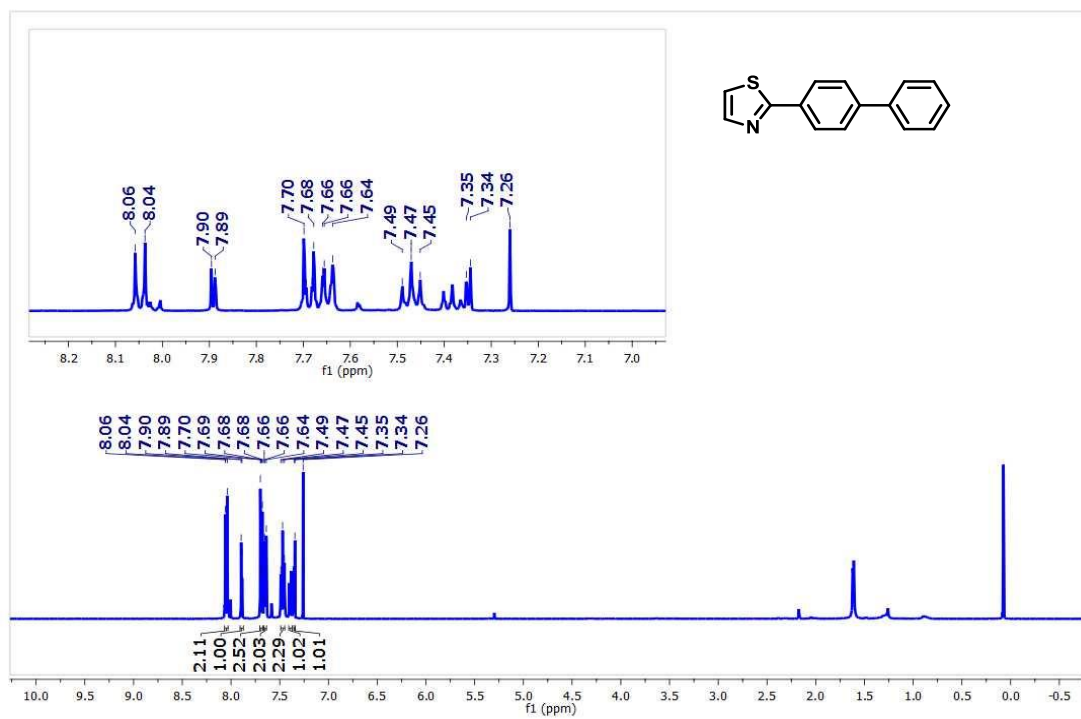

Figure S82. <sup>1</sup>H NMR (CDCl<sub>3</sub>) spectrum of 2-biphenylthiazole (**11e**).

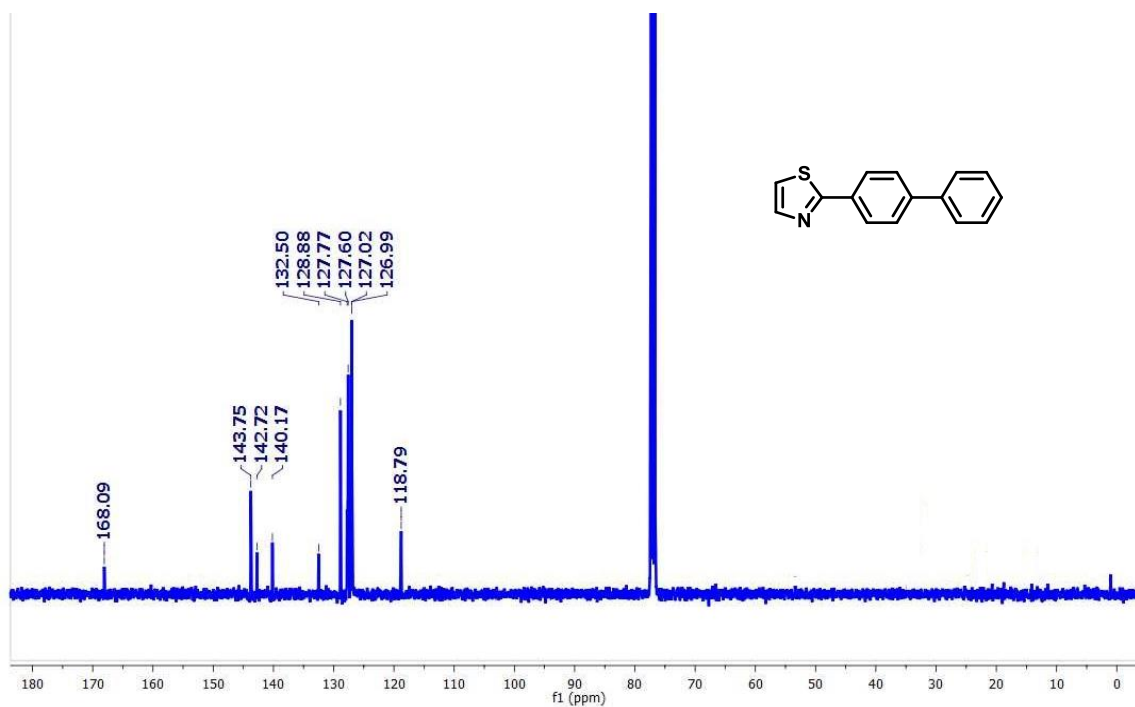

Figure S83. <sup>13</sup>C NMR (CDCl<sub>3</sub>) spectrum of 2-biphenylthiazole (**11e**).

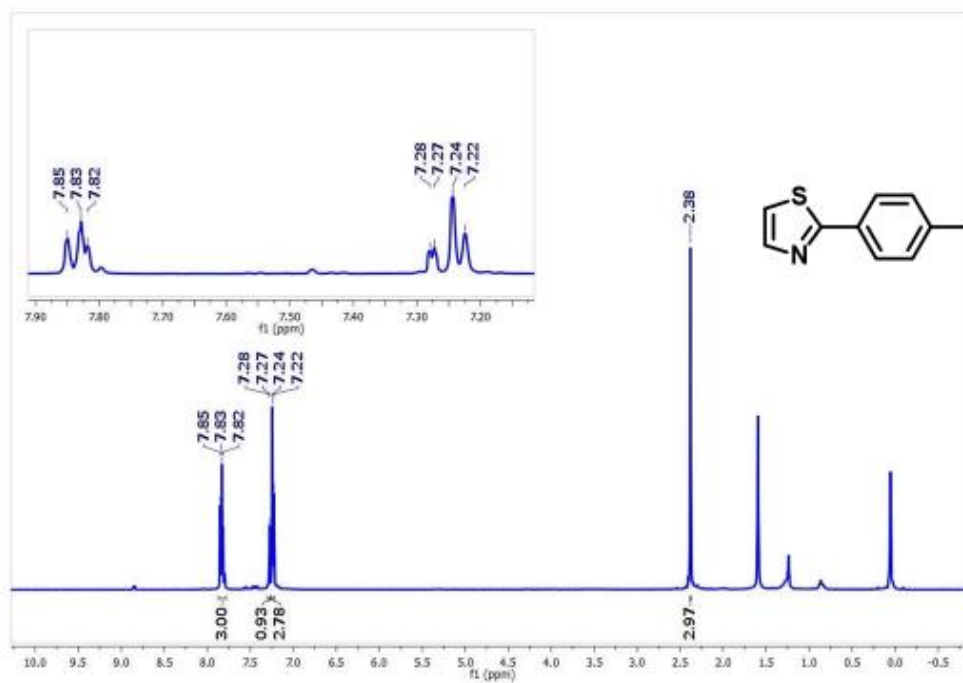

**Figure S84.**  $^1\text{H}$  NMR ( $\text{CDCl}_3$ ) spectrum of 2-(4-methylphenyl)thiazole (**11f**).

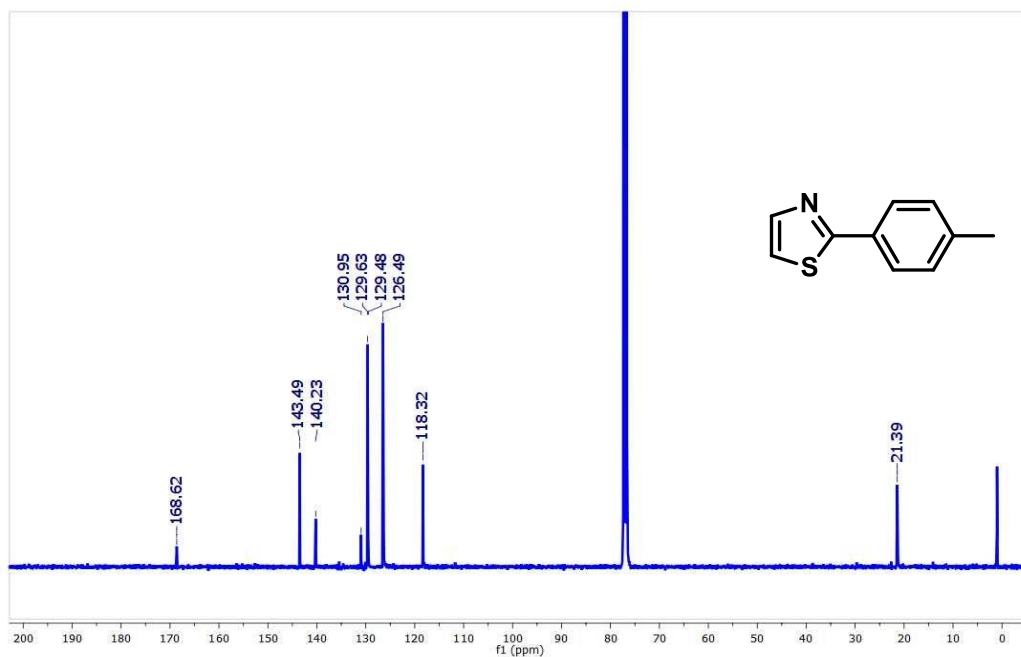

**Figure S85.**  $^{13}\text{C}$  NMR ( $\text{CDCl}_3$ ) spectrum of 2-(4-methylphenyl)thiazole (**11f**).

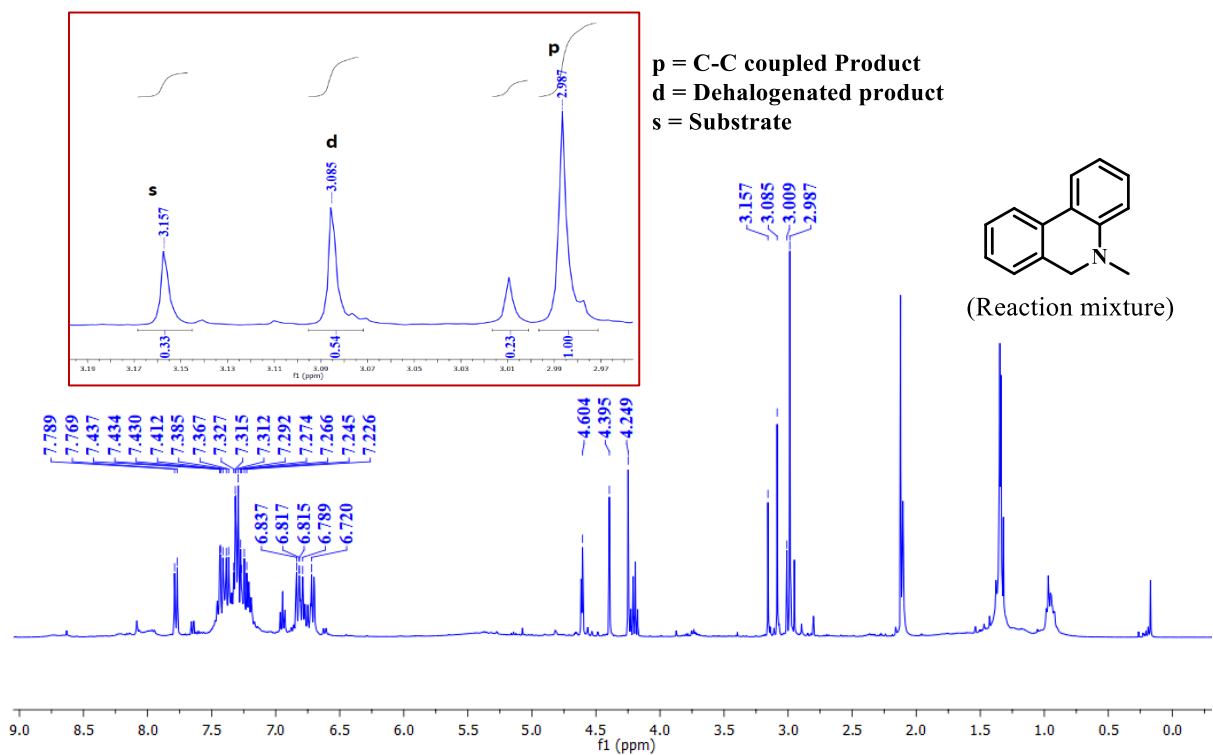

**Figure S86.** Reaction mixture  $^1\text{H}$  NMR ( $\text{CDCl}_3$ ) spectrum of 5-methyl-5,6-dihydrophenanthridine (**12a**).

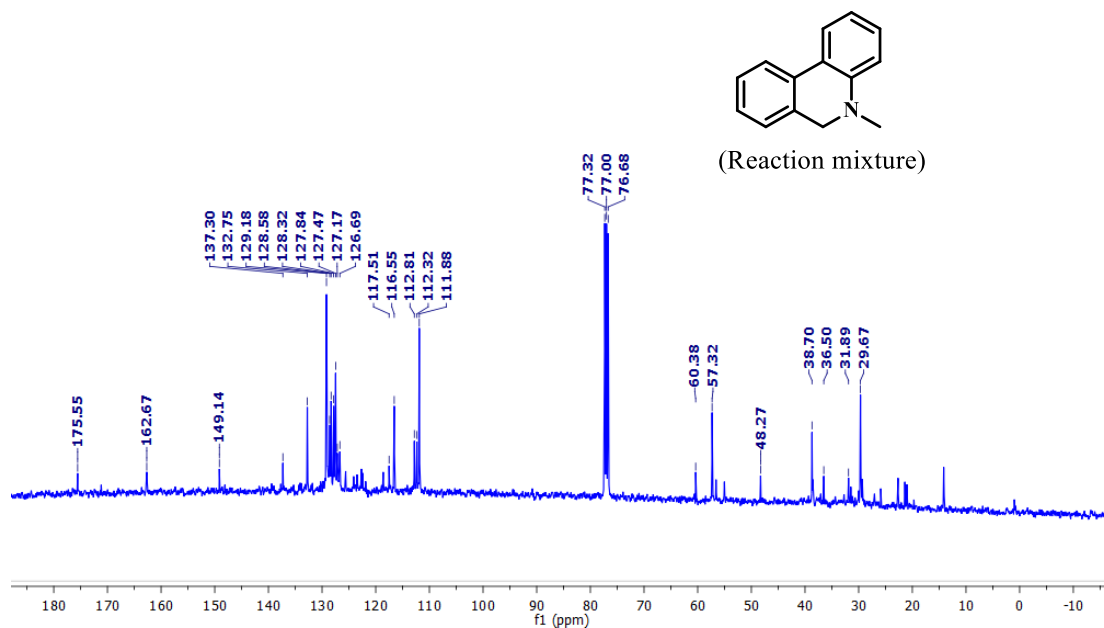

**Figure S87.** Reaction mixture  $^{13}\text{C}$  NMR ( $\text{CDCl}_3$ ) spectrum of 5-methyl-5,6-dihydrophenanthridine (**12a**).





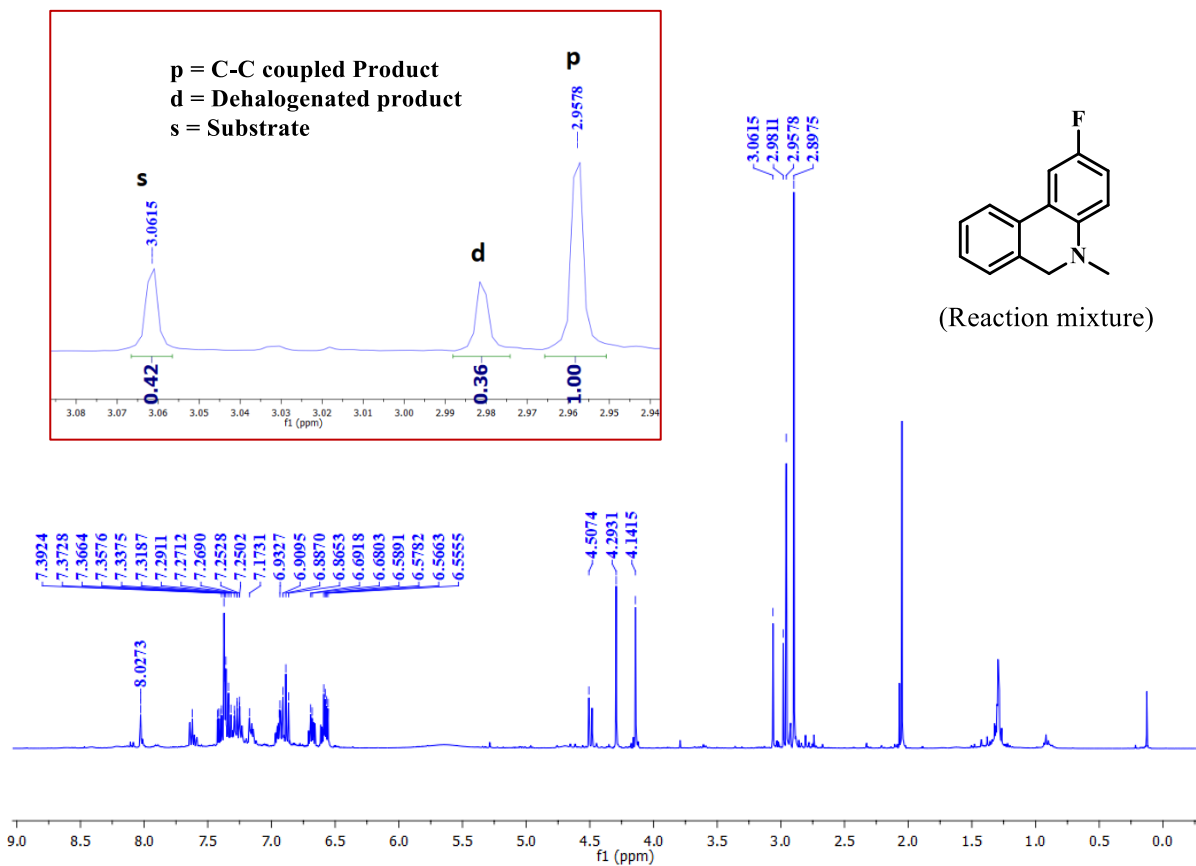

**Figure S90.** Reaction mixture <sup>1</sup>H NMR (CDCl<sub>3</sub>) spectrum of 2-fluoro-5-methyl-5,6-dihydrophenanthridine (**12c**).

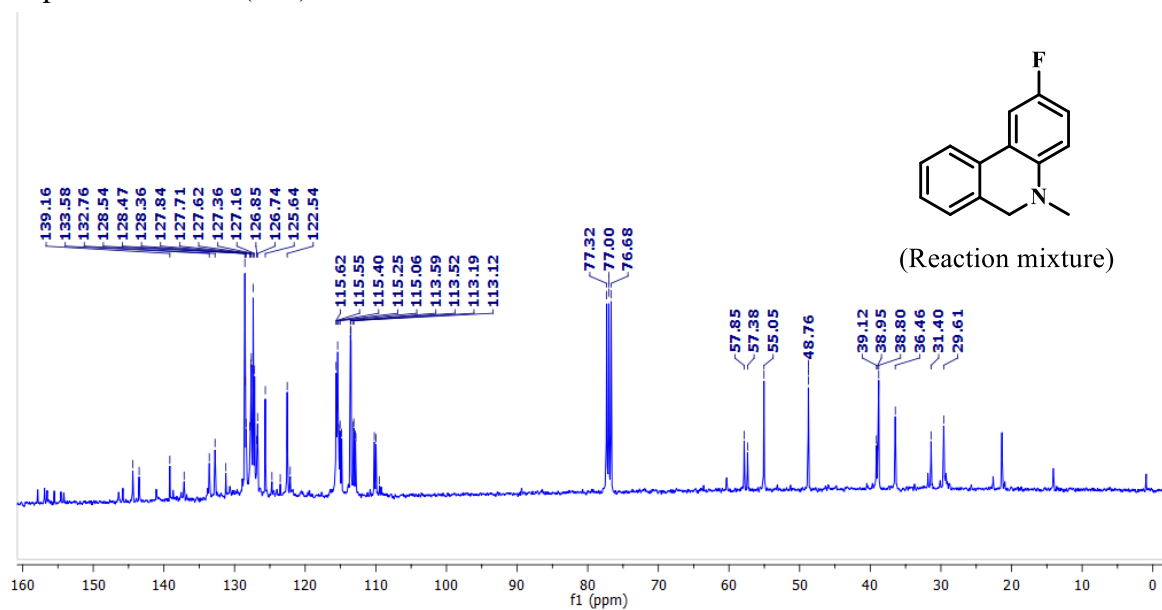

**Figure S91.** Reaction mixture <sup>13</sup>C NMR (CDCl<sub>3</sub>) spectrum of 2-fluoro-5-methyl-5,6-dihydrophenanthridine (**12c**).

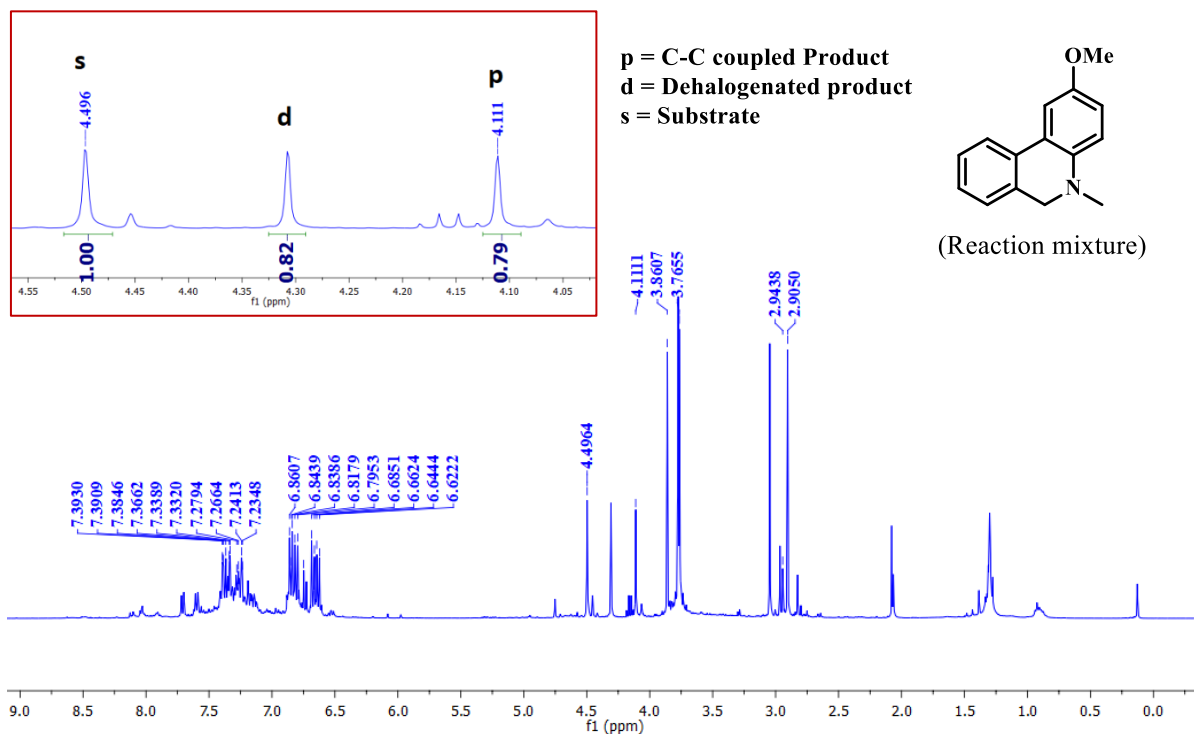

**Figure S92.** Reaction mixture <sup>1</sup>H NMR (CDCl<sub>3</sub>) spectrum of 2-methoxy-5-methyl-5,6-dihydrophenanthridine (**12d**).

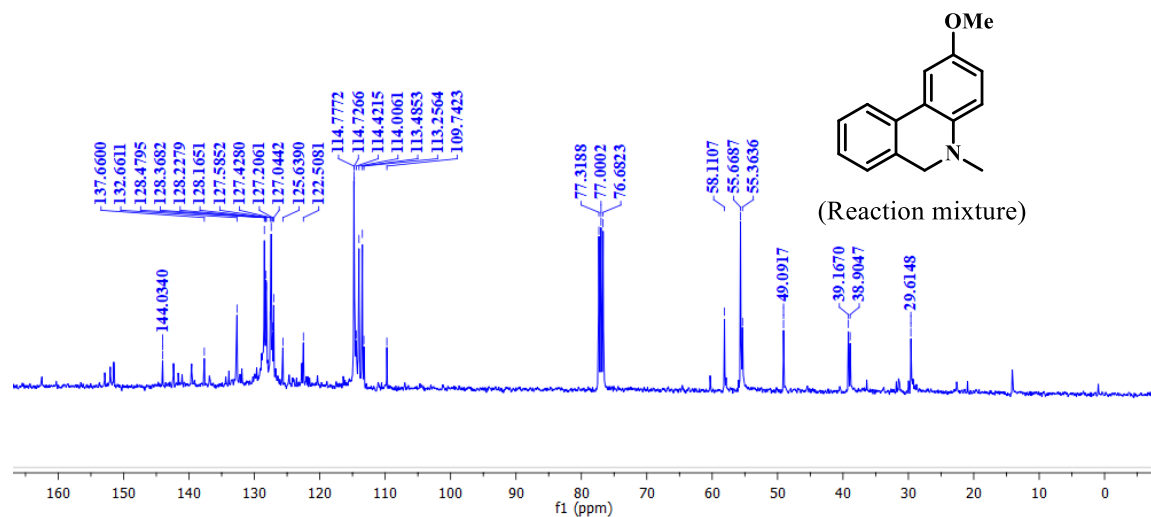

**Figure S93.** Reaction mixture <sup>13</sup>C NMR (CDCl<sub>3</sub>) spectrum of 2-methoxy-5-methyl-5,6-dihydrophenanthridine (**12d**).

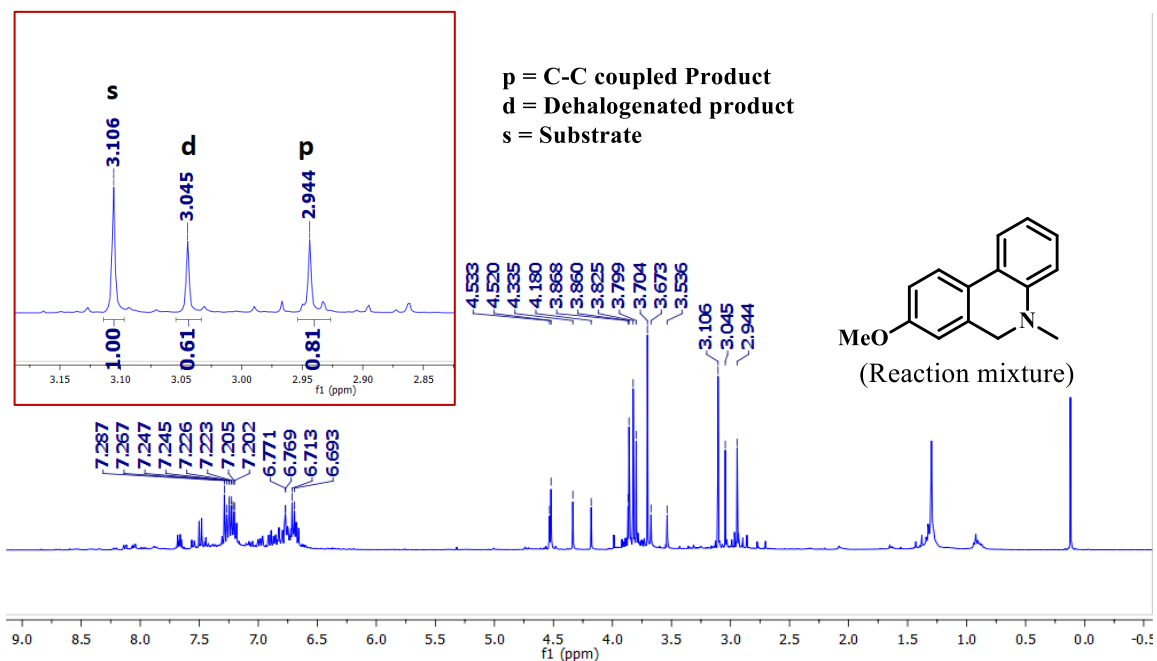

**Figure S94.** Reaction mixture  $^1\text{H}$  NMR ( $\text{CDCl}_3$ ) spectrum of 8-methoxy-5-methyl-5,6-dihydrophenanthridine (**12e**).

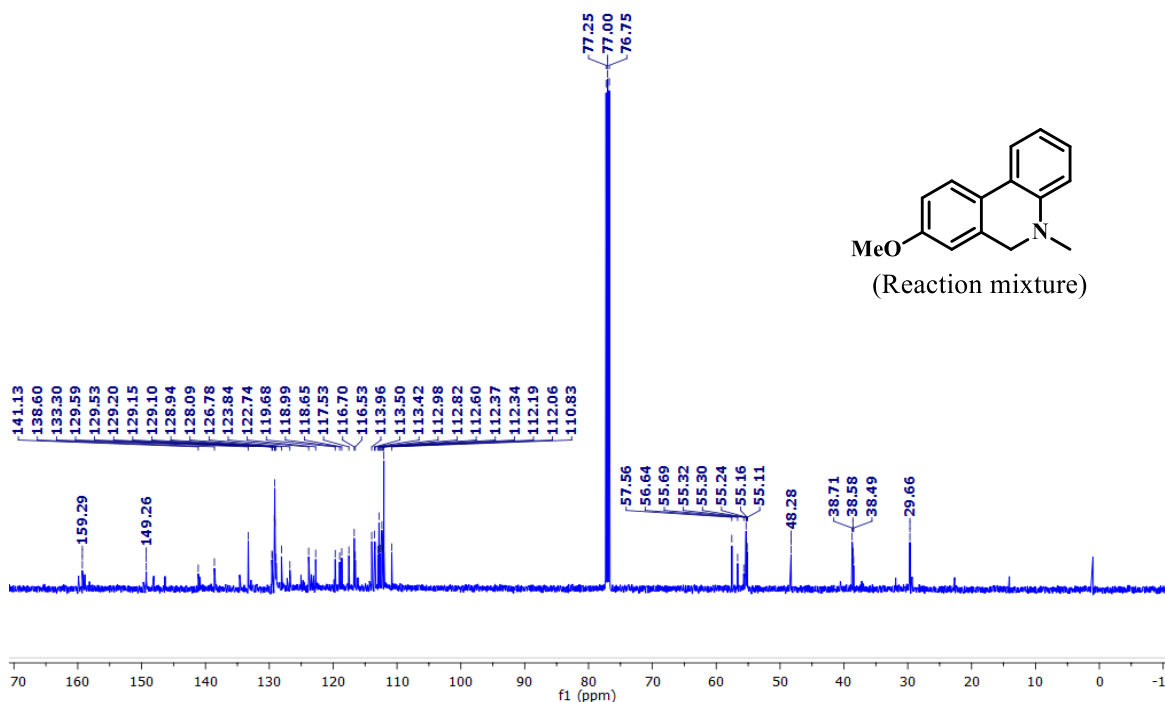

**Figure S95.** Reaction mixture  $^{13}\text{C}$  NMR ( $\text{CDCl}_3$ ) spectrum of 8-methoxy-5-methyl-5,6-dihydrophenanthridine (**12e**).

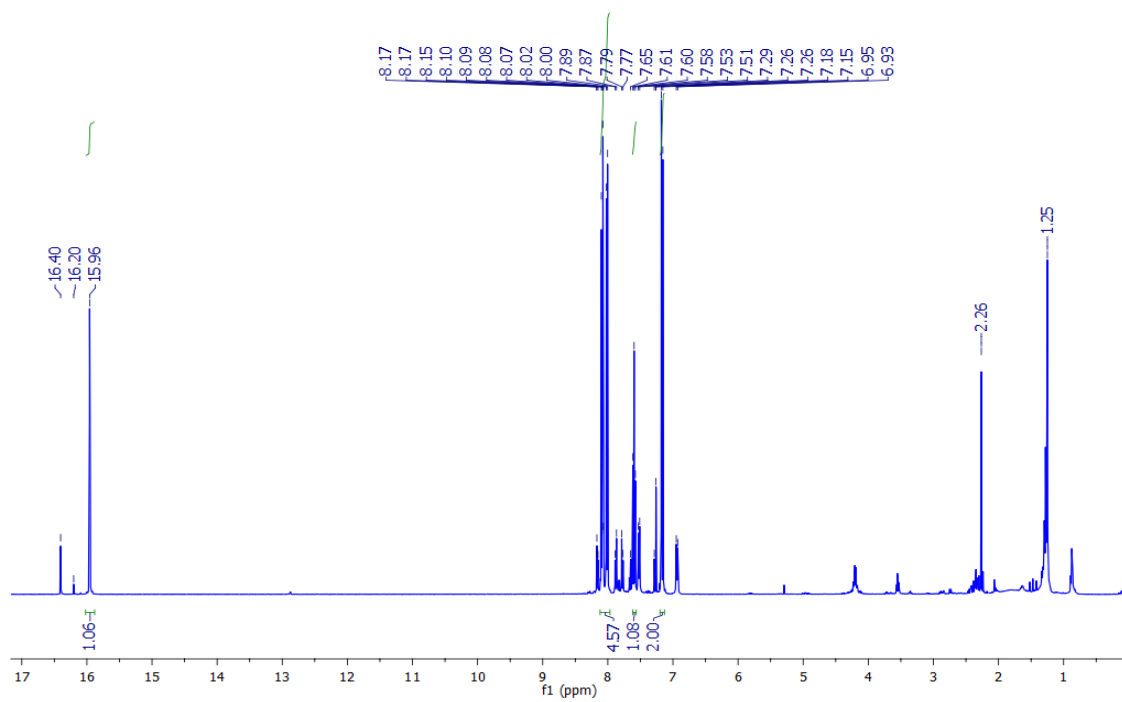

**Figure S96.**  $^1\text{H}$  NMR ( $\text{CDCl}_3$ ) spectrum of the phenalenyl parts, obtained after column chromatography of the catalytic reaction mixture.

### 23. Mass spectra:

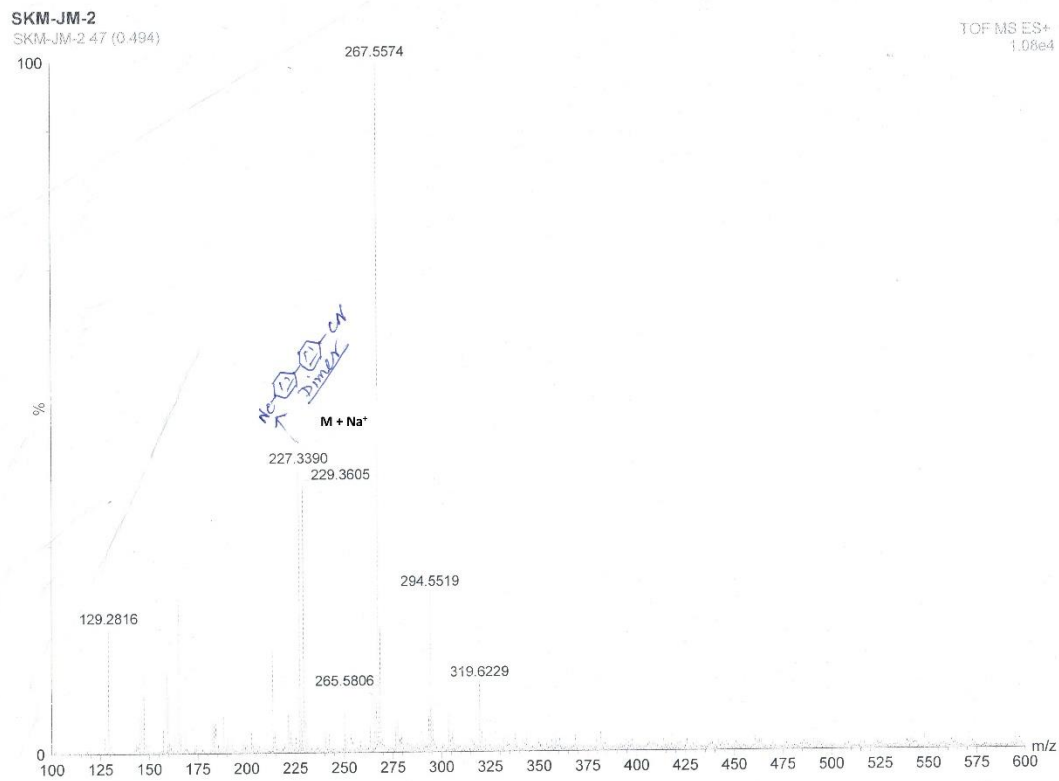

**Figure S97.** Mass spectrum of reaction mixture for the chlorobenzonitrile by doubly-reduced PLY(O,O)-K complex.

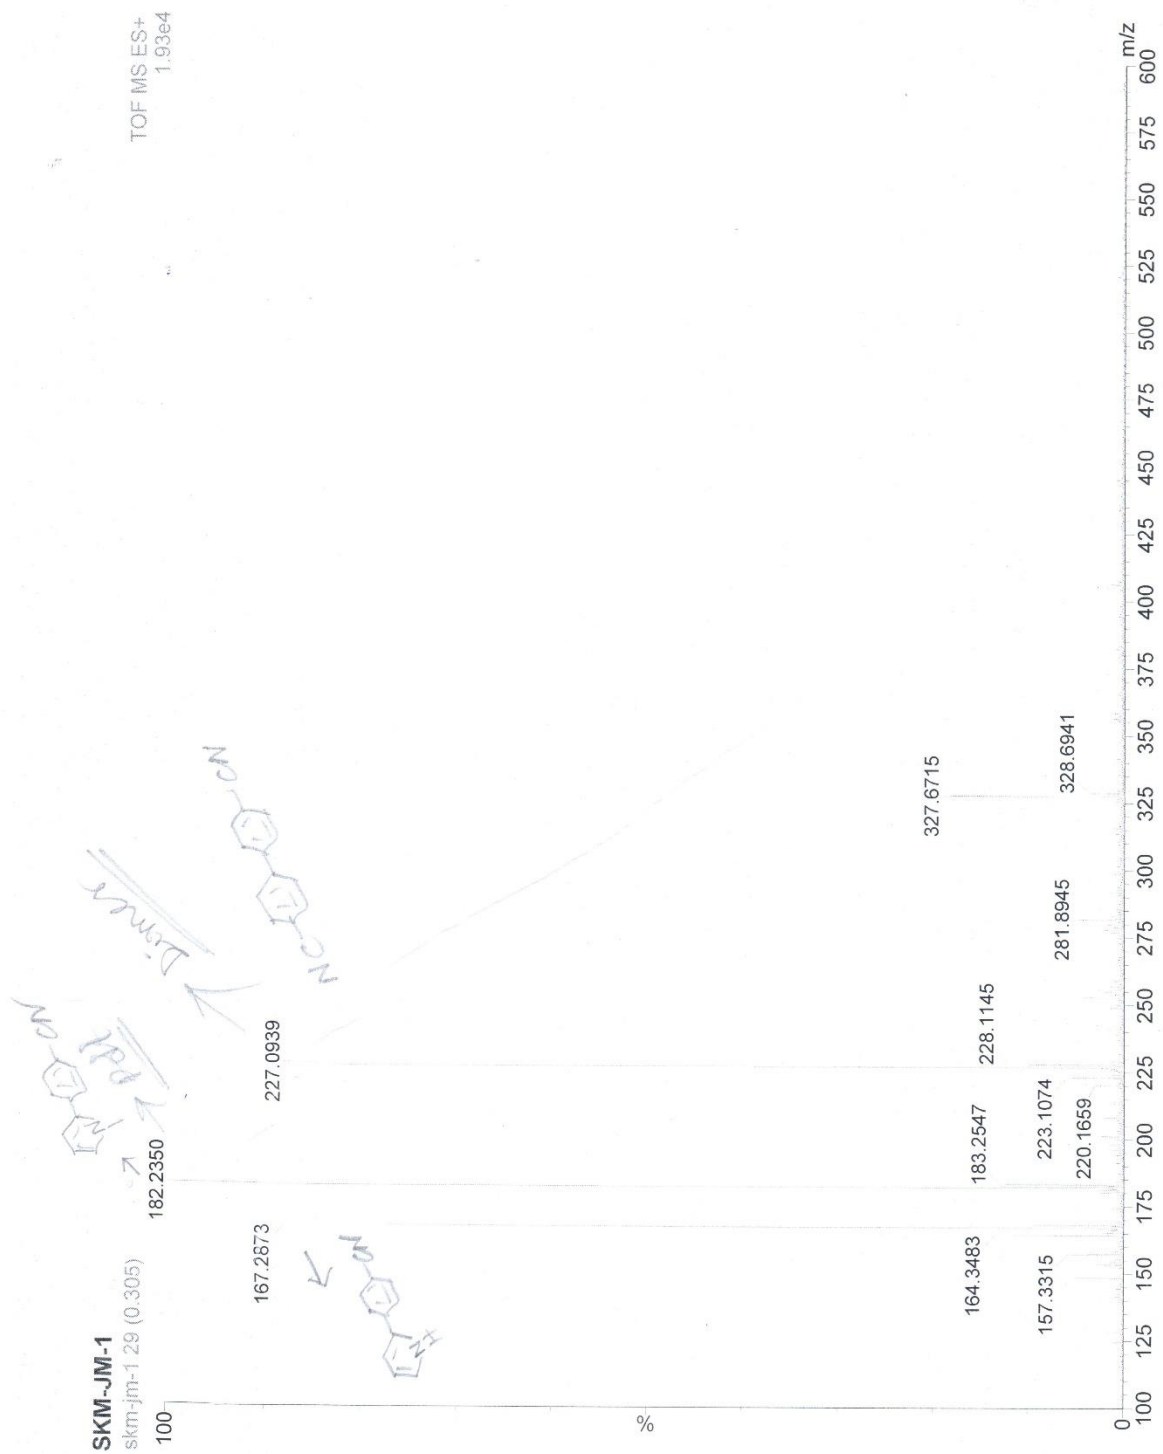

**Figure S98.** Reaction mixture mass spectrum of a catalytic reaction between N-methylpyrrole and chlorobenzonitrile.

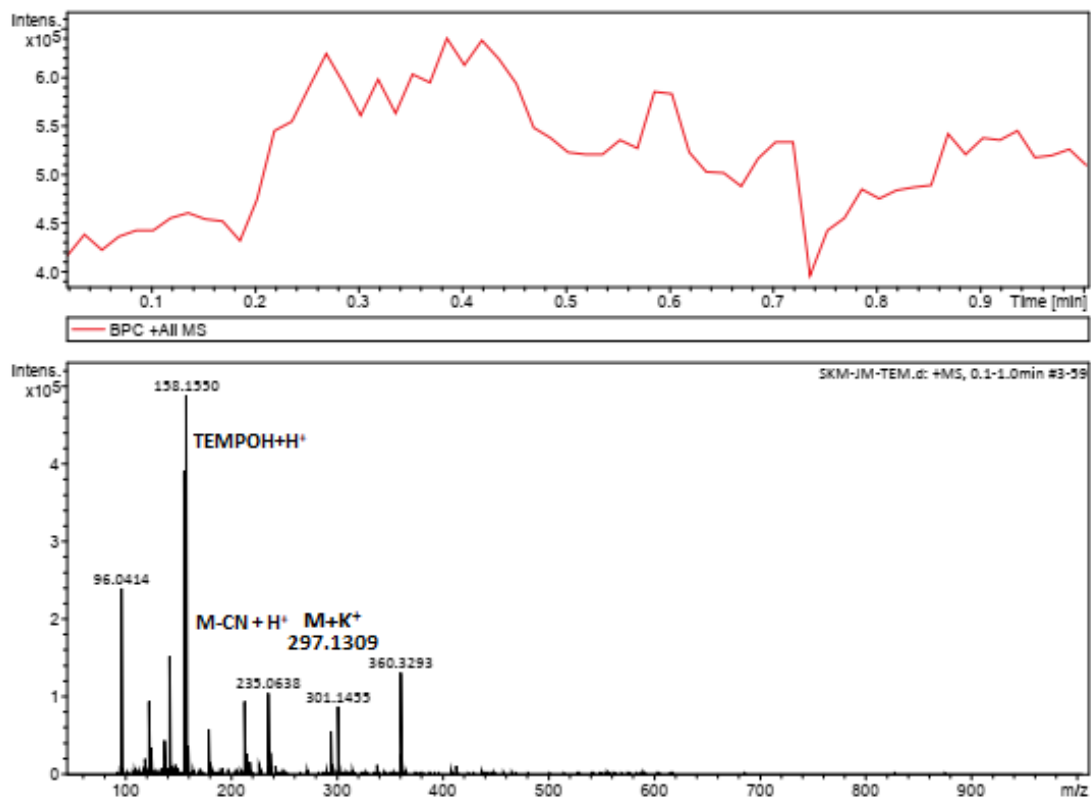

**Figure S99.** Mass spectrum of reaction mixture for radical trapping experiment with TEMPO radical.

## 24. Computational study for the catalytic reactions:

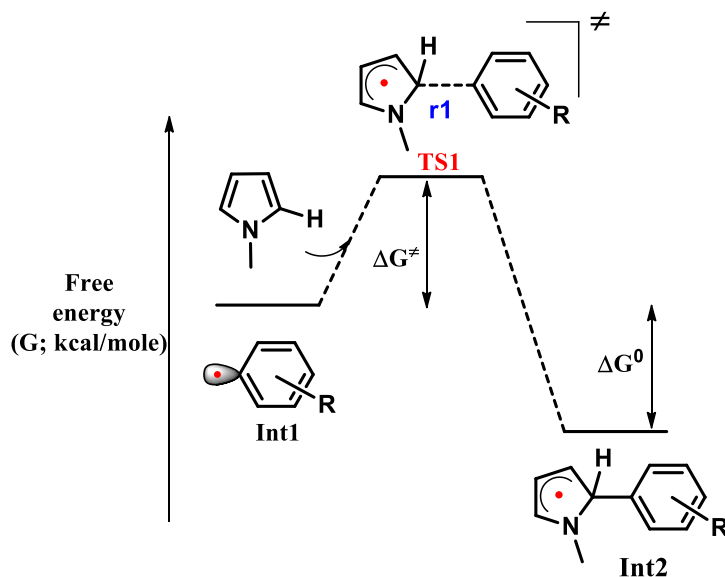

**Figure S100.** Energy profile diagram for aryl radical attack to N-methylpyrrole.

| Substitution (R) | Energy barrier ( $\Delta G^\ddagger$ ) (kcal/mole) | Total Gibbs free energy change ( $\Delta G^0$ ) (kcal/mole) |
|------------------|----------------------------------------------------|-------------------------------------------------------------|
| R = 3, 5-diMe    | 15.5                                               | -9.78                                                       |
| R = 4-Me         | 14.2                                               | -11.6                                                       |
| R = 4-H          | 14.9                                               | -11.1                                                       |
| R = 4-OMe        | 14.4                                               | -12.2                                                       |
| R = 4-Ph         | 13.9                                               | -11.7                                                       |

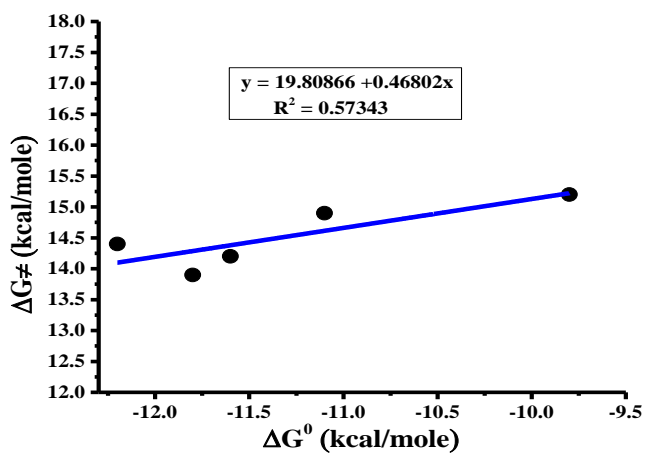

**Figure S101.** Plot of reaction exothermicity and transition state energy barriers.



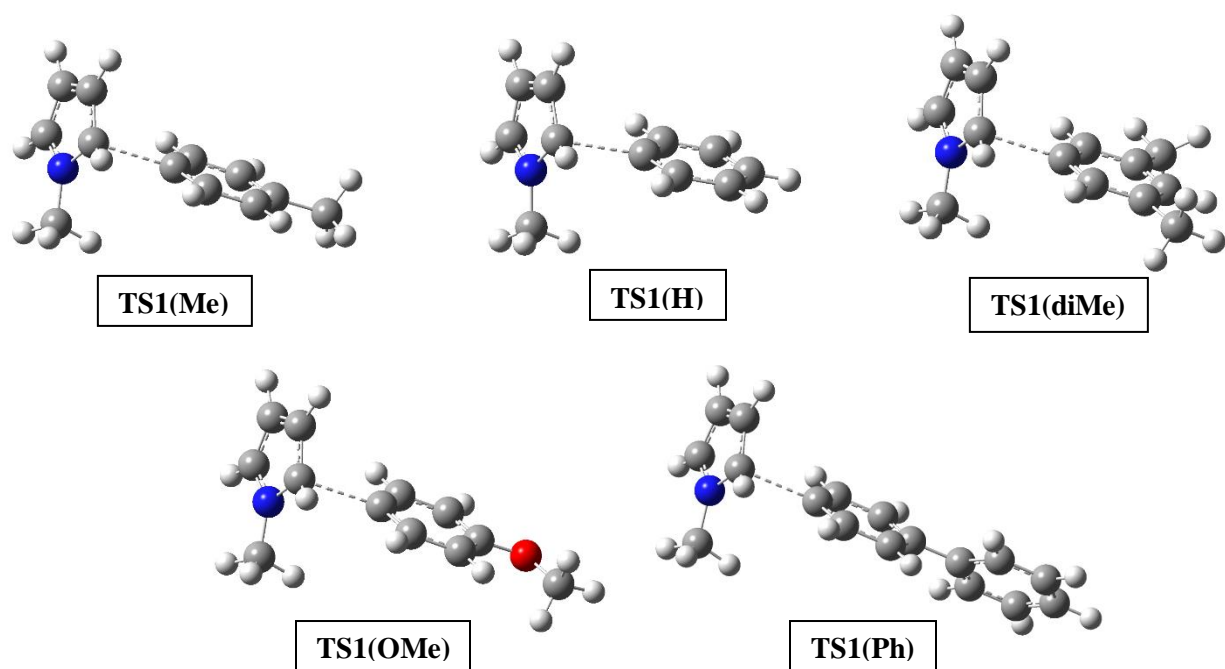

**Figure S102:** Optimized geometries the transition states of with different aryl radical corresponding to **TS1**.

**Table S7:** Energies, enthalpies, and free energies (in Hartree) of the optimized structures of all transition states and intermediates.

| Structure           | ZPE     | $\Delta E$ | $\Delta H$ | $\Delta G$ | E          | H          | G          | IF( $\text{cm}^{-1}$ ) | Infrared |
|---------------------|---------|------------|------------|------------|------------|------------|------------|------------------------|----------|
| <b>Int1(Me)</b>     | 0.11449 | 0.12071    | 0.12165    | 0.08323    | -270.78244 | -270.78149 | -270.81991 |                        |          |
| <b>TS2(Me)</b>      | 0.22503 | 0.23797    | 0.23891    | 0.18076    | -520.16446 | -520.16351 | -520.22166 | -245.5                 | 38.4     |
| <b>Int2(Me)</b>     | 0.22703 | 0.23954    | 0.24048    | 0.18579    | -520.20892 | -520.20798 | -520.26267 |                        |          |
| <b>N-Me-pyrrole</b> | 0.11012 | 0.11571    | 0.11665    | 0.08105    | -249.38960 | -249.38866 | -249.42426 |                        |          |
| <b>Int1(diMe)</b>   | 0.14166 | 0.14982    | 0.15076    | 0.10585    | -310.07536 | -310.07442 | -310.11934 |                        |          |
| <b>TS2(diMe)</b>    | 0.25213 | 0.26699    | 0.26793    | 0.20429    | -559.45676 | -559.45581 | -559.51946 | -253.7                 | 37.5     |
| <b>Int2(diMe)</b>   | 0.25420 | 0.26859    | 0.26954    | 0.21005    | -559.50059 | -559.49965 | -559.55913 |                        |          |

|                  |         |         |         |         |            |            |            |        |      |
|------------------|---------|---------|---------|---------|------------|------------|------------|--------|------|
| <b>Int1(H)</b>   | 0.08720 | 0.09160 | 0.09254 | 0.09254 | -231.49115 | -231.49021 | -231.52361 |        |      |
| <b>TS2(H)</b>    | 0.19785 | 0.20886 | 0.20981 | 0.15794 | -480.87332 | -480.87238 | -480.92425 | -245.5 | 39.4 |
| <b>Int2(H)</b>   | 0.19991 | 0.21048 | 0.21142 | 0.16210 | -480.91716 | -480.91622 | -480.96555 |        |      |
| <b>Int1(OMe)</b> | 0.11977 | 0.12666 | 0.12761 | 0.08806 | -345.98524 | -345.98430 | -346.02385 |        |      |
| <b>TS2(OMe)</b>  | 0.23024 | 0.24388 | 0.24482 | 0.18638 | -595.36782 | -595.36688 | -595.42532 | -235.1 | 38.9 |
| <b>Int2(OMe)</b> | 0.23223 | 0.24545 | 0.24639 | 0.19076 | -595.41282 | -595.41187 | -595.46750 |        |      |
| <b>Int1(Ph)</b>  | 0.16821 | 0.17711 | 0.17805 | 0.13296 | -462.47732 | -462.47638 | -462.52146 |        |      |
| <b>TS2(Ph)</b>   | 0.27863 | 0.29433 | 0.29527 | 0.23068 | -711.86003 | -711.85909 | -711.92368 | -233.6 | 43.6 |
| <b>Int2(Ph)</b>  | 0.28064 | 0.29592 | 0.29687 | 0.23564 | -711.90411 | -711.90317 | -711.96440 |        |      |

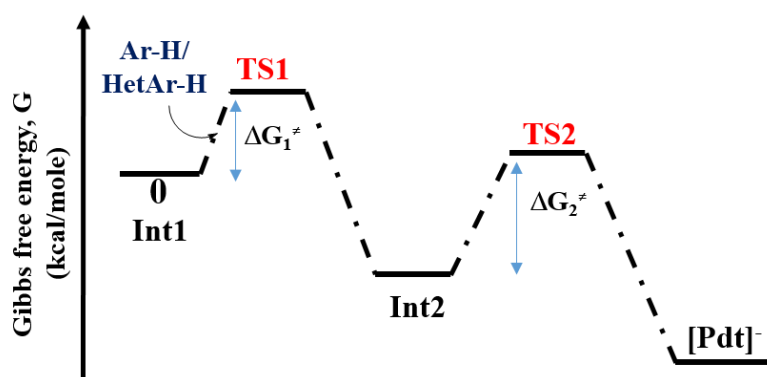

**Figure S103:** Energy profile diagram for full reaction of direct C-H arylation of arenes/heteroarenes.

**Table S8:** Activation energy barriers for different transition states for different arenes and heteroarenes.

| Arenes/<br>HetAr-H | $\Delta G_1^\ddagger$<br>(kcal/mole) | $\Delta G_2^\ddagger$<br>(kcal/mole) |
|--------------------|--------------------------------------|--------------------------------------|
| N-Methylpyrrole    | 13.1                                 | 17.9                                 |
| Furan              | 12.8                                 | 9.1                                  |
| Thiophene          | 14.0                                 | 9.2                                  |
| Benzofuran         | 13.0                                 | 7.5                                  |
| Benzene            | 16.9                                 | 10.4                                 |
| Xylene             | 15.7                                 | 12.5                                 |

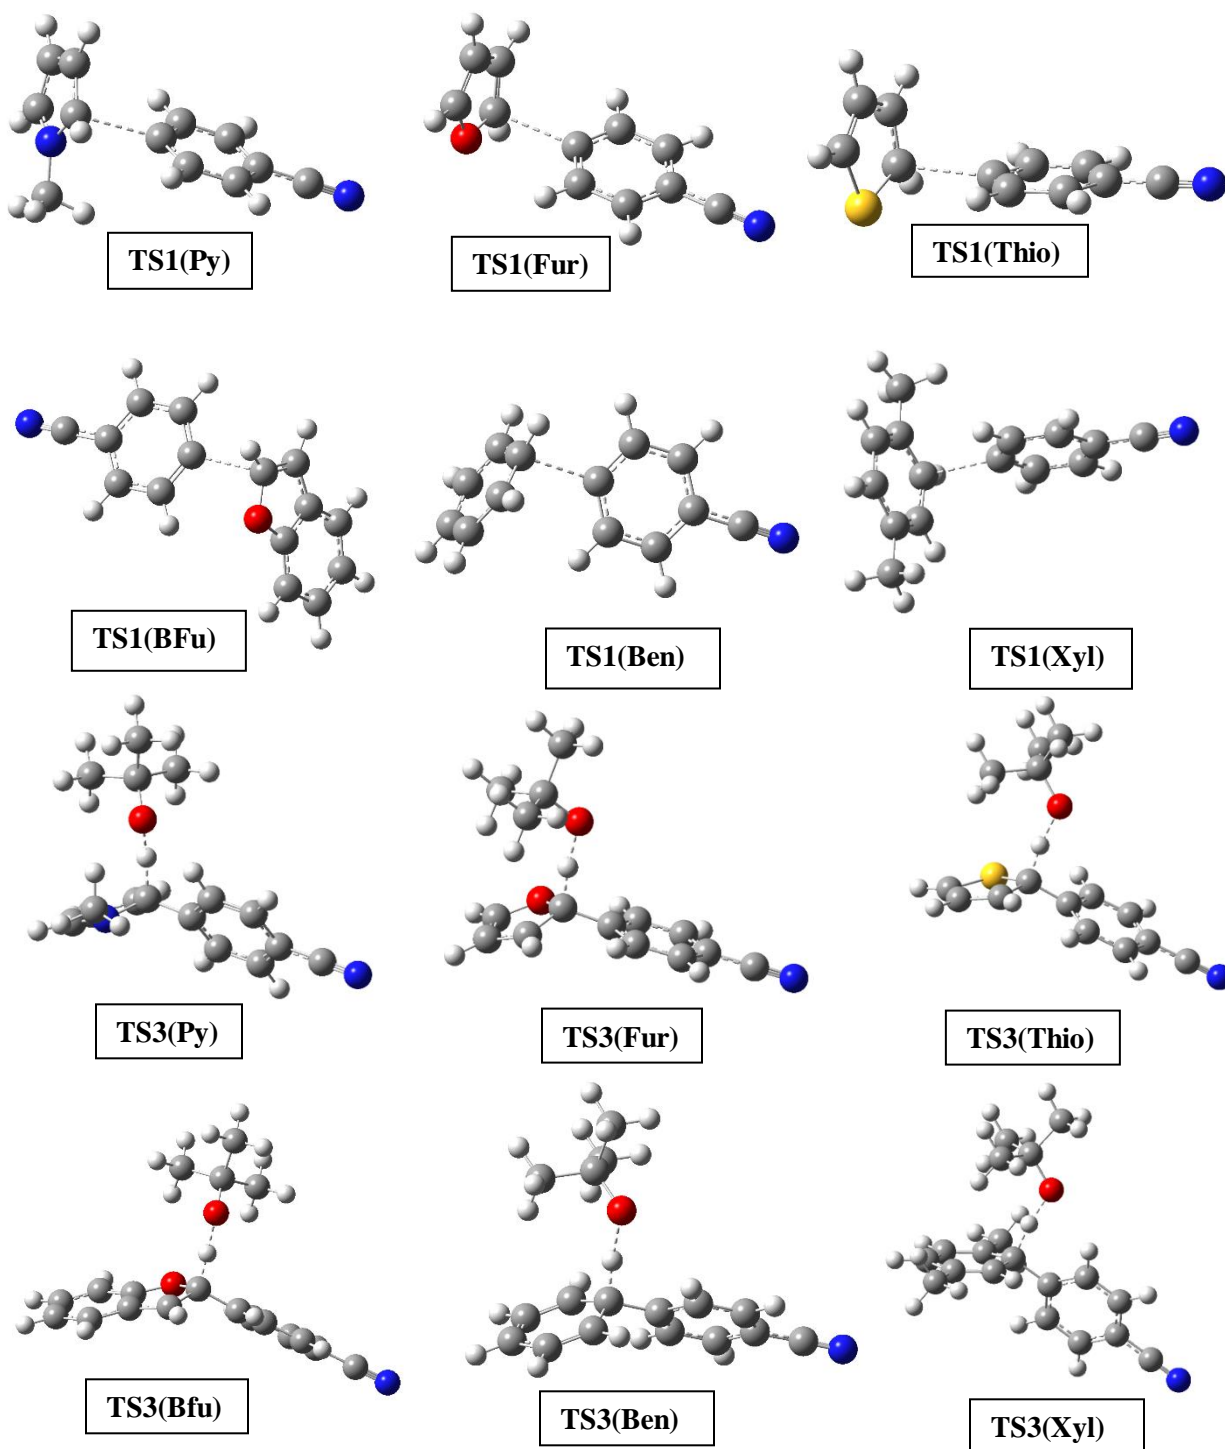

**Figure S104:** Optimized structures of all the transition states (corresponding to TS1 and TS2) for various arenes and heteroarenes with 4-cyanophenyl radical.

**Table S9:** Energies, enthalpies, and free energies (in Hartree) of the optimized structures of all transition states and intermediates with theoretical method b3lyp/6-31+g(d); (CPCM; n, n-dimethylformamide).

| Structure                     | ZPE     | $\Delta E$ | $\Delta H$ | $\Delta G$ | E               | H               | G               | IF(cm <sup>-1</sup> ) | Infrared |
|-------------------------------|---------|------------|------------|------------|-----------------|-----------------|-----------------|-----------------------|----------|
| <b>1a<sup>2-</sup></b>        | 0.15474 | 0.16775    | 0.16870    | 0.11429    | -<br>1250.08055 | -<br>1250.07961 | -<br>1250.13402 |                       |          |
| <b>1a<sup>-</sup></b>         | 0.17093 | 0.17187    | 0.11715    | 0.18076    | -<br>1250.02407 | -<br>1250.02313 | -<br>1250.07785 |                       |          |
| <b>Int1(CN)</b>               | 0.08596 | 0.09208    | 0.09302    | 0.05505    | -323.73923      | -323.73828      | -323.77626      |                       |          |
| <b>N-Me-pyrrole</b>           | 0.11012 | 0.11571    | 0.11665    | 0.08105    | -249.38960      | -249.38866      | -249.42426      |                       |          |
| <b><sup>-</sup>O'Bu</b>       | 0.12043 | 0.12664    | 0.12759    | 0.09194    | -233.0638       | -233.06292      | -233.09856      |                       |          |
| <b>HO'Bu</b>                  | 0.13534 | 0.14192    | 0.14287    | 0.10651    | -233.56515      | -233.56421      | -233.60057      |                       |          |
| <b>TS2(N-py)</b>              | 0.19673 | 0.20864    | 0.20959    | 0.15466    | -573.12508      | -573.12413      | -573.17906      | -173.6                | 50.0     |
| <b>Int2(N-py)</b>             | 0.19856 | 0.21006    | 0.21100    | 0.16002    | -573.16802      | -573.16708      | -573.21806      |                       |          |
| <b>TS3(N-py)</b>              | 0.31615 | 0.33608    | 0.33702    | 0.26548    | -806.21766      | -806.21671      | -806.28825      | -1325                 | 49402.7  |
| <b>Pdt<sup>-1</sup>(N-py)</b> | 0.18548 | 0.19706    | 0.19800    | 0.14649    | -572.70526      | -572.70432      | -572.75583      |                       |          |
| <b>Furan</b>                  | 0.06982 | 0.07355    | 0.07449    | 0.04353    | -229.96801      | -229.96707      | -229.99802      |                       |          |
| <b>TS2(Fur)</b>               | 0.15609 | 0.16709    | 0.16803    | 0.11546    | -553.70232      | -553.70138      | -553.75394      | -209.8                | 49.6     |
| <b>Int2(Fur)</b>              | 0.15836 | 0.16899    | 0.16994    | 0.11971    | -553.75668      | -553.75574      | -553.80597      |                       |          |
| <b>TS3(Fur)</b>               | 0.27589 | 0.29416    | 0.29510    | 0.22694    | -786.82287      | -786.82192      | -786.89009      | -762.0                | 12148.2  |
| <b>Pdt<sup>-1</sup>(Fur)</b>  | 0.14549 | 0.15593    | 0.15687    | 0.10808    | -553.30276      | -553.30182      | -553.3506       |                       |          |
| <b>Thiophene</b>              | 0.06654 | 0.07063    | 0.07158    | 0.03930    | -552.95046      | -552.94951      | -552.98180      |                       |          |
| <b>TS2(Thio)</b>              | 0.15277 | 0.16419    | 0.16513    | 0.11110    | -876.68266      | -876.68172      | -876.73575      | -255.6                | 28.0     |
| <b>Int2(Thio)</b>             | 0.15547 | 0.16656    | 0.16751    | 0.11639    | -876.73912      | -876.73817      | -876.78929      |                       |          |
| <b>TS3(Thio)</b>              | 0.27360 | 0.29223    | 0.29318    | 0.22404    | -<br>1109.80517 | -<br>1109.80423 | -<br>1109.87337 | -439.5                | 5664.9   |

|                              |         |         |         |         |            |            |            |        |        |
|------------------------------|---------|---------|---------|---------|------------|------------|------------|--------|--------|
| <b>Pdt<sup>-1</sup>(Thi)</b> | 0.14253 | 0.15345 | 0.15439 | 0.10430 | -876.28343 | -876.28249 | -876.33259 |        |        |
| <b>Benzene</b>               | 0.10036 | 0.10477 | 0.10571 | 0.07289 | -232.16641 | -232.16547 | -232.19829 |        |        |
| <b>TS2(Ben)</b>              | 0.18649 | 0.19814 | 0.19908 | 0.14543 | -555.89499 | -555.89405 | -555.94770 | -314.4 | 7.3    |
| <b>Int2(Ben)</b>             | 0.18839 | 0.19980 | 0.20075 | 0.14844 | -555.93330 | -555.9323  | -555.98467 |        |        |
| <b>TS3(Ben)</b>              | 0.30827 | 0.32682 | 0.32776 | 0.25945 | -788.99937 | -788.99843 | -789.06675 | -124.7 | 498.4  |
| <b>Pdt<sup>-1</sup>(Ben)</b> | 0.17630 | 0.18746 | 0.18840 | 0.13747 | -555.49285 | -555.49190 | -555.54284 |        |        |
| <b>Xylene</b>                | 0.15465 | 0.16192 | 0.16287 | 0.12210 | -310.75063 | -310.74968 | -310.79045 |        |        |
| <b>TS2(Xyl)</b>              | 0.24099 | 0.25631 | 0.25725 | 0.19432 | -634.47984 | -634.47890 | -634.54183 | -286.1 | 13.0   |
| <b>Int2(Xyl)</b>             | 0.24341 | 0.25817 | 0.25911 | 0.19984 | -634.51878 | -634.51784 | -634.57711 |        |        |
| <b>TS3(Xyl)</b>              | 0.36120 | 0.38355 | 0.38449 | 0.30807 | -867.58033 | -867.57939 | -867.65581 | -993.1 | 9473.3 |
| <b>Pdt<sup>-1</sup>(Xyl)</b> | 0.23117 | 0.24562 | 0.24657 | 0.18866 | -634.06698 | -634.06604 | -634.12395 |        |        |
| <b>BenzoFur</b>              | 0.11707 | 0.12306 | 0.12401 | 0.08692 | -383.57876 | -383.57782 | -383.61491 |        |        |
| <b>TS2(BFu)</b>              | 0.20314 | 0.21656 | 0.21750 | 0.15902 | -707.31307 | -707.31212 | -707.37061 | -201.7 | 38.1   |
| <b>Int2(BFu)</b>             | 0.20567 | 0.21871 | 0.21965 | 0.16343 | -707.37073 | -707.36979 | -707.42601 |        |        |
| <b>TS3(BFu)</b>              | 0.32391 | 0.34447 | 0.34542 | 0.27163 | -940.43980 | -940.43885 | -940.51264 | -317.4 | 3358.9 |
| <b>Pdt<sup>-1</sup>(BFu)</b> | 0.19263 | 0.20557 | 0.20651 | 0.15176 | -706.92026 | -706.91931 | -706.97406 |        |        |

**Table S10:** Energies, enthalpies, and free energies (in Hartree) of the optimized structures of all transition states and intermediates with theoretical method wB97XD/6-31+g(d); (CPCM; n, n-dimethylformamide).

| Structure              | ZPE     | $\Delta E$ | $\Delta H$ | $\Delta G$ | E               | H               | G               | IF(cm <sup>-1</sup> ) | Infrared |
|------------------------|---------|------------|------------|------------|-----------------|-----------------|-----------------|-----------------------|----------|
| <b>1a<sup>2-</sup></b> | 0.15703 | 0.16987    | 0.17081    | 0.11658    | -<br>1249.84104 | -<br>1249.84010 | -<br>1249.89433 |                       |          |
| <b>1a<sup>-</sup></b>  | 0.16043 | 0.17286    | 0.17380    | 0.11940    | -<br>1249.78693 | -<br>1249.78599 | -<br>1249.84039 |                       |          |

|                             |         |         |         |         |            |            |            |        |         |
|-----------------------------|---------|---------|---------|---------|------------|------------|------------|--------|---------|
| <b>Sub</b>                  | 0.09074 | 0.09796 | 0.09890 | 0.05829 | -783.87263 | -783.87168 | -783.91229 |        |         |
| <b>Sub<sup>-</sup></b>      | 0.08730 | 0.09556 | 0.09651 | 0.05329 | -783.92734 | -783.92640 | -783.96962 |        |         |
| <b>Int1(CN)</b>             | 0.08713 | 0.09316 | 0.09411 | 0.05629 | -323.60734 | -323.60639 | -323.64421 |        |         |
| <b>N-Me-pyrrole</b>         | 0.11155 | 0.11627 | 0.11722 | 0.08363 | -249.29259 | -249.29164 | -249.32523 |        |         |
| <b><sup>-</sup>O'Bu</b>     | 0.12311 | 0.12924 | 0.13019 | 0.09461 | -232.97528 | -232.97433 | -233.00991 |        |         |
| <b>HO'Bu</b>                | 0.13716 | 0.14373 | 0.14467 | 0.10832 | -233.47407 | -233.47313 | -233.50948 |        |         |
| <b>TS2(CN)</b>              | 0.19929 | 0.21194 | 0.21288 | 0.15658 | -572.90122 | -572.90028 | -572.95658 | -253.2 | 114.3   |
| <b>Int2(CN)</b>             | 0.20140 | 0.21365 | 0.21460 | 0.16109 | -572.94984 | -572.94889 | -573.00239 |        |         |
| <b>TS3(CN)</b>              | 0.32145 | 0.34086 | 0.34180 | 0.27297 | -805.92210 | -805.92116 | -805.99000 | -1430  | 14429.4 |
| <b>Pdt<sup>-1</sup>(CN)</b> | 0.18806 | 0.19874 | 0.19968 | 0.15022 | -572.48650 | -572.48556 | -572.53502 |        |         |

**Table S11:** Energies, enthalpies, and free energies (in Hartree) of the optimized structures of different molecules (Opt) and their monoreduced moieties' single point (SP) calculation at the  $\omega$ B97XD theory level with 6-31+g(d) basis set considering CPCM (n,n-dimethylformamide) solvent model.

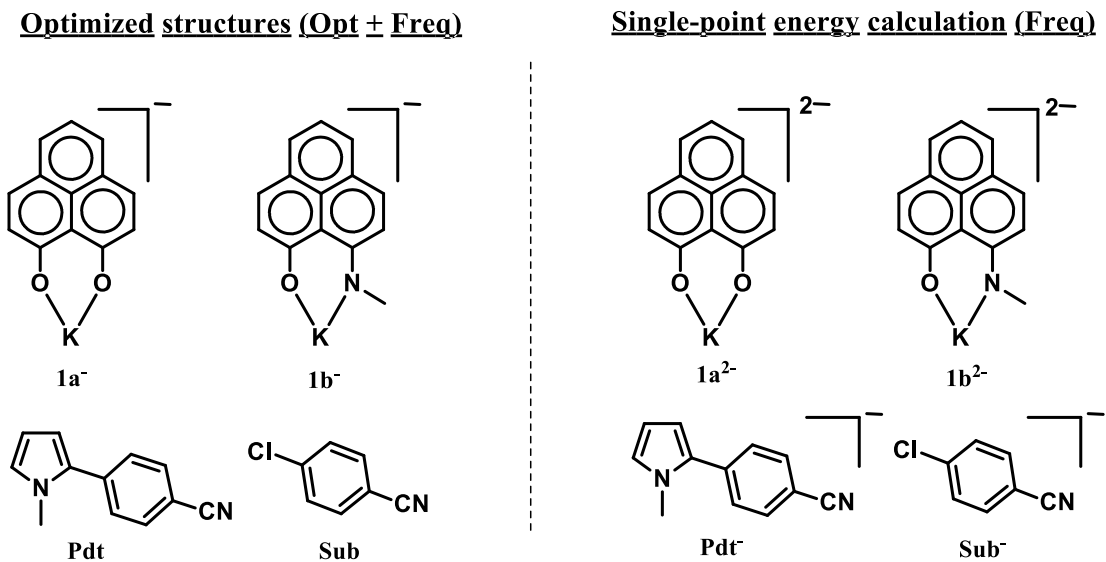

| Structure                   | ZPE     | $\Delta E$ | $\Delta H$ | $\Delta G$ | E               | H               | G               | IF(cm <sup>-1</sup> ) | Infrared |
|-----------------------------|---------|------------|------------|------------|-----------------|-----------------|-----------------|-----------------------|----------|
| <b>1a<sup>-</sup>(O+F)</b>  | 0.16043 | 0.17286    | 0.17380    | 0.11940    | -<br>1249.78693 | -<br>1249.78599 | -<br>1249.84039 |                       |          |
| <b>1b<sup>-</sup>(O+F)</b>  | 0.20080 | 0.21473    | 0.21568    | 0.15741    | -<br>1269.13923 | -<br>1269.13828 | -<br>1269.19655 |                       |          |
| <b>Pdt<sup>-</sup>(O+F)</b> | 0.19292 | 0.20447    | 0.20541    | 0.15478    | -572.40819      | -572.40724      | -572.45787      |                       |          |
| <b>Sub<sup>-</sup>(O+F)</b> | 0.09074 | 0.09796    | 0.09890    | 0.05829    | -783.87263      | -783.87168      | -783.91229      |                       |          |
| <b>1a<sup>2-</sup>(SP)</b>  | 0.15708 | 0.16861    | 0.16955    | 0.11892    | -<br>1249.83720 | -<br>1249.83626 | -<br>1249.88689 |                       |          |
| <b>1b<sup>2-</sup>(SP)</b>  | 0.19716 | 0.21023    | 0.21118    | 0.15701    | -<br>1269.18550 | -<br>1269.18455 | -<br>1269.23872 |                       |          |
| <b>Pdt<sup>-</sup>(SP)</b>  | 0.18837 | 0.19849    | 0.19943    | 0.15158    | -572.48337      | -572.48243      | -572.53029      |                       |          |
| <b>Sub<sup>-</sup>(SP)</b>  | 0.08626 | 0.09414    | 0.09508    | 0.05222    | -783.92151      | -783.92057      | -783.96343      |                       |          |

**Table S12:** Energies, enthalpies, and free energies (in Hartree) of the optimized structures of different monoreduced molecules (Opt) and their neutral moieties' single point (SP) calculation at the  $\omega$ B97XD theory level with 6-31+g(d) basis set considering CPCM (n,n-dimethylformamide) solvent model.

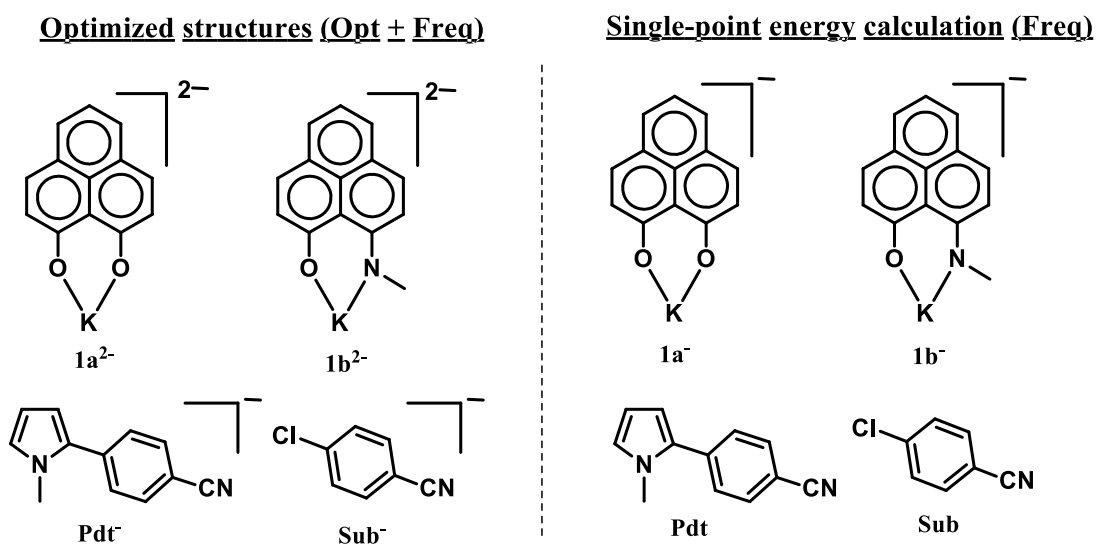

| Structure                   | ZPE     | $\Delta E$ | $\Delta H$ | $\Delta G$ | E               | H               | G               | IF(cm <sup>-1</sup> ) | Infrared |
|-----------------------------|---------|------------|------------|------------|-----------------|-----------------|-----------------|-----------------------|----------|
| <b>1a<sup>2</sup>(O+F)</b>  | 0.15703 | 0.16987    | 0.17081    | 0.11658    | -<br>1249.84104 | -<br>1249.84010 | -<br>1249.89433 |                       |          |
| <b>1b<sup>2</sup>(O+F)</b>  | 0.19700 | 0.21125    | 0.21219    | 0.15503    | -<br>1269.18957 | -<br>1269.18863 | -<br>1269.24579 |                       |          |
| <b>Pdt<sup>-</sup>(O+F)</b> | 0.18891 | 0.20089    | 0.20183    | 0.14961    | -572.48798      | -572.48703      | -572.53926      |                       |          |
| <b>Sub<sup>-</sup>(O+F)</b> | 0.08730 | 0.09556    | 0.09651    | 0.05329    | -783.92734      | -783.92640      | -783.96962      |                       |          |
| <b>1a<sup>-</sup>(SP)</b>   | 0.15975 | 0.17191    | 0.17285    | 0.11991    | -<br>1249.78295 | -<br>1249.78200 | -<br>1249.83495 |                       |          |
| <b>1b<sup>-</sup>(SP)</b>   | 0.19992 | 0.21351    | 0.21445    | 0.15858    | -<br>1269.13548 | -<br>1269.13454 | -<br>1269.19040 |                       |          |
| <b>Pdt(SP)</b>              | 0.19214 | 0.20334    | 0.20429    | 0.1550     | -572.40230      | -572.40136      | -572.45062      |                       |          |
| <b>Sub(SP)</b>              | 0.08945 | 0.09656    | 0.09751    | 0.05723    | -783.86648      | -783.86554      | -783.90581      |                       |          |

**Table S13:** Electron transfer energy barriers for substrate activation process.

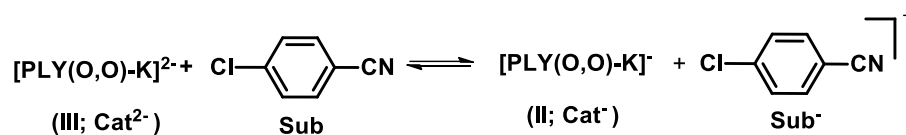

| Computational method                    | Reorganization Energy (eV) | Driving force $\Delta G^0$ (kcal/mol) | Activation energy barrier $\Delta G^\ddagger$ (kcal/mol) |
|-----------------------------------------|----------------------------|---------------------------------------|----------------------------------------------------------|
| Basis set: 6-31+g(d)<br>Solvation: CPCM | $\lambda_1 = 0.3165$       | -2.14                                 | $\Delta G^\ddagger_{\lambda_1} = 3.82$                   |
|                                         | $\lambda_2 = 0.3787$       | -2.14                                 | $\Delta G^\ddagger_{\lambda_2} = 5.22$                   |
| Basis set: 6-31+g(d)<br>Solvation: SMD  | $\lambda_1 = 0.3175$       | 1.03                                  | $\Delta G^\ddagger_{\lambda_1} = 2.38$                   |
|                                         | $\lambda_2 = 0.3550$       | 1.03                                  | $\Delta G^\ddagger_{\lambda_2} = 2.59$                   |
| Basis set: def2tzvpp<br>Solvation: CPCM | $\lambda_1 = 0.3027$       | -2.49                                 | $\Delta G^\ddagger_{\lambda_1} = 0.72$                   |
|                                         | $\lambda_2 = 0.3878$       | -2.49                                 | $\Delta G^\ddagger_{\lambda_2} = 1.16$                   |
| Basis set: def2tzvpp<br>Solvation: SMD  | $\lambda_1 = 0.2892$       | 1.39                                  | $\Delta G^\ddagger_{\lambda_1} = 2.43$                   |
|                                         | $\lambda_2 = 0.2545$       | 1.39                                  | $\Delta G^\ddagger_{\lambda_2} = 2.43$                   |



**Table S14:** Electron transfer energy barriers for catalyst regeneration process.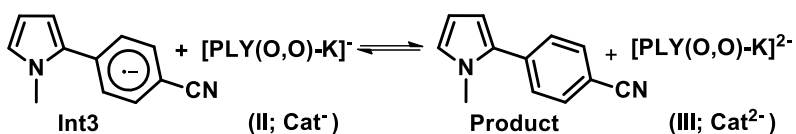

| Computational method                    | Reorganization Energy (eV) | Driving force $\Delta G^0$ (kcal/mol) | Activation energy barrier $\Delta G^\ddagger$ (kcal/mol) |
|-----------------------------------------|----------------------------|---------------------------------------|----------------------------------------------------------|
| Basis set: 6-31+g(d)<br>Solvation: CPCM | $\lambda_1 = 0.3998$       | 17.3                                  | $\Delta G^\ddagger_{\lambda_1} = 18.9$                   |
|                                         | $\lambda_2 = 0.3924$       | 17.3                                  | $\Delta G^\ddagger_{\lambda_2} = 19.0$                   |
| Basis set: 6-31+g(d)<br>Solvation: SMD  | $\lambda_1 = 0.3768$       | 14.7                                  | $\Delta G^\ddagger_{\lambda_1} = 15.7$                   |
|                                         | $\lambda_2 = 0.4057$       | 14.7                                  | $\Delta G^\ddagger_{\lambda_2} = 15.5$                   |
| Basis set: def2tzvpp<br>Solvation: CPCM | $\lambda_1 = 0.4189$       | 17.5                                  | $\Delta G^\ddagger_{\lambda_1} = 19.1$                   |
|                                         | $\lambda_2 = 0.4131$       | 17.5                                  | $\Delta G^\ddagger_{\lambda_2} = 19.2$                   |
| Basis set: def2tzvpp<br>Solvation: SMD  | $\lambda_1 = 0.3914$       | 14.2                                  | $\Delta G^\ddagger_{\lambda_1} = 14.9$                   |
|                                         | $\lambda_2 = 0.3965$       | 14.2                                  | $\Delta G^\ddagger_{\lambda_2} = 14.9$                   |

**Table S15:** Electron transfer energy barriers for radical chain propagation process.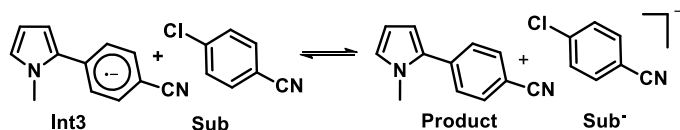

| Computational method                    | Reorganization Energy (eV) | Driving force $\Delta G^0$ (kcal/mol) | Activation energy barrier $\Delta G^\ddagger$ (kcal/mol) |
|-----------------------------------------|----------------------------|---------------------------------------|----------------------------------------------------------|
| Basis set: 6-31+g(d)<br>Solvation: CPCM | $\lambda_1 = 0.3655$       | 15.1                                  | $\Delta G^\ddagger_{\lambda_1} = 16.4$                   |
|                                         | $\lambda_2 = 0.4201$       | 15.1                                  | $\Delta G^\ddagger_{\lambda_2} = 15.8$                   |
| Basis set: 6-31+g(d)<br>Solvation: SMD  | $\lambda_1 = 0.3590$       | 15.7                                  | $\Delta G^\ddagger_{\lambda_1} = 17.4$                   |
|                                         | $\lambda_2 = 0.4254$       | 15.7                                  | $\Delta G^\ddagger_{\lambda_2} = 16.6$                   |
| Basis set: def2tzvpp<br>Solvation: CPCM | $\lambda_1 = 0.3567$       | 15.0                                  | $\Delta G^\ddagger_{\lambda_1} = 16.4$                   |
|                                         | $\lambda_2 = 0.4361$       | 15.0                                  | $\Delta G^\ddagger_{\lambda_2} = 15.6$                   |
| Basis set: def2tzvpp<br>Solvation: SMD  | $\lambda_1 = 0.3396$       | 15.6                                  | $\Delta G^\ddagger_{\lambda_1} = 17.5$                   |
|                                         | $\lambda_2 = 0.4307$       | 15.6                                  | $\Delta G^\ddagger_{\lambda_2} = 16.4$                   |

**Table S16:** Energies, enthalpies, and free energies (in Hartree) of the optimized structures of different monoreduced molecules (Opt) and their neutral moieties' single point (SP) calculation at the  $wB97XD$  theory level with 6-31+g(d) basis set considering SMD (n,n-dimethylformamide) solvent model.

| Structure                        | ZPE     | $\Delta E$ | $\Delta H$ | $\Delta G$ | E          | H          | G          | IF(<br>cm <sup>-1</sup> ) | Infra<br>red |
|----------------------------------|---------|------------|------------|------------|------------|------------|------------|---------------------------|--------------|
| <b>1a<sup>2-</sup>(O+F)</b>      | 0.15717 | 0.16994    | 0.17088    | 0.11707    | -1249.8315 | -1249.8305 | -1249.8843 |                           |              |
| <b>1a<sup>2-</sup>(SP)</b>       | 0.15684 | 0.16842    | 0.16937    | 0.11883    | -1249.8280 | -1249.8271 | -1249.8776 |                           |              |
| <b>1a<sup>1-</sup>(O+F)</b>      | 0.16046 | 0.17285    | 0.17379    | 0.11988    | -1249.7748 | -1249.7739 | -1249.8278 |                           |              |
| <b>1a<sup>1-</sup>(SP)</b>       | 0.15993 | 0.17201    | 0.17296    | 0.12031    | -1249.7705 | -1249.7695 | -1249.8222 |                           |              |
| <b>Pdt<sup>-</sup><br/>(O+F)</b> | 0.18900 | 0.20093    | 0.20187    | 0.14982    | -572.4955  | -572.4945  | -572.5466  |                           |              |
| <b>Pdt<sup>-</sup>(SP)</b>       | 0.18868 | 0.19867    | 0.19961    | 0.15216    | -572.4908  | -572.4898  | -572.5373  |                           |              |
| <b>Pdt(O+F)</b>                  | 0.19299 | 0.20446    | 0.20541    | 0.15496    | -572.4171  | -572.4162  | -572.4666  |                           |              |
| <b>Pdt(SP)</b>                   | 0.19213 | 0.20329    | 0.20424    | 0.15510    | -572.4113  | -572.4103  | -572.4595  |                           |              |
| <b>Sub<sup>-</sup><br/>(O+F)</b> | 0.08725 | 0.09548    | 0.09643    | 0.05326    | -783.9302  | -783.9293  | -783.9725  |                           |              |
| <b>Sub<sup>-</sup>(SP)</b>       | 0.08629 | 0.09416    | 0.09510    | 0.05220    | -783.9244  | -783.9235  | -783.9664  |                           |              |
| <b>Sub(O+F)</b>                  | 0.09072 | 0.09793    | 0.09887    | 0.05826    | -783.8779  | -783.8769  | -783.9176  |                           |              |
| <b>Sub(SP)</b>                   | 0.08944 | 0.09656    | 0.09751    | 0.05719    | -783.8719  | -783.8709  | -783.9112  |                           |              |

**Table S17:** Energies, enthalpies, and free energies (in Hartree) of the optimized structures of different monoreduced molecules (Opt) and their neutral moieties' single point (SP) calculation at the  $wB97XD$  theory level with def2tzvpp basis set considering CPCM (n,n-dimethylformamide) solvent model.

| Structure | ZPE | $\Delta E$ | $\Delta H$ | $\Delta G$ | E | H | G | IF(cm <sup>-1</sup> ) | Infrared |
|-----------|-----|------------|------------|------------|---|---|---|-----------------------|----------|
|-----------|-----|------------|------------|------------|---|---|---|-----------------------|----------|

|                                  |         |         |         |         |                |                |                |  |  |
|----------------------------------|---------|---------|---------|---------|----------------|----------------|----------------|--|--|
| <b>1a<sup>2-</sup>(O+F)</b>      | 0.15699 | 0.16962 | 0.17056 | 0.11714 | -<br>1250.0848 | -<br>1250.0839 | -<br>1250.1373 |  |  |
| <b>1a<sup>2-</sup>(SP)</b>       | 0.15696 | 0.16829 | 0.16923 | 0.11928 | -<br>1250.0808 | -<br>1250.0798 | -<br>1250.1298 |  |  |
| <b>1a<sup>1-</sup>(O+F)</b>      | 0.16025 | 0.17260 | 0.17354 | 0.11934 | -<br>1250.0316 | -<br>1250.0307 | -<br>1250.0849 |  |  |
| <b>1a<sup>1-</sup>(SP)</b>       | 0.15969 | 0.17171 | 0.17265 | 0.12004 | -<br>1250.0273 | -<br>1250.0264 | -<br>1250.0790 |  |  |
| <b>Pdt<sup>-</sup><br/>(O+F)</b> | 0.18852 | 0.20036 | 0.20130 | 0.14946 | -572.6757      | -572.6748      | -572.7266      |  |  |
| <b>Pdt<sup>-</sup>(SP)</b>       | 0.18805 | 0.19799 | 0.19893 | 0.15164 | -572.6710      | -572.6700      | -572.7173      |  |  |
| <b>Pdt(O+F)</b>                  | 0.19242 | 0.20391 | 0.20486 | 0.15429 | -572.5966      | -572.5956      | -572.6462      |  |  |
| <b>Pdt(SP)</b>                   | 0.19193 | 0.20297 | 0.20391 | 0.15509 | -572.5905      | -572.5895      | -572.6383      |  |  |
| <b>Sub<sup>-</sup><br/>(O+F)</b> | 0.08884 | 0.09688 | 0.09782 | 0.05513 | -784.0640      | -784.0630      | -784.1057      |  |  |
| <b>Sub<sup>-</sup>(SP)</b>       | 0.08666 | 0.09436 | 0.09530 | 0.05282 | -784.0589      | -784.0580      | -784.1005      |  |  |
| <b>Sub(O+F)</b>                  | 0.09060 | 0.09778 | 0.09872 | 0.05820 | -784.0097      | -784.0087      | -784.0493      |  |  |
| <b>Sub(SP)</b>                   | 0.08931 | 0.09638 | 0.09733 | 0.05712 | -784.0033      | -784.0023      | -784.0425      |  |  |

**Table S18:** Energies, enthalpies, and free energies (in Hartree) of the optimized structures of different monoreduced molecules (Opt) and their neutral moieties' single point (SP) calculation at the  $wB97XD$  theory level with def2tzvpp basis set considering SMD (n,n-dimethylformamide) solvent model.

| <b>Structure</b>            | <b>ZPE</b> | <b><math>\Delta E</math></b> | <b><math>\Delta H</math></b> | <b><math>\Delta G</math></b> | <b>E</b>       | <b>H</b>       | <b>G</b>       | <b>IF(cm<sup>-1</sup>)</b> | <b>Infrared</b> |
|-----------------------------|------------|------------------------------|------------------------------|------------------------------|----------------|----------------|----------------|----------------------------|-----------------|
| <b>1a<sup>2-</sup>(O+F)</b> | 0.15689    | 0.16954                      | 0.17048                      | 0.11719                      | -<br>1250.0778 | -<br>1250.0769 | -<br>1250.1302 |                            |                 |
| <b>1a<sup>2-</sup>(SP)</b>  | 0.15686    | 0.16820                      | 0.16914                      | 0.11932                      | -<br>1250.0741 | -<br>1250.0731 | -<br>1250.1229 |                            |                 |
| <b>1a<sup>1-</sup>(O+F)</b> | 0.16036    | 0.17264                      | 0.17359                      | 0.11985                      | -<br>1250.0206 | -<br>1250.0197 | -<br>1250.0734 |                            |                 |

|                                  |         |         |         |         |                |                |                |  |  |
|----------------------------------|---------|---------|---------|---------|----------------|----------------|----------------|--|--|
| <b>1a<sup>1-</sup>(SP)</b>       | 0.15974 | 0.17174 | 0.17269 | 0.12025 | -<br>1250.0166 | -<br>1250.0157 | -<br>1250.0681 |  |  |
| <b>Pdt<sup>-</sup><br/>(O+F)</b> | 0.18862 | 0.20041 | 0.20136 | 0.14964 | -572.6829      | -572.6820      | -572.7337      |  |  |
| <b>Pdt<sup>-</sup>(SP)</b>       | 0.18815 | 0.19805 | 0.19899 | 0.15181 | -572.6782      | -572.6773      | -572.7245      |  |  |
| <b>Pdt(O+F)</b>                  | 0.19243 | 0.20386 | 0.20481 | 0.15446 | -572.6050      | -572.6040      | -572.6544      |  |  |
| <b>Pdt(SP)</b>                   | 0.19156 | 0.20268 | 0.20363 | 0.15459 | -572.5991      | -572.5982      | -572.6472      |  |  |
| <b>Sub<sup>-</sup><br/>(O+F)</b> | 0.08858 | 0.09659 | 0.09753 | 0.05487 | -784.0670      | -784.0660      | -784.1087      |  |  |
| <b>Sub<sup>-</sup>(SP)</b>       | 0.08669 | 0.09438 | 0.09532 | 0.05281 | -784.0618      | -784.0609      | -784.1034      |  |  |
| <b>Sub(O+F)</b>                  | 0.09059 | 0.09776 | 0.09871 | 0.05819 | -784.0146      | -784.0137      | -784.0542      |  |  |
| <b>Sub(SP)</b>                   | 0.08933 | 0.09641 | 0.09736 | 0.05713 | -784.0083      | -784.0074      | -784.0476      |  |  |

## 25. Coordinates of all DFT optimized structures:

### PLY(O,O)-K (1a)

0 1

|   |             |             |             |
|---|-------------|-------------|-------------|
| C | -3.42480600 | -1.20319500 | -0.00027000 |
| C | -4.13187500 | 0.00000800  | -0.00012600 |
| C | -1.27383800 | 0.00000000  | 0.00001800  |
| C | -2.01929800 | -1.22413200 | -0.00023200 |
| H | -5.21816500 | 0.00001100  | -0.00018000 |
| C | 0.06188400  | 2.48825800  | 0.00007700  |
| C | -1.29737700 | -2.46504500 | -0.00030600 |
| C | 0.06187100  | -2.48826400 | 0.00007700  |
| H | 0.60728200  | 3.42901000  | 0.00002400  |
| H | 0.60726400  | -3.42901900 | 0.00016600  |
| C | 0.87443800  | 1.27432200  | -0.00009300 |
| C | 0.16365900  | -0.00000400 | 0.00009800  |
| C | 0.87443300  | -1.27433300 | 0.00036700  |
| C | -2.01929200 | 1.22413700  | 0.00019100  |
| C | -1.29736400 | 2.46504600  | 0.00032300  |
| C | -3.42480100 | 1.20320900  | 0.00009000  |
| H | -1.86410600 | 3.39477000  | 0.00049900  |
| H | -3.96141100 | 2.14982600  | 0.00021000  |
| H | -3.96142200 | -2.14981000 | -0.00044800 |
| H | -1.86412400 | -3.39476600 | -0.00055200 |

|   |            |             |             |
|---|------------|-------------|-------------|
| O | 2.13565600 | -1.40001400 | 0.00089500  |
| O | 2.13566200 | 1.39999500  | -0.00053400 |
| K | 4.34728100 | 0.00000400  | -0.00020500 |

**[PLY(O,O)-K]<sup>-1</sup>**

-1 2

|   |             |             |             |
|---|-------------|-------------|-------------|
| C | -3.44984600 | -1.20842800 | -0.00016700 |
| C | -4.14717500 | 0.00000900  | -0.00022300 |
| C | -1.27175800 | 0.00000100  | 0.00006800  |
| C | -2.02263400 | -1.23409700 | -0.00005100 |
| H | -5.23622700 | 0.00001300  | -0.00034600 |
| C | 0.08184600  | 2.47014200  | 0.00007700  |
| C | -1.30348000 | -2.45397500 | -0.00000400 |
| C | 0.08183100  | -2.47014800 | 0.00018500  |
| H | 0.61776100  | 3.41893600  | -0.00000100 |
| H | 0.61774000  | -3.41894500 | 0.00025400  |
| C | 0.88530300  | 1.28677900  | 0.00027800  |
| C | 0.17508400  | -0.00000400 | 0.00021900  |
| C | 0.88529700  | -1.28678900 | 0.00027200  |
| C | -2.02262600 | 1.23410300  | 0.00003000  |
| C | -1.30346500 | 2.45397700  | 0.00002800  |
| C | -3.44983800 | 1.20844200  | -0.00014900 |
| H | -1.86016900 | 3.39153500  | -0.00007600 |

|   |             |             |             |
|---|-------------|-------------|-------------|
| H | -3.98700300 | 2.15577400  | -0.00021400 |
| H | -3.98701700 | -2.15575600 | -0.00024700 |
| H | -1.86018900 | -3.39152900 | -0.00008300 |
| O | 2.17658500  | -1.40909300 | 0.00016900  |
| O | 2.17659200  | 1.40906800  | 0.00026900  |
| K | 4.31781300  | 0.00000500  | -0.00032500 |

**[PLY(O,O)-K]<sup>-2</sup>**

-2 1

|   |             |             |             |
|---|-------------|-------------|-------------|
| C | -3.48037300 | -1.21647000 | 0.00122100  |
| C | -4.16408300 | 0.00000500  | -0.00003300 |
| C | -1.27539300 | 0.00000000  | 0.00000300  |
| C | -2.03129300 | -1.24558000 | 0.00020000  |
| H | -5.25687000 | 0.00000600  | -0.00004600 |
| C | 0.09875400  | 2.45732200  | 0.00027000  |
| C | -1.30963700 | -2.44849300 | -0.00028400 |
| C | 0.09874600  | -2.45732400 | -0.00022500 |
| H | 0.62800800  | 3.41285300  | 0.00050200  |
| H | 0.62799700  | -3.41285700 | -0.00044400 |
| C | 0.89504100  | 1.29504200  | 0.00011800  |
| C | 0.18346100  | -0.00000200 | 0.00002300  |
| C | 0.89503800  | -1.29504600 | -0.00005400 |
| C | -2.03128900 | 1.24558400  | -0.00021200 |

|   |             |             |             |
|---|-------------|-------------|-------------|
| C | -1.30963100 | 2.44849400  | 0.00029100  |
| C | -3.48036900 | 1.21647700  | -0.00126900 |
| H | -1.85489900 | 3.39504400  | 0.00020000  |
| H | -4.02025100 | 2.16385300  | -0.00120400 |
| H | -4.02025700 | -2.16384500 | 0.00114600  |
| H | -1.85490900 | -3.39504100 | -0.00020600 |
| O | 2.21542000  | -1.41608400 | -0.00015200 |
| O | 2.21542300  | 1.41606700  | 0.00025900  |
| K | 4.30371600  | 0.00000400  | -0.00005700 |

**PLY(O,O)-K<sub>3</sub>[18-crown-6]<sub>3</sub> (3)**

0 1

|   |            |             |             |
|---|------------|-------------|-------------|
| K | 3.03158900 | -1.67518800 | 0.00127100  |
| K | 2.19977200 | 2.29567700  | -0.04062900 |
| O | 1.69575700 | -0.00752800 | 1.42550400  |
| O | 2.47790400 | -3.36118800 | 2.53058300  |
| O | 1.18038800 | 3.67343200  | -2.34063900 |
| O | 2.45026000 | -3.41515100 | -2.46114400 |
| O | 4.84925600 | -1.85236000 | -2.43446700 |
| O | 6.34138100 | -2.21195500 | -0.01236400 |
| O | 0.22447300 | 4.83794500  | 0.04203200  |
| O | 1.58210300 | -0.06378300 | -1.41044300 |
| O | 1.06967000 | -3.86635000 | 0.05247000  |



|   |             |             |             |
|---|-------------|-------------|-------------|
| O | 4.92213900  | -1.87418000 | 2.44728300  |
| O | 1.40939600  | 3.70453700  | 2.33499000  |
| O | 4.08442200  | 2.78032400  | 2.31858400  |
| O | 5.25110900  | 1.86570400  | -0.18738800 |
| O | 3.84520200  | 2.76097100  | -2.57578100 |
| C | -1.66211300 | 1.06390800  | 0.11973000  |
| C | 0.30878200  | 0.27751000  | -1.24507900 |
| C | -2.39324800 | 1.36860900  | -1.10199000 |
| C | -0.32075400 | 0.51658900  | 2.52974700  |
| H | 0.20982400  | 0.33524500  | 3.46540400  |
| C | -0.30971200 | 0.52873600  | 0.07403700  |
| C | 1.06930600  | -3.70194800 | -2.31902300 |
| H | 0.68792100  | -4.19849900 | -3.22873900 |
| H | 0.49864800  | -2.77637400 | -2.15985600 |
| C | -2.31190300 | 1.35851800  | 1.38633100  |
| C | -1.62712500 | 1.02809100  | 2.56398900  |
| H | -2.09432100 | 1.24919900  | 3.52591800  |
| C | 0.40651800  | 0.30770300  | 1.34524700  |
| C | 0.88610100  | -4.62505300 | -1.12976100 |
| H | -0.12728400 | -5.05953000 | -1.15236500 |
| H | 1.61221100  | -5.45235600 | -1.17949300 |
| C | -0.60736500 | 4.65782000  | -1.09702200 |
| H | -1.37506500 | 5.44998700  | -1.14062600 |

|   |             |             |             |
|---|-------------|-------------|-------------|
| H | -1.11967000 | 3.68820300  | -1.05540100 |
| C | -0.50071600 | 0.48113400  | -2.37578900 |
| H | -0.04440000 | 0.27321800  | -3.34465300 |
| C | 4.95415800  | 1.88492900  | -2.55684800 |
| H | 5.52157100  | 1.96365100  | -3.50193900 |
| H | 4.63442400  | 0.83970200  | -2.43609700 |
| C | 1.09122100  | -3.63136700 | 2.41693900  |
| H | 0.52726300  | -2.70435600 | 2.23805800  |
| H | 0.71622200  | -4.09705400 | 3.34552700  |
| C | 1.80089900  | 3.45639400  | -3.59022500 |
| H | 2.31133800  | 4.37315700  | -3.93208400 |
| H | 1.05067900  | 3.17693300  | -4.34827100 |
| C | 0.88579100  | -4.58776800 | 1.25832200  |
| H | 1.60262100  | -5.42164700 | 1.32698200  |
| H | -0.13297900 | -5.00773100 | 1.30071400  |
| C | 6.26523600  | -2.31185900 | 2.38518100  |
| H | 6.30781600  | -3.41149500 | 2.33529200  |
| H | 6.82496900  | -1.99185400 | 3.28073200  |
| C | 0.46861200  | 4.76017900  | 2.42108300  |
| H | 0.98952200  | 5.73238700  | 2.42039600  |
| H | -0.11148400 | 4.68067300  | 3.35461100  |
| C | 2.70068900  | -2.36162200 | -3.39255100 |
| H | 2.21928100  | -2.58795500 | -4.35984300 |

|   |             |             |             |
|---|-------------|-------------|-------------|
| C | -0.49350800 | 4.66486800  | 1.25704500  |
| H | -1.26026700 | 5.45167800  | 1.36521700  |
| C | 2.80426000  | 2.33029300  | -3.45683200 |
| H | 2.32743800  | 1.42437200  | -3.05092300 |
| H | 3.22153100  | 2.11518300  | -4.45578900 |
| C | 2.76612000  | -2.29313300 | 3.43416700  |
| H | 2.28501200  | -2.48044900 | 4.40974400  |
| C | -1.80019300 | 1.01641200  | -2.32277100 |
| H | -2.32673800 | 1.24815200  | -3.25079000 |
| C | 0.23910000  | 4.73241700  | -2.34904500 |
| H | -0.42889300 | 4.64358300  | -3.22084100 |
| H | 0.76169700  | 5.70170500  | -2.41210200 |
| C | 6.86874700  | -1.59423100 | -1.17282900 |
| H | 7.95901700  | -1.75636900 | -1.23408000 |
| H | 6.68579500  | -0.51022000 | -1.13595300 |
| C | 2.15436200  | 3.50856000  | 3.51832900  |
| H | 1.48478800  | 3.24932500  | 4.35515500  |
| H | 2.70152100  | 4.42838500  | 3.78746200  |
| C | 5.97277700  | 2.26373100  | 0.96755700  |
| H | 6.14587100  | 3.35115200  | 0.95773600  |
| H | 6.95671200  | 1.76416900  | 0.99369000  |
| C | 4.26393400  | -2.27625500 | 3.64663300  |
| H | 4.52101000  | -1.58485200 | 4.46531200  |

|   |             |             |             |
|---|-------------|-------------|-------------|
| H | 4.59689100  | -3.28575900 | 3.93170600  |
| C | -3.60712300 | 2.00958300  | 1.40218000  |
| H | -4.01208200 | 2.33071500  | 2.36101800  |
| C | 4.19539700  | -2.30114600 | -3.61861200 |
| H | 4.56057400  | -3.30467300 | -3.88568800 |
| H | 4.42133500  | -1.61896000 | -4.45429500 |
| C | 3.13158800  | 2.37212700  | 3.30447000  |
| H | 3.64412400  | 2.16741000  | 4.26030000  |
| H | 2.60843100  | 1.46604000  | 2.95997100  |
| C | 5.17589800  | 1.89011800  | 2.20202500  |
| H | 4.83273000  | 0.84818800  | 2.12461400  |
| H | 5.83083300  | 1.96776600  | 3.08896300  |
| C | 6.22434900  | -2.18070200 | -2.41034800 |
| H | 6.74025000  | -1.77135600 | -3.29605900 |
| H | 6.35671100  | -3.27426600 | -2.41829500 |
| C | -4.20699700 | 2.40886700  | 0.20777500  |
| H | -5.13460800 | 2.98595400  | 0.24337700  |
| C | -3.66370600 | 2.06411700  | -1.02880200 |
| H | -4.12724700 | 2.39255400  | -1.95809000 |
| C | 6.93845100  | -1.71175600 | 1.17011000  |
| H | 6.84966500  | -0.61545600 | 1.20653800  |
| H | 8.01265100  | -1.96518800 | 1.19549100  |
| C | 5.85671600  | 2.27624600  | -1.40356100 |

|   |             |             |             |
|---|-------------|-------------|-------------|
| H | 6.84200100  | 1.79314000  | -1.52187100 |
| H | 6.01090200  | 3.36650400  | -1.40805500 |
| H | 2.29957800  | -1.41324900 | -2.99698900 |
| H | 2.39353300  | -1.34246800 | 3.01669000  |
| H | -0.99855600 | 3.69038100  | 1.27513400  |
| K | -4.94294900 | -0.47473000 | -0.00290400 |
| O | -5.96480600 | -0.67255800 | -2.77126300 |
| O | -7.14433100 | 0.10811400  | 1.89552800  |
| O | -5.07840400 | -1.67362800 | 2.75669500  |
| O | -3.90431000 | -2.46435200 | -1.95564600 |
| O | -7.87944900 | 0.17602600  | -0.84398200 |
| O | -3.21598800 | -2.48163900 | 0.78670600  |
| C | -7.08347600 | -0.45632300 | 3.19498000  |
| H | -7.55823600 | 0.21934700  | 3.92578300  |
| C | -3.95939800 | -1.87901900 | -3.24942800 |
| H | -3.49986900 | -2.55318000 | -3.99297800 |
| H | -3.40885200 | -0.92733700 | -3.25733300 |
| C | -7.77853700 | 0.73932600  | -2.14293500 |
| H | -7.07254500 | 1.58383800  | -2.14164500 |
| H | -8.76249600 | 1.10677600  | -2.47927900 |
| C | -5.63161300 | -0.65634400 | 3.57566000  |
| H | -5.08166200 | 0.28662400  | 3.43994100  |
| H | -5.57808800 | -0.94629800 | 4.63891500  |

|   |             |             |             |
|---|-------------|-------------|-------------|
| C | -8.38958100 | 1.08561600  | 0.11681100  |
| H | -9.40066100 | 1.42077600  | -0.16967000 |
| H | -7.74027400 | 1.97140000  | 0.19245900  |
| C | -8.45928000 | 0.39055700  | 1.46061800  |
| H | -8.97047000 | 1.05365300  | 2.17872400  |
| H | -9.04855900 | -0.53691300 | 1.37372200  |
| C | -2.56162500 | -2.64328800 | -1.50954000 |
| H | -2.03469000 | -1.68103100 | -1.45847200 |
| H | -2.01943400 | -3.29353700 | -2.21733500 |
| C | -5.40775100 | -1.65781600 | -3.62655900 |
| H | -5.45771100 | -1.32403600 | -4.67633900 |
| H | -5.97267800 | -2.60028100 | -3.53944300 |
| C | -2.57445100 | -3.32040200 | -0.15703900 |
| H | -3.09660900 | -4.29059200 | -0.21805000 |
| H | -1.53145400 | -3.49534500 | 0.14256500  |
| C | -7.29511500 | -0.32851400 | -3.10148600 |
| H | -7.95290800 | -1.21086400 | -3.03836600 |
| H | -7.34878600 | 0.06355800  | -4.13116900 |
| C | -3.19203800 | -2.99015100 | 2.10767000  |
| H | -3.80815600 | -3.90273700 | 2.17686000  |
| C | -3.70615600 | -1.92728300 | 3.05338200  |
| H | -3.60582900 | -2.29200700 | 4.08988700  |
| H | -3.10472100 | -1.01300100 | 2.93978200  |

|   |             |             |            |
|---|-------------|-------------|------------|
| H | -7.61730200 | -1.41997600 | 3.22109800 |
| H | -2.16170600 | -3.24579800 | 2.40104100 |

**PLY-K<sub>2</sub>[18-crown-6]<sub>2</sub> (2)**

0 2

|   |             |             |             |
|---|-------------|-------------|-------------|
| K | -1.96080100 | 1.06325400  | -0.00068400 |
| K | 0.98348200  | -1.96285600 | 0.00082700  |
| O | 0.09078700  | 0.16983900  | 1.41750400  |
| O | -2.16800900 | 2.82229000  | 2.46063800  |
| O | 2.55270600  | -2.30616300 | -2.36356100 |
| O | -2.16908100 | 2.81718000  | -2.46530400 |
| O | -3.57129900 | 0.28599400  | -2.44467400 |
| O | -4.91755800 | -0.29676300 | 0.00121900  |
| O | 4.07786500  | -2.30797900 | 0.00325300  |
| O | 0.09130600  | 0.16898000  | -1.41776100 |
| O | -1.18274100 | 3.84400700  | -0.00360300 |
| O | -3.57251600 | 0.29248300  | 2.44593500  |
| O | 2.54886300  | -2.30617600 | 2.36766300  |
| O | -0.13215700 | -3.31157100 | 2.46201000  |
| O | -1.67156000 | -3.27492700 | -0.00124600 |
| O | -0.12781900 | -3.31269300 | -2.46195300 |
| C | 3.02817600  | 1.98453100  | -0.00015600 |
| C | 1.19332900  | 0.86143600  | -1.28912200 |

|   |             |             |             |
|---|-------------|-------------|-------------|
| C | 3.66753800  | 2.37675300  | -1.23074900 |
| C | 1.87778400  | 1.28086100  | 2.46692800  |
| H | 1.42493800  | 0.99433900  | 3.41492900  |
| C | 1.79430700  | 1.22734900  | -0.00015200 |
| C | -1.05115600 | 3.69535900  | -2.37840200 |
| H | -0.97711300 | 4.30399400  | -3.29574700 |
| H | -0.11774300 | 3.12876200  | -2.26238100 |
| C | 3.66724400  | 2.37725300  | 1.23043400  |
| C | 3.05610500  | 2.00406200  | 2.45073700  |
| H | 3.53104600  | 2.29900700  | 3.38608900  |
| C | 1.19296500  | 0.86205800  | 1.28882900  |
| C | -1.24389200 | 4.61393400  | -1.19086300 |
| H | -0.44599900 | 5.37405200  | -1.19692900 |
| H | -2.21424600 | 5.13301800  | -1.26263400 |
| C | 4.51527700  | -1.65068900 | -1.17890800 |
| H | 5.61711400  | -1.64936900 | -1.23234200 |
| H | 4.16740000  | -0.60885900 | -1.19477400 |
| C | 1.87840200  | 1.27982800  | -2.46722700 |
| H | 1.42582500  | 0.99288400  | -3.41523400 |
| C | -1.53547700 | -3.17802500 | -2.38596400 |
| H | -2.00731100 | -3.58183200 | -3.29930200 |
| H | -1.82291900 | -2.12040700 | -2.29038400 |
| C | -1.04954700 | 3.69954300  | 2.37138300  |



|   |             |             |             |
|---|-------------|-------------|-------------|
| H | -0.11658500 | 3.13212000  | 2.25577500  |
| H | -0.97445300 | 4.30979700  | 3.28756500  |
| C | 1.93110200  | -2.75270000 | -3.55201700 |
| H | 2.10781000  | -3.83077400 | -3.70343900 |
| H | 2.33944500  | -2.21383300 | -4.42307000 |
| C | -1.24259000 | 4.61609100  | 1.18233000  |
| H | -2.21261000 | 5.13582600  | 1.25389100  |
| H | -0.44427800 | 5.37578100  | 1.18643300  |
| C | -4.90474200 | -0.17711100 | 2.39266000  |
| H | -5.60906600 | 0.66824700  | 2.33875500  |
| H | -5.14920000 | -0.76417000 | 3.29465100  |
| C | 3.96284600  | -2.39217100 | 2.38653200  |
| H | 4.28330800  | -3.44680600 | 2.36877700  |
| H | 4.36252600  | -1.92518600 | 3.30103800  |
| C | -1.99616700 | 1.80104800  | -3.44715500 |
| H | -1.73160100 | 2.24988500  | -4.41964900 |
| C | 4.51351100  | -1.65107400 | 1.18627400  |
| H | 5.61526300  | -1.65003000 | 1.24148900  |
| C | 0.44564000  | -2.47155800 | -3.46360900 |
| H | 0.27846900  | -1.41867200 | -3.19518800 |
| H | -0.01448500 | -2.68751300 | -4.44296400 |
| C | -1.99542500 | 1.80802000  | 3.44447100  |
| H | -1.72983200 | 2.25859800  | 4.41587500  |

|   |             |             |             |
|---|-------------|-------------|-------------|
| C | 3.05669100  | 2.00306700  | -2.45104700 |
| H | 3.53185300  | 2.29763900  | -3.38640400 |
| C | 3.96674700  | -2.39165100 | -2.38022100 |
| H | 4.36770100  | -1.92429400 | -3.29397800 |
| H | 4.28753900  | -3.44618300 | -2.36222700 |
| C | -5.07445300 | -1.07075400 | -1.17454300 |
| H | -6.07878400 | -1.52687800 | -1.20438600 |
| H | -4.33092600 | -1.88271100 | -1.19684500 |
| C | 1.92516300  | -2.75206800 | 3.55526400  |
| H | 2.33234900  | -2.21310900 | 4.42679700  |
| H | 2.10112900  | -3.83017300 | 3.70731000  |
| C | -2.04109700 | -3.95830200 | 1.18584200  |
| H | -1.61053600 | -4.97189100 | 1.19732600  |
| H | -3.13883300 | -4.05519600 | 1.24423900  |
| C | -3.31128200 | 1.07767700  | 3.60561700  |
| H | -3.27072800 | 0.42823600  | 4.49564100  |
| H | -4.11965700 | 1.81055400  | 3.75139100  |
| C | 4.87955900  | 3.11964200  | 1.20402700  |
| H | 5.33412900  | 3.40220600  | 2.15172300  |
| C | -3.31138600 | 1.06907500  | -3.60609700 |
| H | -4.12060100 | 1.80080400  | -3.75298400 |
| H | -3.27059200 | 0.41784200  | -4.49479500 |
| C | 0.43997100  | -2.47027900 | 3.46431900  |

|   |             |             |             |
|---|-------------|-------------|-------------|
| H | -0.02188900 | -2.68567700 | 4.44297400  |
| H | 0.27372900  | -1.41741100 | 3.19520400  |
| C | -1.53963400 | -3.17657800 | 2.38370500  |
| H | -1.82664200 | -2.11890700 | 2.28730200  |
| H | -2.01306700 | -3.57987500 | 3.29645100  |
| C | -4.90265400 | -0.18600900 | -2.39063700 |
| H | -5.14528200 | -0.77678300 | -3.29069600 |
| H | -5.60864600 | 0.65817200  | -2.34032700 |
| C | 5.47312600  | 3.48267400  | -0.00016800 |
| H | 6.40046400  | 4.05257900  | -0.00017100 |
| C | 4.87984900  | 3.11915300  | -1.20435600 |
| H | 5.33464400  | 3.40133100  | -2.15205900 |
| C | -5.07720700 | -1.06601400 | 1.17970400  |
| H | -4.33535100 | -1.87939200 | 1.20595700  |
| H | -6.08245500 | -1.52007000 | 1.21016600  |
| C | -2.03865400 | -3.95930800 | -1.18854400 |
| H | -3.13622800 | -4.05677900 | -1.24881500 |
| H | -1.60754200 | -4.97267300 | -1.19856800 |
| H | -1.19913600 | 1.10955700  | -3.13598100 |
| H | -1.19924200 | 1.11510700  | 3.13428800  |
| H | 4.16583800  | -0.60917200 | 1.20184700  |

**PLY(O,O)-K (1a; for top ring, NICS)**

0 1

|    |            |             |             |
|----|------------|-------------|-------------|
| C  | 0.56941300 | 0.45180900  | -0.09782000 |
| C  | 0.56039700 | 1.63751900  | -0.82348700 |
| C  | 0.58647000 | -0.87502400 | -2.16480600 |
| C  | 0.58228200 | -0.79464600 | -0.73771300 |
| H  | 0.55046100 | 2.59356300  | -0.31330900 |
| Bq | 0.56264000 | 0.42307900  | -1.51333300 |
| Bq | 1.56255000 | 0.43652200  | -1.51158500 |
| C  | 0.59381600 | -0.88053000 | -4.98113500 |
| C  | 0.59114300 | -2.01330200 | 0.01459800  |
| C  | 0.60331200 | -3.21808200 | -0.60150100 |
| H  | 0.59719200 | -0.93087900 | -6.06429900 |
| H  | 0.61000400 | -4.14595100 | -0.04046300 |
| C  | 0.60351500 | -2.16508200 | -4.29463400 |
| C  | 0.59949100 | -2.13896700 | -2.83922700 |
| C  | 0.60845200 | -3.36223500 | -2.05068600 |
| C  | 0.57723800 | 0.35550000  | -2.89210500 |
| C  | 0.58142900 | 0.30188900  | -4.32332900 |
| C  | 0.56440700 | 1.58061100  | -2.21266400 |
| H  | 0.57454900 | 1.23834800  | -4.87431400 |
| H  | 0.55758300 | 2.49741900  | -2.79413200 |
| H  | 0.56690000 | 0.47859600  | 0.98751300  |

|   |            |             |             |
|---|------------|-------------|-------------|
| H | 0.58790800 | -1.94955300 | 1.09923900  |
| O | 0.62038000 | -4.53213200 | -2.52393500 |
| O | 0.61466900 | -3.20879500 | -5.00394400 |
| K | 0.63542600 | -5.60453700 | -4.68753600 |

**[PLY(O,O)-K]<sup>-1</sup> (for top ring, NICS)**

-1 2

|    |            |             |             |
|----|------------|-------------|-------------|
| C  | 0.56440400 | 0.46132900  | -0.09064400 |
| C  | 0.56055100 | 1.64571300  | -0.81948600 |
| C  | 0.58651300 | -0.87311200 | -2.16373300 |
| C  | 0.58018800 | -0.79145200 | -0.73109900 |
| H  | 0.55066600 | 2.60333800  | -0.30832100 |
| Bq | 0.56214000 | 0.42869400  | -1.51019800 |
| Bq | 1.56205500 | 0.44131600  | -1.50631200 |
| C  | 0.59649300 | -0.88552800 | -4.97809800 |
| C  | 0.58416500 | -2.00830000 | 0.01449400  |
| C  | 0.60101600 | -3.21804300 | -0.60749100 |
| H  | 0.60124200 | -0.93556000 | -6.06229000 |
| H  | 0.60649700 | -4.14664300 | -0.04564400 |
| C  | 0.58297600 | -2.16848400 | -4.29876200 |
| C  | 0.59945000 | -2.13682700 | -2.83821400 |
| C  | 0.62885500 | -3.36739900 | -2.05128700 |
| C  | 0.57932400 | 0.36257700  | -2.89331400 |

|   |            |             |             |
|---|------------|-------------|-------------|
| C | 0.58864800 | 0.30462900  | -4.31922000 |
| C | 0.56949800 | 1.59209500  | -2.20911500 |
| H | 0.59034400 | 1.24090400  | -4.87313900 |
| H | 0.56705000 | 2.50940000  | -2.79160600 |
| H | 0.55716700 | 0.48799300  | 0.99564100  |
| H | 0.57235000 | -1.94741600 | 1.10057900  |
| O | 0.68704700 | -4.53532800 | -2.52911600 |
| O | 0.54776300 | -3.21631400 | -5.00347600 |
| K | 0.63522500 | -5.67244100 | -4.72475700 |

#### 4-Chlorobenzonitrile

0 1

|   |             |             |             |
|---|-------------|-------------|-------------|
| C | 0.57953000  | -1.21996100 | 0.00000700  |
| C | -0.81336300 | -1.21928200 | -0.00002600 |
| C | -1.51452300 | -0.00004300 | 0.00000200  |
| C | -0.81336000 | 1.21924900  | -0.00001000 |
| C | 0.57949600  | 1.21994000  | -0.00000600 |
| C | 1.26034800  | -0.00002400 | 0.00002700  |
| H | 1.12692100  | -2.15623000 | 0.00002100  |
| H | -1.35406300 | -2.15990200 | -0.00002000 |
| H | -1.35412500 | 2.15983100  | -0.00000600 |
| H | 1.12692900  | 2.15618400  | 0.00000100  |
| C | -2.94820400 | -0.00000200 | 0.00001200  |

|    |             |            |             |
|----|-------------|------------|-------------|
| N  | -4.11292300 | 0.00005200 | 0.00000200  |
| Cl | 3.01560300  | 0.00002900 | -0.00000300 |

### **Chlorobenzene**

0 1

|    |             |             |             |
|----|-------------|-------------|-------------|
| C  | 0.17802600  | -1.21894300 | -0.00001200 |
| C  | 1.57687400  | -1.20995700 | 0.00002700  |
| C  | 2.27813000  | 0.00000300  | -0.00001700 |
| C  | 1.57685900  | 1.20996300  | 0.00000800  |
| C  | 0.17802300  | 1.21894400  | 0.00000700  |
| C  | -0.50150900 | -0.00000900 | -0.00004000 |
| H  | -0.37164800 | -2.15473200 | 0.00000000  |
| H  | 2.11410400  | -2.15444200 | 0.00003200  |
| H  | 2.11410000  | 2.15444400  | 0.00001100  |
| H  | -0.37168100 | 2.15471400  | 0.00002300  |
| Cl | -2.26869100 | 0.00000000  | 0.00000600  |
| H  | 3.36445200  | 0.00001800  | -0.00001600 |

#### 4-CyanoMesitylBenzene radical anion (Pdt<sup>-</sup>)

-1 2

|   |             |             |             |
|---|-------------|-------------|-------------|
| C | -2.74820900 | 0.84621900  | -0.88988900 |
| C | -1.36907600 | 0.84024400  | -0.87517600 |
| C | -0.60719900 | 0.00166700  | -0.00051000 |
| C | -1.36491700 | -0.83848300 | 0.87635000  |
| C | -2.74395400 | -0.84665000 | 0.89563000  |
| C | -3.50571800 | -0.00080900 | 0.00413000  |
| H | -3.27963300 | 1.48784500  | -1.58966400 |
| H | -0.84366800 | 1.48075100  | -1.58072400 |
| H | -0.83599700 | -1.47824600 | 1.58000200  |
| H | -3.27206300 | -1.48912200 | 1.59714200  |
| C | -4.90038600 | -0.00200200 | 0.00635300  |
| N | -6.08768600 | -0.00291700 | 0.00827100  |
| C | 0.87271400  | 0.00160000  | -0.00266200 |
| C | 1.61149700  | 1.21064300  | 0.16722500  |
| C | 1.60974800  | -1.20796800 | -0.17899300 |
| C | 3.01210600  | 1.18455200  | 0.15655300  |
| C | 3.01021400  | -1.18338400 | -0.17398500 |
| C | 3.74084000  | -0.00019700 | -0.00648200 |
| H | 3.55158100  | 2.12054500  | 0.30088500  |
| H | 3.54846900  | -2.11840800 | -0.32919400 |
| C | 0.92218200  | -2.53368700 | -0.43824100 |



|   |            |             |             |
|---|------------|-------------|-------------|
| H | 0.52958700 | -2.99250400 | 0.47841000  |
| H | 0.07018900 | -2.41623600 | -1.11738300 |
| H | 1.62367400 | -3.24839800 | -0.88283400 |
| C | 5.25300800 | -0.00685900 | 0.02719900  |
| H | 5.63363300 | -0.15342800 | 1.04837800  |
| H | 5.66385900 | -0.81622100 | -0.58783200 |
| H | 5.66754200 | 0.94002100  | -0.33794300 |
| C | 0.92671000 | 2.53955300  | 0.41749900  |
| H | 0.53627000 | 2.99393900  | -0.50231400 |
| H | 0.07376800 | 2.42794900  | 1.09636900  |
| H | 1.62921700 | 3.25529600  | 0.85879900  |

## **Int2**

-1 2

|   |             |             |             |
|---|-------------|-------------|-------------|
| C | -0.62911400 | -0.22268600 | -1.21679600 |
| C | 0.11857600  | -0.27929800 | 0.00009600  |
| C | -0.62906900 | -0.22150500 | 1.21695700  |
| C | -2.00527200 | -0.11957900 | 1.23495300  |
| C | -2.76421400 | -0.06404200 | 0.00005000  |
| C | -2.00531600 | -0.12074600 | -1.23482600 |
| H | -0.09304200 | -0.26597200 | -2.16438000 |
| H | -0.09296600 | -0.26387800 | 2.16456400  |
| H | -2.53517900 | -0.08304500 | 2.18442300  |

|   |             |             |             |
|---|-------------|-------------|-------------|
| H | -2.53526100 | -0.08511700 | -2.18430900 |
| C | 1.59111800  | -0.39559400 | 0.00013700  |
| C | 2.41644100  | -1.51654900 | 0.00022400  |
| C | 3.77232900  | -1.07707400 | 0.00047200  |
| H | 2.06447100  | -2.54143900 | 0.00034600  |
| C | 3.74469400  | 0.30647400  | 0.00009100  |
| H | 4.66231600  | -1.69458000 | 0.00077200  |
| H | 4.54738200  | 1.03205400  | 0.00001700  |
| N | 2.43058000  | 0.71494200  | -0.00023000 |
| C | 1.99001300  | 2.10381000  | -0.00083200 |
| H | 1.38996900  | 2.32157600  | -0.88975300 |
| H | 1.39010600  | 2.32240600  | 0.88797800  |
| H | 2.87081200  | 2.74933300  | -0.00120300 |
| C | -4.15241700 | 0.03987100  | 0.00002300  |
| N | -5.33846900 | 0.12936700  | -0.00002000 |

### **Int1**

0 2

|   |            |             |             |
|---|------------|-------------|-------------|
| C | 1.57953200 | -0.19704800 | 0.66083200  |
| C | 2.18774100 | -1.55153800 | 0.36510300  |
| C | 3.30054400 | -1.37421400 | -0.43940600 |
| C | 3.44041200 | -0.01747600 | -0.73191700 |
| N | 2.37259700 | 0.69724000  | -0.20314000 |

|   |             |             |             |
|---|-------------|-------------|-------------|
| H | 1.74328200  | 0.08388900  | 1.72338100  |
| H | 1.79080800  | -2.47680700 | 0.76028300  |
| H | 3.95248800  | -2.15507300 | -0.81198300 |
| H | 4.18343600  | 0.48542300  | -1.33654900 |
| C | 2.45957100  | 2.10455900  | 0.12628000  |
| H | 3.01318500  | 2.62859000  | -0.65857700 |
| H | 1.45446700  | 2.53552000  | 0.17971800  |
| H | 2.96687600  | 2.28450700  | 1.08928500  |
| C | 0.07899700  | -0.10609300 | 0.39760000  |
| C | -0.82759800 | -0.07901800 | 1.46271900  |
| C | -0.41448700 | -0.08984300 | -0.91441800 |
| C | -2.20092600 | -0.04315600 | 1.23426800  |
| H | -0.45504100 | -0.08410600 | 2.48447700  |
| C | -1.78143500 | -0.04603300 | -1.15898900 |
| H | 0.28784800  | -0.10535900 | -1.74209500 |
| C | -2.68677500 | -0.02497600 | -0.08224200 |
| H | -2.89892100 | -0.02139200 | 2.06516800  |
| H | -2.15986200 | -0.02955800 | -2.17621800 |
| C | -4.09852700 | 0.02008800  | -0.32863800 |
| N | -5.24414900 | 0.05745300  | -0.52886700 |

## TS1

0 2

|   |             |             |             |
|---|-------------|-------------|-------------|
| C | 2.24249300  | 0.41051000  | 0.86138100  |
| C | 2.63008300  | -0.87147300 | 1.27533300  |
| C | 3.21527500  | -1.51526000 | 0.16519900  |
| C | 3.22791700  | -0.60304400 | -0.87997100 |
| N | 2.68428600  | 0.57775900  | -0.44053500 |
| H | 2.00496600  | 1.27619500  | 1.46335700  |
| H | 2.47714800  | -1.28060400 | 2.26453100  |
| H | 3.60313800  | -2.52419100 | 0.12583600  |
| H | 3.57609500  | -0.70254700 | -1.89872900 |
| C | -0.10075700 | 0.18674600  | 0.54196300  |
| C | -0.98346400 | 1.14344000  | 1.02013100  |
| C | -0.51368000 | -0.90614700 | -0.20463100 |
| C | -2.34531600 | 1.00594800  | 0.73592900  |
| H | -0.64158800 | 1.99267400  | 1.60942800  |
| C | -1.87232300 | -1.04728500 | -0.49576100 |
| H | 0.20245700  | -1.64610200 | -0.55436600 |
| C | -2.79028700 | -0.08981200 | -0.02483600 |
| H | -3.06515400 | 1.73622500  | 1.09520300  |
| H | -2.23190700 | -1.89038900 | -1.07918200 |
| C | 2.39668400  | 1.73614800  | -1.26551200 |
| H | 2.61078100  | 2.65380400  | -0.70914200 |

|   |             |             |             |
|---|-------------|-------------|-------------|
| H | 3.03375900  | 1.71329700  | -2.15262100 |
| H | 1.34512900  | 1.74718700  | -1.57508100 |
| C | -4.18597600 | -0.23212500 | -0.32172800 |
| N | -5.31838700 | -0.34653500 | -0.56435300 |

**'BuOH**

0 1

|   |             |             |             |
|---|-------------|-------------|-------------|
| O | 0.01325900  | -0.00017600 | 1.45215900  |
| H | 0.94382400  | 0.00188400  | 1.72867200  |
| C | -0.00533400 | -0.00001600 | 0.01400900  |
| C | 0.69430700  | -1.26338700 | -0.50999500 |
| H | 0.65905500  | -1.31910400 | -1.60428400 |
| H | 1.75131900  | -1.27513800 | -0.21193800 |
| H | 0.21574400  | -2.15905100 | -0.10037200 |
| C | -1.49012900 | -0.00419400 | -0.35745000 |
| H | -1.98611800 | 0.88091600  | 0.05430700  |
| H | -1.62211800 | -0.00462500 | -1.44478600 |
| H | -1.98114600 | -0.89201700 | 0.05438900  |
| C | 0.68697600  | 1.26752000  | -0.50959700 |
| H | 0.65116800  | 1.32353100  | -1.60385100 |
| H | 0.20331300  | 2.16021000  | -0.09948100 |
| H | 1.74396800  | 1.28526900  | -0.21172500 |

**'BuO'**

-1 1

|   |             |             |             |
|---|-------------|-------------|-------------|
| O | 0.00002100  | -0.00001500 | 1.48405900  |
| C | -0.00001900 | -0.00001400 | 0.15973500  |
| C | 0.98745900  | -1.07958200 | -0.43683100 |
| H | 1.03488000  | -1.12999600 | -1.54099900 |
| H | 1.99851200  | -0.87484300 | -0.05674500 |
| H | 0.69248300  | -2.06872400 | -0.05840000 |
| C | -1.42876900 | -0.31528600 | -0.43680100 |
| H | -2.13792600 | 0.43442000  | -0.05777900 |
| H | -1.49634500 | -0.33050300 | -1.54097200 |
| H | -1.75680100 | -1.29353000 | -0.05727100 |
| C | 0.44130800  | 1.39489000  | -0.43680800 |
| H | 0.46209000  | 1.46086000  | -1.54097700 |
| H | 1.44505800  | 1.63430400  | -0.05761000 |
| H | -0.24199100 | 2.16808900  | -0.05749100 |

**TS2**

-1 2

|   |            |            |             |
|---|------------|------------|-------------|
| C | 0.41840600 | 1.06216600 | -0.18479600 |
| C | 0.84987100 | 1.82173900 | -1.37429400 |
| C | 1.67660300 | 2.87338200 | -0.97589700 |
| C | 1.72593900 | 2.89024800 | 0.41332200  |

|   |             |             |             |
|---|-------------|-------------|-------------|
| N | 0.88227600  | 1.92588600  | 0.93116000  |
| H | 1.11242200  | -0.00459500 | -0.01659700 |
| H | 0.63825000  | 1.51248800  | -2.39089000 |
| H | 2.20026300  | 3.56877000  | -1.62358600 |
| H | 2.30545000  | 3.51870600  | 1.07840100  |
| C | 1.06318500  | 1.37445800  | 2.26194700  |
| H | 1.50663800  | 2.14161000  | 2.90753700  |
| H | 0.09019900  | 1.09392000  | 2.68487300  |
| H | 1.69986000  | 0.48017200  | 2.23008100  |
| C | -1.00015100 | 0.57127100  | -0.09512500 |
| C | -1.31955100 | -0.56486900 | 0.68564100  |
| C | -2.03681100 | 1.14714400  | -0.86303200 |
| C | -2.61017400 | -1.06783500 | 0.73214800  |
| H | -0.50902400 | -1.07673800 | 1.19731700  |
| C | -3.33122500 | 0.65224800  | -0.82895200 |
| H | -1.80365600 | 2.01405000  | -1.47647600 |
| C | -3.64595000 | -0.46477400 | -0.02256500 |
| H | -2.83592000 | -1.94211800 | 1.33718000  |
| H | -4.11894400 | 1.12840300  | -1.40794200 |
| O | 1.74630300  | -1.10417900 | 0.57052900  |
| C | 2.73221500  | -1.70409600 | -0.19662700 |
| C | 3.21369800  | -2.97154800 | 0.55056000  |
| H | 4.00902100  | -3.51069100 | 0.01319000  |

|   |             |             |             |
|---|-------------|-------------|-------------|
| H | 3.59176600  | -2.69084500 | 1.54135100  |
| H | 2.36813500  | -3.65444200 | 0.69796900  |
| C | 3.93792500  | -0.74924500 | -0.39676400 |
| H | 3.60882200  | 0.16539600  | -0.90366900 |
| H | 4.34237900  | -0.46056400 | 0.58153000  |
| H | 4.75000400  | -1.20122900 | -0.98722800 |
| C | 2.18118800  | -2.12013700 | -1.58530000 |
| H | 1.30393200  | -2.76445200 | -1.45186600 |
| H | 1.86227900  | -1.23168800 | -2.14378200 |
| H | 2.92141400  | -2.65931400 | -2.19593400 |
| C | -4.97434100 | -0.97616600 | 0.01908100  |
| N | -6.06780200 | -1.38836100 | 0.05858700  |

**TS1(Fur)**

0 2

|   |             |             |             |
|---|-------------|-------------|-------------|
| C | -2.47368700 | -0.52973800 | 0.77562400  |
| C | -3.40339500 | 1.06870500  | -0.42507500 |
| C | -3.48184000 | -0.06746500 | -1.18272100 |
| H | -2.19835000 | -0.94823300 | 1.73050400  |
| H | -3.69557200 | 2.09435300  | -0.58939400 |
| H | -3.89653700 | -0.14255100 | -2.17792400 |
| C | -0.10726300 | -0.29666100 | 0.40663800  |



|   |             |             |             |
|---|-------------|-------------|-------------|
| C | 0.38641900  | 0.99638700  | 0.33474000  |
| C | 0.68024000  | -1.42941200 | 0.26931500  |
| C | 1.75636100  | 1.17094400  | 0.10886300  |
| H | -0.26086300 | 1.86082000  | 0.45248300  |
| C | 2.05111700  | -1.26052200 | 0.04709700  |
| H | 0.26003700  | -2.42977400 | 0.32833600  |
| C | 2.58518400  | 0.04078500  | -0.03348500 |
| H | 2.18303900  | 2.16724900  | 0.04583100  |
| H | 2.70267100  | -2.12178100 | -0.06384900 |
| C | 3.98908400  | 0.21710800  | -0.26426800 |
| N | 5.13008300  | 0.36043700  | -0.45197600 |
| O | -2.82614200 | 0.79738700  | 0.78487300  |
| C | -2.91403300 | -1.11460700 | -0.39888700 |
| H | -2.80499600 | -2.15538500 | -0.66818900 |

### **TS2(Fur)**

-1 2

|   |             |             |             |
|---|-------------|-------------|-------------|
| C | -0.40002600 | 1.01518700  | -0.11070200 |
| C | -1.47341800 | 2.91700000  | 0.58973900  |
| C | -1.59783000 | 2.89714300  | -0.78969500 |
| H | -1.05481400 | -0.05151400 | 0.05369000  |
| H | -1.84406700 | 3.59832300  | 1.34185300  |

|   |             |             |             |
|---|-------------|-------------|-------------|
| H | -2.13435500 | 3.63539100  | -1.37320200 |
| C | 1.01970400  | 0.57404000  | -0.07297000 |
| C | 1.61424200  | -0.00002300 | -1.21990800 |
| C | 1.77822600  | 0.61052100  | 1.11696300  |
| C | 2.90380600  | -0.51148600 | -1.18542600 |
| H | 1.05775600  | -0.04411600 | -2.15079000 |
| C | 3.07175800  | 0.10487000  | 1.16291100  |
| H | 1.34421000  | 1.04867400  | 2.00835800  |
| C | 3.65057400  | -0.46626200 | 0.01118000  |
| H | 3.34322300  | -0.94232000 | -2.07950700 |
| H | 3.64164800  | 0.15117400  | 2.08563100  |
| O | -1.64144000 | -1.31081300 | 0.34006900  |
| C | -3.01528400 | -1.47680700 | 0.10711200  |
| C | -3.45334200 | -2.85648200 | 0.65055300  |
| H | -4.52255900 | -3.04613400 | 0.48536100  |
| H | -2.88349500 | -3.65275800 | 0.15667500  |
| H | -3.25719600 | -2.91732800 | 1.72775500  |
| C | -3.32373100 | -1.42114900 | -1.41023900 |
| H | -3.01736500 | -0.45288500 | -1.82251800 |
| H | -2.76412900 | -2.20572200 | -1.93414700 |
| H | -4.39183800 | -1.56193900 | -1.62362400 |
| C | -3.83587400 | -0.37716300 | 0.82567500  |
| H | -3.64442600 | -0.41126700 | 1.90517800  |

|   |             |             |             |
|---|-------------|-------------|-------------|
| H | -3.54406300 | 0.61444900  | 0.46197500  |
| H | -4.91579700 | -0.49712700 | 0.66650200  |
| C | 4.97943000  | -0.98602700 | 0.05261900  |
| N | 6.06666300  | -1.41003500 | 0.08619500  |
| O | -0.73273300 | 1.85482000  | 1.04379100  |
| C | -0.92287600 | 1.77691400  | -1.27445000 |
| H | -0.85812800 | 1.45163200  | -2.30359500 |

**TS1(Thio)**

0 2

|   |             |             |             |
|---|-------------|-------------|-------------|
| C | -2.12325300 | 0.90721300  | -0.44152500 |
| C | -3.47625500 | -0.93822800 | 0.57034500  |
| C | -3.16844900 | 0.05123000  | 1.47652500  |
| H | -1.81079100 | 1.65002200  | -1.16190500 |
| H | -4.00595500 | -1.86502600 | 0.74507200  |
| H | -3.45925600 | 0.00929000  | 2.52013900  |
| C | 0.19794700  | 0.39888700  | -0.32308300 |
| C | 1.07174100  | 1.47412600  | -0.37662100 |
| C | 0.60247300  | -0.90721800 | -0.09689700 |
| C | 2.43815200  | 1.22853900  | -0.20332200 |
| H | 0.72296300  | 2.48891000  | -0.54937400 |
| C | 1.96701400  | -1.15839700 | 0.07979400  |

|   |             |             |             |
|---|-------------|-------------|-------------|
| H | -0.11020400 | -1.72674400 | -0.06281900 |
| C | 2.88222700  | -0.08855400 | 0.02527700  |
| H | 3.15457600  | 2.04323700  | -0.24372800 |
| H | 2.32406000  | -2.16832800 | 0.25626800  |
| C | 4.28137900  | -0.34358900 | 0.20508400  |
| N | 5.41864100  | -0.55080800 | 0.35134800  |
| S | -2.87694600 | -0.56656400 | -1.01814000 |
| C | -2.43866300 | 1.12317800  | 0.89880900  |
| H | -2.12063100 | 2.00619400  | 1.44083300  |

**TS2(Thio)**

-1 2

|   |             |             |             |
|---|-------------|-------------|-------------|
| C | 0.35673600  | 0.94373600  | 0.20154200  |
| C | 1.79856900  | 3.04145800  | -0.40811100 |
| C | 1.59359800  | 2.89204000  | 0.96450200  |
| H | 0.99018200  | -0.12256700 | 0.26519600  |
| H | 2.39475700  | 3.79085200  | -0.91185000 |
| H | 2.04008700  | 3.56821200  | 1.68827900  |
| C | -1.07275000 | 0.50831600  | 0.12422900  |
| C | -1.92424000 | 0.56382100  | 1.24833200  |
| C | -1.59315300 | -0.06377200 | -1.05855900 |
| C | -3.22462200 | 0.07287800  | 1.20131600  |

|   |             |             |             |
|---|-------------|-------------|-------------|
| H | -1.56975600 | 1.00549400  | 2.17257700  |
| C | -2.89079300 | -0.55231300 | -1.12362300 |
| H | -0.96820600 | -0.12880600 | -1.94396700 |
| C | -3.72359300 | -0.49197800 | 0.01236900  |
| H | -3.86014500 | 0.13349200  | 2.07901200  |
| H | -3.26570400 | -0.98247100 | -2.04672900 |
| O | 1.52830000  | -1.46367300 | 0.45357200  |
| C | 2.84995500  | -1.78313500 | 0.11551200  |
| C | 3.27910900  | -3.05698100 | 0.88362600  |
| H | 4.30837600  | -3.35853100 | 0.64623400  |
| H | 3.21371200  | -2.88441200 | 1.96478600  |
| H | 2.61209100  | -3.89046000 | 0.63235900  |
| C | 3.81669000  | -0.63274300 | 0.49286200  |
| H | 3.54024700  | 0.28533900  | -0.03729400 |
| H | 3.76012000  | -0.43211000 | 1.56961700  |
| H | 4.85926200  | -0.87210700 | 0.24445400  |
| C | 2.97503700  | -2.06075000 | -1.40444500 |
| H | 2.30772500  | -2.88324600 | -1.68973200 |
| H | 2.68192100  | -1.17249000 | -1.97638800 |
| H | 3.99815100  | -2.33325900 | -1.69722300 |
| C | -5.06137700 | -0.99096100 | -0.04511600 |
| N | -6.15398600 | -1.39763500 | -0.09250400 |
| S | 0.96213400  | 1.81073100  | -1.34071700 |

|   |            |            |            |
|---|------------|------------|------------|
| C | 0.79276600 | 1.81795800 | 1.32200200 |
| H | 0.58294800 | 1.55275800 | 2.35246200 |

**TS1(Ben)**

0 2

|   |             |             |             |
|---|-------------|-------------|-------------|
| C | 0.12142000  | -0.45487900 | -0.39356100 |
| C | 0.49774700  | 0.87342700  | -0.26633600 |
| C | 1.01562500  | -1.51239200 | -0.31163800 |
| C | 1.84739600  | 1.16563800  | -0.04751700 |
| H | -0.22980300 | 1.67695100  | -0.33874600 |
| C | 2.36753300  | -1.22669100 | -0.09534900 |
| H | 0.69123400  | -2.54498200 | -0.41091000 |
| C | 2.78038300  | 0.11343200  | 0.03684700  |
| H | 2.17979600  | 2.19394900  | 0.05552100  |
| H | 3.09692800  | -2.02807600 | -0.02935800 |
| C | 4.16532200  | 0.41004500  | 0.25847300  |
| N | 5.29094700  | 0.65115000  | 0.43859000  |
| C | -2.05046900 | -0.95929300 | -0.61638900 |
| C | -2.42090100 | -1.15326000 | 0.74450000  |
| C | -3.14045400 | -0.17417300 | 1.42171100  |
| C | -3.56583600 | 0.98365900  | 0.75053100  |
| C | -3.28707500 | 1.14258700  | -0.61755600 |
| C | -2.56886500 | 0.17078600  | -1.30604500 |

|   |             |             |             |
|---|-------------|-------------|-------------|
| H | -2.10791200 | -2.05664600 | 1.25928200  |
| H | -3.38997500 | -0.31384100 | 2.46974600  |
| H | -4.13093800 | 1.74377100  | 1.28165200  |
| H | -3.65191100 | 2.02000500  | -1.14421000 |
| H | -2.36954300 | 0.28591300  | -2.36731400 |
| H | -1.69545200 | -1.80842100 | -1.19182300 |

**TS2(Ben)**

-1 2

|   |             |             |             |
|---|-------------|-------------|-------------|
| C | 1.03643700  | 0.52078800  | -0.06021900 |
| C | 1.55227800  | -0.31553100 | -1.07219000 |
| C | 1.90144800  | 0.89129600  | 0.98599700  |
| C | 2.86797600  | -0.76031600 | -1.04930700 |
| H | 0.90131000  | -0.63409500 | -1.87991400 |
| C | 3.22134000  | 0.44777200  | 1.03181800  |
| H | 1.54153700  | 1.54654900  | 1.77231700  |
| C | 3.71692600  | -0.38281800 | 0.01122300  |
| H | 3.24248700  | -1.40472600 | -1.83809300 |
| H | 3.87075100  | 0.74895400  | 1.84767900  |
| C | 5.07166500  | -0.84081400 | 0.04785600  |
| N | 6.17638200  | -1.21383100 | 0.07643800  |
| C | -0.40944600 | 0.97692300  | -0.12538800 |
| C | -0.95799200 | 1.57902000  | 1.12483600  |

|   |             |             |             |
|---|-------------|-------------|-------------|
| C | -1.82202500 | 2.64781200  | 1.11515000  |
| C | -2.16914200 | 3.31257800  | -0.08980000 |
| C | -1.57302500 | 2.87580600  | -1.30315500 |
| C | -0.70935500 | 1.80858100  | -1.33627300 |
| H | -2.24360300 | 2.99861600  | 2.05528000  |
| H | -1.78953200 | 3.41165400  | -2.22538100 |
| H | -1.00758400 | -0.06272400 | -0.30491800 |
| O | -1.67266700 | -1.42262700 | -0.73344200 |
| C | -2.70433600 | -1.93873500 | 0.05376200  |
| C | -3.17402500 | -3.29435400 | -0.53024500 |
| H | -3.53078800 | -3.15743900 | -1.55841900 |
| H | -2.33718900 | -4.00313200 | -0.55341800 |
| H | -3.98713000 | -3.74289200 | 0.05723500  |
| C | -2.22421400 | -2.17600300 | 1.50982100  |
| H | -1.37430200 | -2.86959800 | 1.51393900  |
| H | -1.89332600 | -1.23171500 | 1.95695200  |
| H | -3.01299200 | -2.59751000 | 2.14788600  |
| C | -3.91704000 | -0.97212500 | 0.08330900  |
| H | -4.28549300 | -0.80648700 | -0.93668800 |
| H | -4.74849200 | -1.35958200 | 0.68811800  |
| H | -3.61507500 | -0.00315800 | 0.49668400  |
| H | -0.72777600 | 1.09055500  | 2.06870300  |
| H | -2.84479000 | 4.16191700  | -0.07926000 |



|   |             |            |             |
|---|-------------|------------|-------------|
| H | -0.25617700 | 1.51336700 | -2.27940700 |
|---|-------------|------------|-------------|

**TS1(Bfu)**

0 2

|   |            |            |            |
|---|------------|------------|------------|
| C | 1.09219100 | 1.58526800 | 0.97542500 |
|---|------------|------------|------------|

|   |            |             |            |
|---|------------|-------------|------------|
| C | 2.45312200 | -0.12375500 | 0.67313600 |
|---|------------|-------------|------------|

|   |            |            |             |
|---|------------|------------|-------------|
| C | 2.52185300 | 0.66079300 | -0.49835100 |
|---|------------|------------|-------------|

|   |            |            |            |
|---|------------|------------|------------|
| H | 0.55697300 | 2.25719900 | 1.62766900 |
|---|------------|------------|------------|

|   |             |            |            |
|---|-------------|------------|------------|
| C | -1.10779900 | 0.74263600 | 0.41313000 |
|---|-------------|------------|------------|

|   |             |             |            |
|---|-------------|-------------|------------|
| C | -1.40546600 | -0.52469500 | 0.88594500 |
|---|-------------|-------------|------------|

|   |             |            |             |
|---|-------------|------------|-------------|
| C | -1.98366900 | 1.52131600 | -0.32558600 |
|---|-------------|------------|-------------|

|   |             |             |            |
|---|-------------|-------------|------------|
| C | -2.66990100 | -1.05252200 | 0.60100600 |
|---|-------------|-------------|------------|

|   |             |             |            |
|---|-------------|-------------|------------|
| H | -0.68977200 | -1.10089800 | 1.46507500 |
|---|-------------|-------------|------------|

|   |             |            |             |
|---|-------------|------------|-------------|
| C | -3.25002700 | 0.99802400 | -0.60894300 |
|---|-------------|------------|-------------|

|   |             |            |             |
|---|-------------|------------|-------------|
| H | -1.71178200 | 2.51064500 | -0.68274000 |
|---|-------------|------------|-------------|

|   |             |             |             |
|---|-------------|-------------|-------------|
| C | -3.58850200 | -0.28843700 | -0.14502200 |
|---|-------------|-------------|-------------|

|   |             |             |            |
|---|-------------|-------------|------------|
| H | -2.94619700 | -2.04197600 | 0.95195500 |
|---|-------------|-------------|------------|

|   |             |            |             |
|---|-------------|------------|-------------|
| H | -3.96935200 | 1.57440200 | -1.18238000 |
|---|-------------|------------|-------------|

|   |             |             |             |
|---|-------------|-------------|-------------|
| C | -4.88474700 | -0.82727700 | -0.43666200 |
|---|-------------|-------------|-------------|

|   |             |             |             |
|---|-------------|-------------|-------------|
| N | -5.93808100 | -1.26518300 | -0.67359000 |
|---|-------------|-------------|-------------|

|   |            |            |            |
|---|------------|------------|------------|
| O | 1.60759600 | 0.45842900 | 1.58562800 |
|---|------------|------------|------------|

|   |            |            |             |
|---|------------|------------|-------------|
| C | 1.65803800 | 1.78312000 | -0.26522200 |
|---|------------|------------|-------------|

|   |            |             |             |
|---|------------|-------------|-------------|
| C | 3.15540300 | -1.30919100 | 0.85248000  |
| C | 3.97123400 | -1.71324500 | -0.20863600 |
| H | 4.54346300 | -2.63129800 | -0.11781500 |
| C | 4.06583700 | -0.95253700 | -1.39342000 |
| H | 4.71033300 | -1.30081600 | -2.19484300 |
| C | 3.34936300 | 0.23174100  | -1.55365300 |
| H | 3.42653500 | 0.81056500  | -2.46887600 |
| H | 3.07525800 | -1.88588200 | 1.76769800  |
| H | 1.44875700 | 2.60948000  | -0.92939500 |

**TS2(Bfu)**

-1 2

|   |             |             |             |
|---|-------------|-------------|-------------|
| C | -0.29719300 | -0.30273600 | 0.35678700  |
| C | -2.19607500 | -1.18199700 | -0.57562200 |
| C | -2.26130700 | -1.49569600 | 0.81641800  |
| H | -0.38033500 | 0.91278200  | 0.56561600  |
| C | 1.15482600  | -0.61379500 | 0.19159000  |
| C | 2.00293100  | -0.59259800 | 1.31893500  |
| C | 1.72941200  | -0.85442400 | -1.07083400 |
| C | 3.36799800  | -0.81380100 | 1.19697800  |
| H | 1.58798600  | -0.39905700 | 2.30317600  |
| C | 3.09648000  | -1.07734000 | -1.20657900 |
| H | 1.09489100  | -0.87301800 | -1.94893600 |

|   |             |             |             |
|---|-------------|-------------|-------------|
| C | 3.93005700  | -1.05943000 | -0.07285700 |
| H | 4.00407500  | -0.79931500 | 2.07596900  |
| H | 3.52196900  | -1.26867300 | -2.18647600 |
| O | -0.52613000 | 2.30251300  | 0.99705400  |
| C | -0.61670100 | 3.31684300  | 0.03473600  |
| C | -0.64048600 | 4.68984100  | 0.74756400  |
| H | -0.71477700 | 5.52429500  | 0.03714500  |
| H | -1.49705100 | 4.74387700  | 1.42998400  |
| H | 0.27333000  | 4.82352600  | 1.33879700  |
| C | -1.91491100 | 3.16788000  | -0.79737400 |
| H | -1.92689100 | 2.19645000  | -1.30413900 |
| H | -2.78922300 | 3.21674500  | -0.13703500 |
| H | -2.01624500 | 3.95444400  | -1.55730700 |
| C | 0.59957500  | 3.28005900  | -0.92475600 |
| H | 1.53014900  | 3.39435600  | -0.35566600 |
| H | 0.64107600  | 2.31918500  | -1.45045700 |
| H | 0.55850500  | 4.07857100  | -1.67745900 |
| C | 5.33462800  | -1.28961400 | -0.20672500 |
| N | 6.48066100  | -1.47831600 | -0.31569300 |
| O | -1.03601800 | -0.54276400 | -0.88754000 |
| C | -1.07603800 | -1.01826800 | 1.39703200  |
| C | -3.20079400 | -1.50591200 | -1.47148600 |
| C | -4.33056000 | -2.18256100 | -0.96449800 |

|   |             |             |             |
|---|-------------|-------------|-------------|
| H | -5.13686800 | -2.45225300 | -1.63996400 |
| C | -4.42468500 | -2.50959300 | 0.40033200  |
| H | -5.30764500 | -3.02935900 | 0.76230000  |
| C | -3.40827700 | -2.17652200 | 1.29875100  |
| H | -3.49211600 | -2.43223700 | 2.35112000  |
| H | -3.11756500 | -1.25097000 | -2.52339100 |
| H | -0.79399500 | -1.07114900 | 2.44011100  |

**TS1(Xyl)**

0 2

|   |             |             |             |
|---|-------------|-------------|-------------|
| C | -0.55467600 | 0.37504500  | 0.46865300  |
| C | -0.89033900 | 0.05932900  | -0.83953700 |
| C | -1.47999500 | 0.41845800  | 1.50148400  |
| C | -2.22716100 | -0.21943800 | -1.13805600 |
| H | -0.13943800 | 0.03262000  | -1.62447700 |
| C | -2.81996300 | 0.14140900  | 1.21022900  |
| H | -1.18898900 | 0.66307200  | 2.51982300  |
| C | -3.19063900 | -0.17742500 | -0.11050900 |
| H | -2.52722700 | -0.46625700 | -2.15180300 |
| H | -3.57231800 | 0.17125900  | 1.99240100  |
| C | -4.56247000 | -0.46269900 | -0.41289100 |
| N | -5.67764300 | -0.69457800 | -0.65870700 |
| C | 1.63425100  | 0.65060800  | 0.98902900  |

|   |            |             |             |
|---|------------|-------------|-------------|
| C | 2.05460100 | -0.70205600 | 1.09797900  |
| C | 2.78203500 | -1.32123300 | 0.08293900  |
| C | 3.15125300 | -0.54243100 | -1.03153600 |
| C | 2.81924000 | 0.81795600  | -1.10826300 |
| C | 2.09279900 | 1.44945200  | -0.09808100 |
| H | 3.15525900 | 1.39826600  | -1.96437900 |
| H | 1.26267600 | 1.15022300  | 1.87943900  |
| C | 1.75652200 | 2.91753700  | -0.15597100 |
| H | 2.06323000 | 3.43283400  | 0.76180000  |
| H | 2.24894500 | 3.40605700  | -1.00129400 |
| H | 0.67467300 | 3.06921600  | -0.26069100 |
| H | 3.72600900 | -0.99633400 | -1.83521100 |
| H | 1.77077900 | -1.26904500 | 1.98087000  |
| C | 3.17484200 | -2.77849700 | 0.16998600  |
| H | 2.60551000 | -3.38352200 | -0.54624200 |
| H | 4.23617600 | -2.92045600 | -0.06090600 |
| H | 2.98640600 | -3.18197600 | 1.16889400  |

**TS2(Xyl)**

-1 2

|   |             |             |             |
|---|-------------|-------------|-------------|
| C | -1.23075600 | -0.23501300 | 0.06024400  |
| C | -1.66149600 | 0.85030200  | -0.72891300 |
| C | -2.21815300 | -1.00273900 | 0.71098200  |

|   |             |             |             |
|---|-------------|-------------|-------------|
| C | -3.01095900 | 1.16081800  | -0.86599500 |
| H | -0.91253600 | 1.46615000  | -1.21638600 |
| C | -3.57196200 | -0.70262900 | 0.59527500  |
| H | -1.91739100 | -1.85937000 | 1.30690600  |
| C | -3.98056500 | 0.38578900  | -0.19909800 |
| H | -3.32081000 | 2.00293500  | -1.47682600 |
| H | -4.31451200 | -1.30970700 | 1.10381100  |
| C | -5.36967700 | 0.70104400  | -0.32830500 |
| N | -6.50268600 | 0.95741400  | -0.43565100 |
| C | 0.24267100  | -0.59014500 | 0.14459900  |
| C | 0.72378500  | -1.15355400 | 1.44137700  |
| C | 1.65289300  | -2.17529800 | 1.44559700  |
| C | 2.11588900  | -2.80432600 | 0.26356100  |
| C | 1.59152200  | -2.40024400 | -0.99883600 |
| C | 0.67081200  | -1.37953300 | -1.04576800 |
| H | 2.05146200  | -2.51066600 | 2.40318100  |
| H | 0.83002700  | 0.56329000  | 0.00633700  |
| C | 0.31911500  | -0.48287200 | 2.73111900  |
| H | 0.54985500  | 0.59108200  | 2.70329300  |
| H | -0.75625200 | -0.55940300 | 2.93498900  |
| H | 0.84960000  | -0.91963400 | 3.58378400  |
| O | 1.27681800  | 1.85929000  | -0.24090500 |
| C | 2.65431500  | 2.11722400  | -0.11971500 |

|   |            |             |             |
|---|------------|-------------|-------------|
| C | 3.15123700 | 1.82343100  | 1.31662600  |
| H | 2.60107000 | 2.43958800  | 2.03793800  |
| H | 2.98080400 | 0.77165000  | 1.56999100  |
| H | 4.22231200 | 2.03613200  | 1.43244100  |
| C | 3.46822500 | 1.25733000  | -1.11710000 |
| H | 3.30047200 | 0.19224800  | -0.92532100 |
| H | 3.14723300 | 1.46938800  | -2.14441500 |
| H | 4.54600300 | 1.45617200  | -1.04801100 |
| C | 2.90379600 | 3.61024700  | -0.43283100 |
| H | 2.33984300 | 4.24051300  | 0.26505200  |
| H | 3.96665100 | 3.87573500  | -0.35315600 |
| H | 2.56792500 | 3.84536600  | -1.44990500 |
| H | 2.83736600 | -3.61515700 | 0.32244100  |
| H | 0.25863200 | -1.08206900 | -2.00911800 |
| C | 2.04425200 | -3.10886000 | -2.25789000 |
| H | 1.85700300 | -4.18847400 | -2.19845900 |
| H | 1.52697800 | -2.72435800 | -3.14242800 |
| H | 3.12286200 | -2.98344400 | -2.41892500 |

**TS1(OMe)**

0 2

|   |            |             |            |
|---|------------|-------------|------------|
| C | 2.31197600 | 0.42498000  | 0.89461400 |
| C | 2.75571300 | -0.83930900 | 1.32978100 |

|   |             |             |             |
|---|-------------|-------------|-------------|
| C | 3.48660800  | -1.41899800 | 0.26958300  |
| C | 3.53234800  | -0.48367400 | -0.76020900 |
| N | 2.86913000  | 0.64750600  | -0.35489300 |
| H | 1.97912300  | 1.26358100  | 1.48931200  |
| H | 2.53202100  | -1.28063400 | 2.29134700  |
| H | 3.93992700  | -2.40086400 | 0.24796800  |
| H | 3.98403700  | -0.53791600 | -1.74059100 |
| C | 0.05492700  | 0.09342800  | 0.42346800  |
| C | -0.89071900 | 0.91588400  | 1.01085800  |
| C | -0.30894600 | -0.91890400 | -0.45795700 |
| C | -2.25552100 | 0.73693200  | 0.70968500  |
| H | -0.60577900 | 1.70661700  | 1.70292600  |
| C | -1.66036200 | -1.10232100 | -0.76803200 |
| H | 0.43833300  | -1.56897000 | -0.90758900 |
| C | -2.63472100 | -0.27439700 | -0.18314600 |
| H | -2.99283800 | 1.38419500  | 1.17120600  |
| H | -1.97807600 | -1.88152400 | -1.45584200 |
| C | 2.61089000  | 1.81949800  | -1.17741000 |
| H | 2.69190700  | 2.72408800  | -0.56988900 |
| H | 3.35109400  | 1.86680200  | -1.97766100 |
| H | 1.60773000  | 1.77461900  | -1.61508800 |
| O | -3.93231200 | -0.53631700 | -0.54874700 |
| C | -4.97186200 | 0.26759500  | 0.01071200  |



|   |             |             |             |
|---|-------------|-------------|-------------|
| H | -4.85005400 | 1.32193500  | -0.26335300 |
| H | -5.90196900 | -0.11236900 | -0.41262800 |
| H | -5.00285400 | 0.17414900  | 1.10243100  |

**TS1(Ph)**

0 2

|   |             |             |             |
|---|-------------|-------------|-------------|
| C | 1.39805600  | 0.35011900  | 0.94318500  |
| C | 1.82765700  | -0.94251900 | 1.30503400  |
| C | 2.61131900  | -1.44099000 | 0.24148900  |
| C | 2.70227300  | -0.43181200 | -0.71299500 |
| N | 2.01496500  | 0.66548900  | -0.25780700 |
| H | 1.03889000  | 1.14314800  | 1.58357300  |
| H | 1.56055700  | -1.45419700 | 2.21950200  |
| H | 3.07016900  | -2.41787200 | 0.16943400  |
| H | 3.20111900  | -0.41262000 | -1.67160500 |
| C | -0.82515800 | 0.05626300  | 0.34388100  |
| C | -1.79226000 | 0.84171500  | 0.95584600  |
| C | -1.13789600 | -0.89262700 | -0.61977800 |
| C | -3.13633700 | 0.67274100  | 0.57930300  |
| H | -1.52997000 | 1.58031600  | 1.71162600  |
| C | -2.48163000 | -1.05401600 | -0.99623400 |
| H | -0.36381400 | -1.50465200 | -1.07777800 |
| C | -3.47705600 | -0.27233000 | -0.39547000 |

|   |             |             |             |
|---|-------------|-------------|-------------|
| H | -3.91046800 | 1.27799700  | 1.04558900  |
| H | -2.74927900 | -1.78885000 | -1.75211400 |
| C | 1.79066400  | 1.89435800  | -1.00365400 |
| H | 1.83204500  | 2.75141600  | -0.32716000 |
| H | 2.57163800  | 2.00440600  | -1.75763400 |
| H | 0.81259600  | 1.87826400  | -1.49676100 |
| H | -4.51603200 | -0.40119100 | -0.68566200 |

### **TS1(diMe)**

0 2

|   |             |             |             |
|---|-------------|-------------|-------------|
| C | 1.94756200  | -1.03180800 | -0.40701800 |
| C | 2.38393300  | -0.41686000 | -1.59844400 |
| C | 3.19216200  | 0.68308200  | -1.23563000 |
| C | 3.29166600  | 0.68271900  | 0.15254800  |
| N | 2.58588300  | -0.38829300 | 0.64245300  |
| H | 1.57400300  | -2.03664100 | -0.26883700 |
| H | 2.10421900  | -0.72486500 | -2.59661900 |
| H | 3.66106500  | 1.39698600  | -1.89939900 |
| H | 3.80790800  | 1.35658700  | 0.82148000  |
| C | -0.25451200 | -0.36328900 | -0.18864800 |
| C | -1.24121200 | -1.33258500 | -0.20462800 |
| C | -0.53139200 | 0.99131600  | -0.06279500 |
| C | -2.59261200 | -0.93803900 | -0.08405600 |

|   |             |             |             |
|---|-------------|-------------|-------------|
| H | -0.99760600 | -2.39015000 | -0.30511100 |
| C | -1.86848600 | 1.40665400  | 0.06863900  |
| H | 0.26789900  | 1.73035200  | -0.06406000 |
| C | -2.87839100 | 0.42656500  | 0.05233300  |
| C | 2.36492400  | -0.68639200 | 2.04900500  |
| H | 2.39304500  | -1.76713100 | 2.20811900  |
| H | 3.15480500  | -0.22379200 | 2.64289800  |
| H | 1.39309100  | -0.30430200 | 2.38024600  |
| H | -3.91644900 | 0.73990700  | 0.14775800  |
| C | -2.22067200 | 2.86874700  | 0.23554800  |
| H | -1.35102500 | 3.50892900  | 0.06151200  |
| H | -3.01080700 | 3.17123100  | -0.46071100 |
| H | -2.58851200 | 3.07434500  | 1.24838100  |
| C | -3.69875700 | -1.97006000 | -0.11541800 |
| H | -4.66671000 | -1.52501000 | 0.13262000  |
| H | -3.78557100 | -2.42681500 | -1.10886300 |
| H | -3.50581200 | -2.78187900 | 0.59478800  |

**TS1(Ph)**

0 2

|   |             |             |             |
|---|-------------|-------------|-------------|
| C | -3.63348800 | 0.87856500  | 0.07740800  |
| C | -4.00093000 | 0.86230000  | -1.28305500 |
| C | -4.58115800 | -0.39710700 | -1.54917100 |

|   |             |             |             |
|---|-------------|-------------|-------------|
| C | -4.61844700 | -1.09700300 | -0.34645100 |
| N | -4.09563400 | -0.30029300 | 0.64109500  |
| H | -3.43203600 | 1.73125400  | 0.71001000  |
| H | -3.82477900 | 1.66569800  | -1.98512400 |
| H | -4.94233600 | -0.76266300 | -2.50094900 |
| H | -4.97587200 | -2.09194600 | -0.12187900 |
| C | -1.32808500 | 0.57554500  | 0.03406300  |
| C | -0.50660200 | 1.52793400  | 0.62015300  |
| C | -0.81145900 | -0.55761900 | -0.57786600 |
| C | 0.88280500  | 1.33287900  | 0.59953400  |
| H | -0.91616200 | 2.41272100  | 1.10455600  |
| C | 0.57731300  | -0.74886800 | -0.59288400 |
| H | -1.46347300 | -1.28882300 | -1.05078300 |
| C | 1.44489400  | 0.19292300  | -0.00537300 |
| H | 1.53068000  | 2.06323700  | 1.07785700  |
| H | 0.98995600  | -1.62542100 | -1.08614400 |
| C | -3.87163400 | -0.69846400 | 2.02252900  |
| H | -4.09039200 | 0.13854100  | 2.68995700  |
| H | -4.53652400 | -1.52759600 | 2.26924400  |
| H | -2.83282700 | -1.01132100 | 2.17386700  |
| C | 2.91914900  | -0.01179300 | -0.02515400 |
| C | 3.79846500  | 1.06913200  | -0.22498800 |
| C | 3.47554700  | -1.29196100 | 0.15680900  |

|   |            |             |             |
|---|------------|-------------|-------------|
| C | 5.18228800 | 0.87817300  | -0.23995900 |
| H | 3.39582000 | 2.06421800  | -0.38990700 |
| C | 4.85909400 | -1.48473400 | 0.13865800  |
| H | 2.82148500 | -2.14060900 | 0.33427700  |
| C | 5.72001000 | -0.40023200 | -0.05874600 |
| H | 5.83953500 | 1.72778400  | -0.40250100 |
| H | 5.26410400 | -2.48163400 | 0.28831000  |
| H | 6.79568400 | -0.54941200 | -0.07149100 |

**TS1(Me)**

0 2

|   |             |             |             |
|---|-------------|-------------|-------------|
| C | 1.90999800  | 0.39821600  | 0.88411700  |
| C | 2.30881000  | -0.87890400 | 1.32696300  |
| C | 3.01459400  | -1.49230000 | 0.26871900  |
| C | 3.09280700  | -0.56607400 | -0.76725300 |
| N | 2.47334300  | 0.59191000  | -0.36777900 |
| H | 1.61514900  | 1.25334100  | 1.47559800  |
| H | 2.07121400  | -1.30552900 | 2.29184100  |
| H | 3.43094000  | -2.49052400 | 0.25250900  |
| H | 3.53999400  | -0.64336800 | -1.74814600 |
| C | -0.35174300 | 0.15314000  | 0.42292600  |
| C | -1.26343200 | 0.98504500  | 1.05375200  |
| C | -0.75408000 | -0.82345400 | -0.47838200 |

|   |             |             |             |
|---|-------------|-------------|-------------|
| C | -2.63178500 | 0.83576300  | 0.76368600  |
| H | -0.94359800 | 1.74978800  | 1.75995200  |
| C | -2.12067900 | -0.96025800 | -0.76366800 |
| H | -0.02978700 | -1.47614100 | -0.96131500 |
| C | -3.07761300 | -0.13540200 | -0.14522600 |
| H | -3.35655600 | 1.48575400  | 1.25072600  |
| H | -2.44732700 | -1.71840600 | -1.47369200 |
| C | 2.25694100  | 1.76744400  | -1.19708800 |
| H | 2.37473100  | 2.67233400  | -0.59598900 |
| H | 2.99526400  | 1.78119100  | -2.00035500 |
| H | 1.25114700  | 1.75819500  | -1.63106100 |
| C | -4.55066400 | -0.30670100 | -0.44654200 |
| H | -5.14113700 | 0.50926100  | -0.01992800 |
| H | -4.73759700 | -0.33160200 | -1.52580200 |
| H | -4.93476900 | -1.24675200 | -0.03190200 |

**[PLY(O,O)-K]<sup>2-</sup> (III; Cat<sup>2-</sup>)**

-2 1

|   |             |             |             |
|---|-------------|-------------|-------------|
| C | -3.46793200 | 1.21436800  | 0.00015100  |
| C | -4.14547400 | -0.00000100 | 0.00021700  |
| C | -1.26622100 | 0.00000000  | -0.00005500 |
| C | -2.01989800 | 1.24265200  | 0.00001500  |
| H | -5.23747200 | -0.00000100 | 0.00032600  |

|   |             |             |             |
|---|-------------|-------------|-------------|
| C | 0.10619600  | -2.44615500 | -0.00005800 |
| C | -1.30091800 | 2.43816200  | -0.00000900 |
| C | 0.10619500  | 2.44615500  | -0.00009300 |
| H | 0.63705400  | -3.39937300 | -0.00004100 |
| H | 0.63705300  | 3.39937300  | -0.00007300 |
| C | 0.89709700  | -1.28831500 | -0.00019500 |
| C | 0.18265200  | 0.00000000  | -0.00017200 |
| C | 0.89709700  | 1.28831600  | -0.00017400 |
| C | -2.01989700 | -1.24265300 | 0.00004600  |
| C | -1.30091700 | -2.43816300 | 0.00005300  |
| C | -3.46793200 | -1.21436900 | 0.00018300  |
| H | -1.84566900 | -3.38373300 | 0.00015400  |
| H | -4.00610000 | -2.16095200 | 0.00026000  |
| H | -4.00610100 | 2.16095100  | 0.00021000  |
| H | -1.84567000 | 3.38373300  | 0.00006000  |
| O | 2.21013600  | 1.40049100  | -0.00011300 |
| O | 2.21013600  | -1.40048900 | -0.00021100 |
| K | 4.26865500  | -0.00000100 | 0.00011800  |

## 26. References:

1. R. C. Haddon, R. Rayford, & A. M. Hirani, *J. Org. Chem.* 1981, **46**, 4587-4588.
2. S. De, S. Mishra, B. N. Kakde, D. Dey, & A. Bisai, *J. Org. Chem.* 2013, **78**, 7823-7844.
3. M. J. Frisch, *et al.* Gaussian 16, Revision B.01, Fox, Gaussian, Inc., Wallingford CT, 2016.
4. A. D. Becke, *J. Chem. Phys.* 1993, **98**, 5648–5652.
5. Y. Zhao, & D. G. Truhlar, *Theor. Chem. Acc.*, 2008, **120**, 215–241.
6. D. Geuenich, K. Hess, F. Koehler, & R. Herges, *Chem. Rev.* 2005, **105**, 3758-3772.
7. R. Herges, & D. Geuenich, *J. Phys. Chem.* 2001, **A 105**, 3214-3220.
8. H. Wei, Y. Liu, T. Y. Gopalakrishna, H. Phan, X. Huang, L. Bao, J. Guo, , J. Zhou, S. Luo, J. Wu, & Z. Zeng, *J. Am. Chem. Soc.* 2017, **139**, 15760-15767.
9. Z. Chen, C. S. Wannere, , C. Corminboeuf, R. Puchta, & P. R. Schleyer, *Chem. Rev.* 2005, **105**, 3842-3888.
10. O. V. Dolomanov, L. J. Bourhis, R. J. Gildea, J. A. K. Howard, & H. Puschmann, *J. Appl. Cryst.* 2009, **42**, 339–341.
11. G. M. Sheldrick, *Acta Cryst.* 2015, **A71**, 3–8.
12. D. T. Gryko, O. Vakuliuk, D. Gryko, & B. Koszarna, *J. Org. Chem.* 2009, **74**, 9517-9520.
13. S. Crespi, S. Protti, & M. Fagnoni, *J. Org. Chem.* 2016, **81**, 9612-9619.
14. S. Paul, K. K. Das, S. Manna, & S. Panda, *Chem. Eur. J.* 2020, **26**, 1922–1927.
15. M. Wang, X. Yuan, H. Li, L. Ren, Z. Sun, Y. Hou, & W. Chu, *Catal. Commun.*, 2015, **58**, 154-157.



16. N. G. W. Cowper, C. P. Chernowsky, O. P. Williams, & Z. K. Wickens, *J. Am. Chem. Soc.*, 2020, **142**, 2093-2098.
17. J. R. Naber, B. P. Fors, X. Wu, J. T. Gunn, & S. L. Buchwald *HETEROCYCLES*, 2010, **80**, 1215 – 1226.
18. F. Yu, R. Mao, M. Yu, X. Gu, & Y. Wang, *J. Org. Chem.* 2019, **84**, 9946–9956.
19. S. Zhang, Z. Tang, W. Bao, J. Li, B. Guo, S. Huang, Y. Zhang & Y. Rao, *Org. Biomol. Chem.*, 2019, **17**, 4364–4369.
20. V. Hornillos, M. Giannerini, C. Vila, M. Fañanás-Mastral, & B. L. Fering, *Org. Lett.* 2013, **15**, 5114-5120.
21. X. Li, F. Feng, C. Ren, Y. Teng, Q. Hu, & Z. Yuan, *Synlett*, 2019, **30**, 2131-2135.
22. J. Cao, Z-L. Chen, S-M. Li, G-F. Zhu, Y-Y. Yang, C. Wang, W-Z. Chen, J-T. Wang, J-Q. Zhang, & L. Tang, *Eur. J. Org. Chem.*, 2018, **22**, 2774-2779.
23. T. Wang, S. Shi, M. H. Vilhelmsen, T. Zhang, M. Rudolph, F. Rominger, A. S. K. Hashmi, *Chem. Eur. J.* 2013, **19**, 12512-12516.
24. S. Tani, T. N. Uehara, J. Yamaguchia, & K. Itami, *Chem. Sci.*, 2014, **5**, 123–135.
25. Prez-Perarnau, *et. al.*, *Angew. Chem. Int. Ed.* 2014, **53**, 10150 –10154.
